# Supplementary material for: Chemoselective and stereoselective lithium carbenoid mediated cyclopropanation of acyclic allylic alcohols
Source: Royal Society of Chemistry journal article supplement (doi:10.1039/c5ob02617b), 2016-01-01

## Electronic Supporting Information

# Chemoselective and stereoselective lithium carbenoid mediated cyclopropanation of acyclic allylic alcohols

M. J. Durán-Peña,<sup>a,†</sup> M. E. Flores-Giubi,<sup>a,†</sup> J. M. Botubol-Ares,<sup>a</sup> L. M. Harwood,<sup>b</sup> I. G.  
Collado,<sup>a</sup> A. J. Macías-Sánchez<sup>a</sup> and R. Hernández-Galán<sup>a</sup>

<sup>a</sup>*Departamento de Química Orgánica, Facultad de Ciencias, Campus Universitario Río  
San Pedro s/n, Torre sur, 4º planta, Universidad de Cádiz, 11510, Puerto Real, Cádiz,  
Spain. E-mail: [rosario.hernandez@uca.es](mailto:rosario.hernandez@uca.es), [antoniojose.macias@uca.es](mailto:antoniojose.macias@uca.es)*

<sup>b</sup>*Department of Chemistry, University of Reading, Whiteknights, Reading, RG6 6AD,  
United Kingdom*

## Table of contents:

|                                                                                                        |           |
|--------------------------------------------------------------------------------------------------------|-----------|
| <b>Part A:</b> Optimization data (Table S1).....                                                       | <b>S2</b> |
| <b>Part B:</b> Discussion of spectroscopic observations for compounds <b>10</b> and<br><b>11</b> ..... | <b>S3</b> |

**Part C:**  $^1\text{H}$  and  $^{13}\text{C}$ -NMR spectra for compounds **3b**, **6-13**, **14a-c**, **15b-c**,  
**16b-c**, **18a-c** and **19a-c** ;  $^1\text{H}$ -NMR spectra for compounds **4** and **5**;  
 2D NMR experiments for compounds **9** and **10** .....**S4-53**

**Part D:** NOESY 1D spectra for compounds **7**, **9**, **12**, **14b**, **18b** and **19b**;  
 NOESY 2D spectra for compounds **6**, **8** and **11**.....**S54-62**

### **PART A: TABLE S1**

**Table S1. Optimization of cyclopropanation of compound 1 with 2,2-dibromopropane**

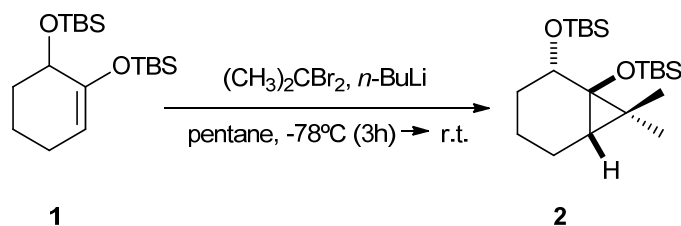

| Concentration (n° equiv.) |                    |                |           |
|---------------------------|--------------------|----------------|-----------|
| Entry                     | 2,2-dibromopropane | <i>n</i> -BuLi | Yield (%) |
| <b>1</b>                  | 1                  | 2              | 12        |
| <b>2</b>                  | 2                  | 4              | 21        |
| <b>3</b>                  | 4                  | 6              | 40        |
| <b>4</b>                  | 4                  | 8              | 50        |

## **PART B : Discussion of spectroscopic observations for compounds 10 and 11**

Dichlorocyclopropanation compound **10** showed ions in its HRMS (APGC<sup>+</sup>) at  $m/z$ = 237.0809, 219.0710, 201.1050 and 183.0941, consistent with formulae C<sub>11</sub>H<sub>19</sub>OCl<sub>2</sub>, C<sub>11</sub>H<sub>17</sub>Cl<sub>2</sub>, C<sub>11</sub>H<sub>8</sub>OCl and C<sub>11</sub>H<sub>16</sub>Cl respectively, that correspond to the protonated molecular ion, the loss of one molecule of water, the loss of a molecule of HCl and the loss of a molecule of water and another of HCl from a protonated ion of molecular formula C<sub>11</sub>H<sub>19</sub>OCl<sub>2</sub>. The presence of two chlorine atoms in the compound **10** was confirmed by a quaternary carbon resonance at  $\delta_C$  72.0 (C-2') ppm in its <sup>13</sup>C NMR spectrum. On the other hand, spectroscopic data for compound **10** showed a homonuclear gCOSY correlation between signals at  $\delta_H$  5.45 (H-2) and 4.16 (CH<sub>2</sub>-1) ppm and gHMBC correlations between signal at  $\delta_C$  72.0 (C-2') ppm and *gem*-dimethyl group signals at  $\delta_H$  1.33 and 1.15 ppm. These data are consistent with a dichlorocyclopropanation on the distal double bond of geraniol, leading to (*E*)-5-(2,2-dichloro-3,3-dimethylcyclopropyl)-3-methylpent-2-en-1-ol (**10**).

Double cyclopropanation compound **11** showed ions in its HRMS (APGC<sup>+</sup>) at  $m/z$ = 265.0302 [M+H-H<sub>2</sub>O-HCl]<sup>+</sup>, 247.0611 [M+H-2HCl]<sup>+</sup> and 229.0539 [M+H-H<sub>2</sub>O-2HCl]<sup>+</sup>, consistent with formulae C<sub>12</sub>H<sub>16</sub>Cl<sub>3</sub>, C<sub>12</sub>H<sub>17</sub>OCl<sub>2</sub> and C<sub>12</sub>H<sub>15</sub>Cl<sub>2</sub> respectively, that correspond to the loss of one molecule of water and another of HCl, the loss of two molecules of HCl and the loss of one molecule of water and two of HCl from a protonated ion of molecular formula C<sub>12</sub>H<sub>19</sub>Cl<sub>4</sub>O. Furthermore, compound **11** presented signals in its <sup>13</sup>C-NMR spectrum at  $\delta_C$  70.1 and 71.7 ppm, corresponding to quaternary carbons substituted with chlorine atoms, consistent with a double cyclopropanation. NOESY 2D effects (Fig. S.1) between signals, at  $\delta_H$  3.78 (CH<sub>2</sub>-1) and 1.23 ((CH<sub>3</sub>)C-3') ppm and  $\delta_H$  1.54 (H-1') ppm, were consistent with stereochemistry for this compound as (1'*R*\*,3'*S*\*,1''*S*\*).

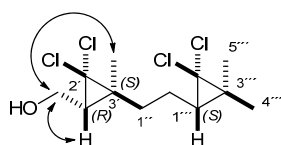

**Fig. S1** Selected NOESY 2D correlations for compound **11**.

# **PART C : $^1\text{H}$ , $^{13}\text{C}$ -NMR and selected 2D NMR spectra**

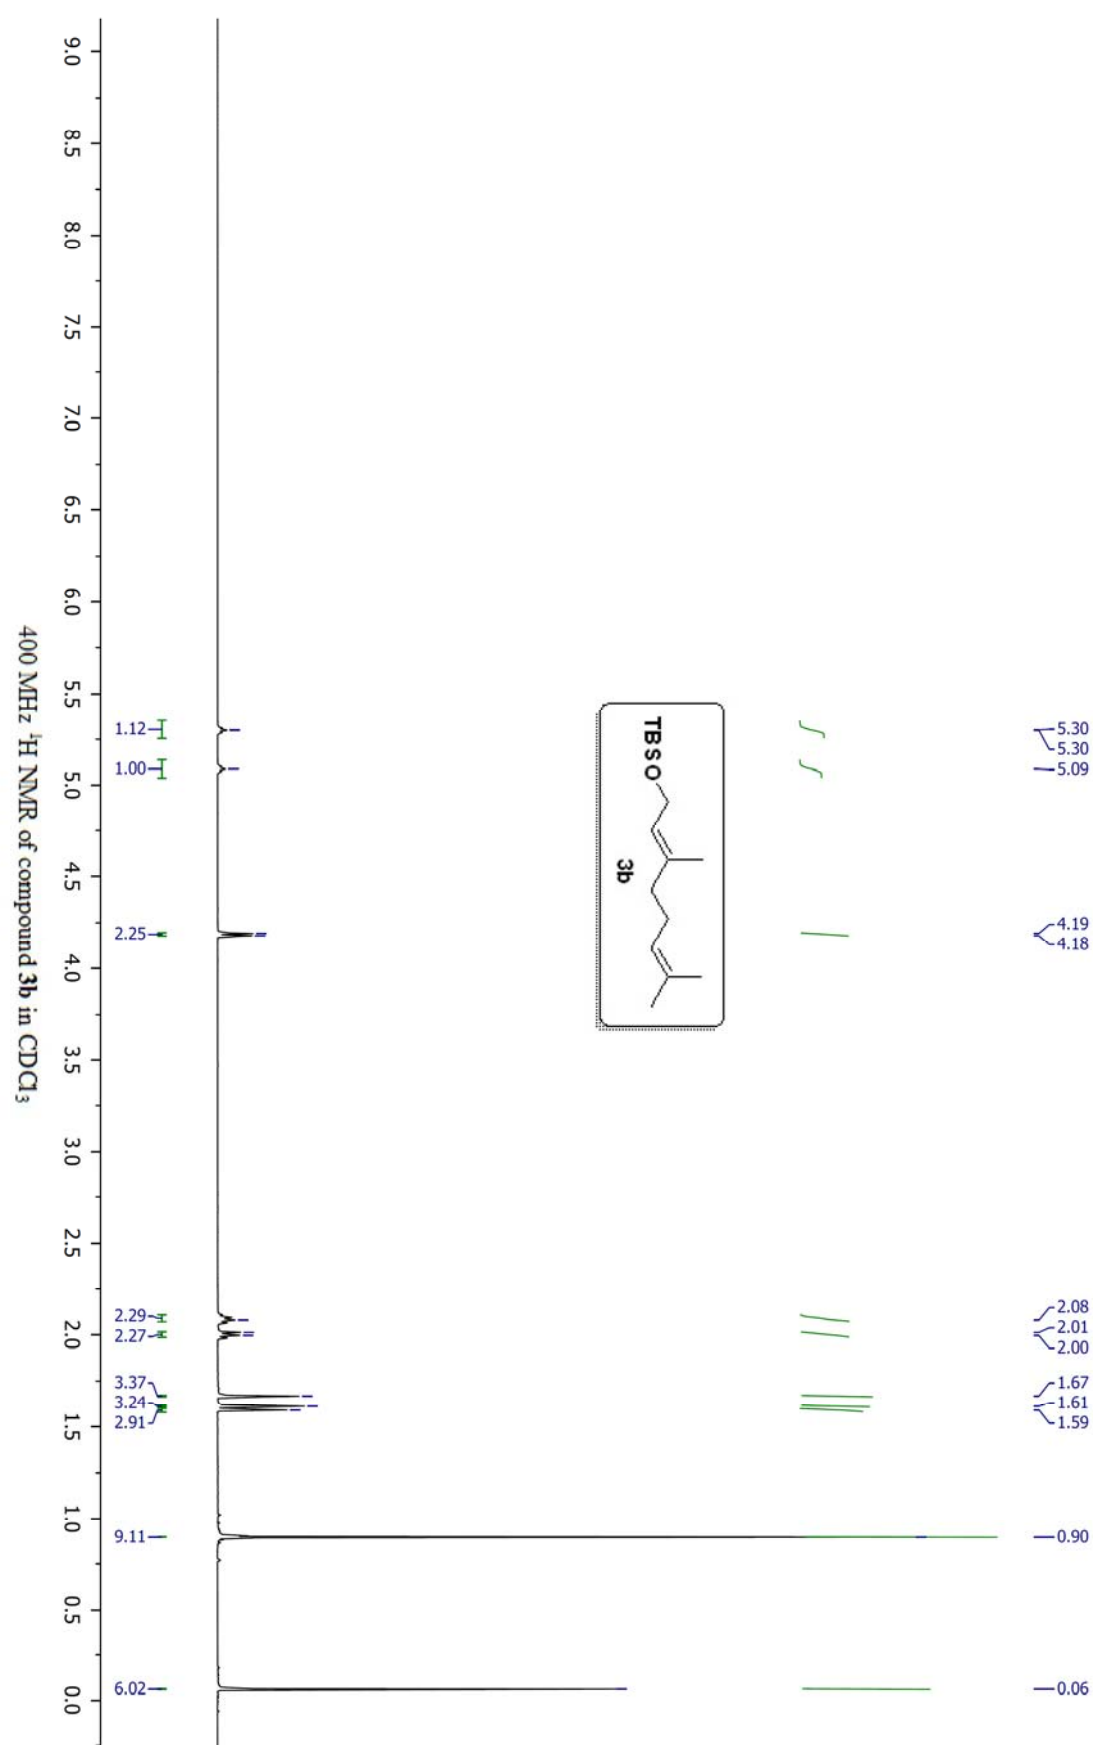

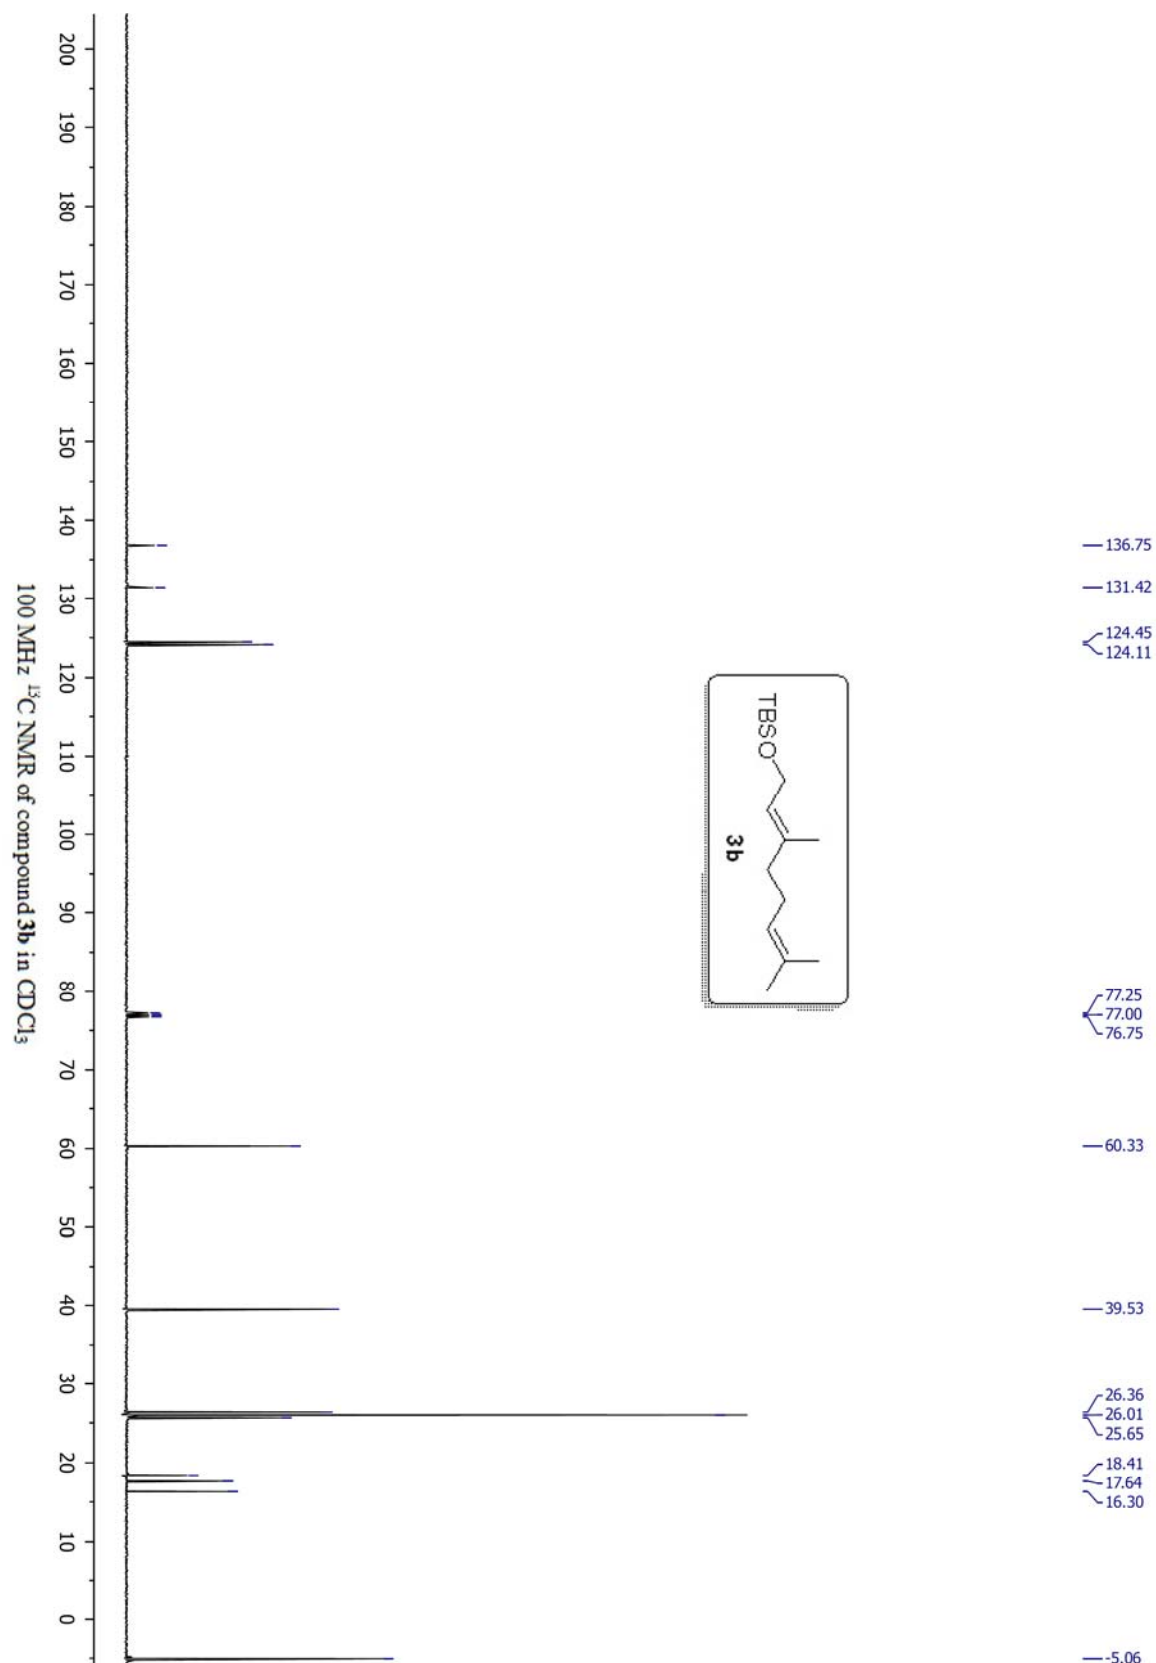

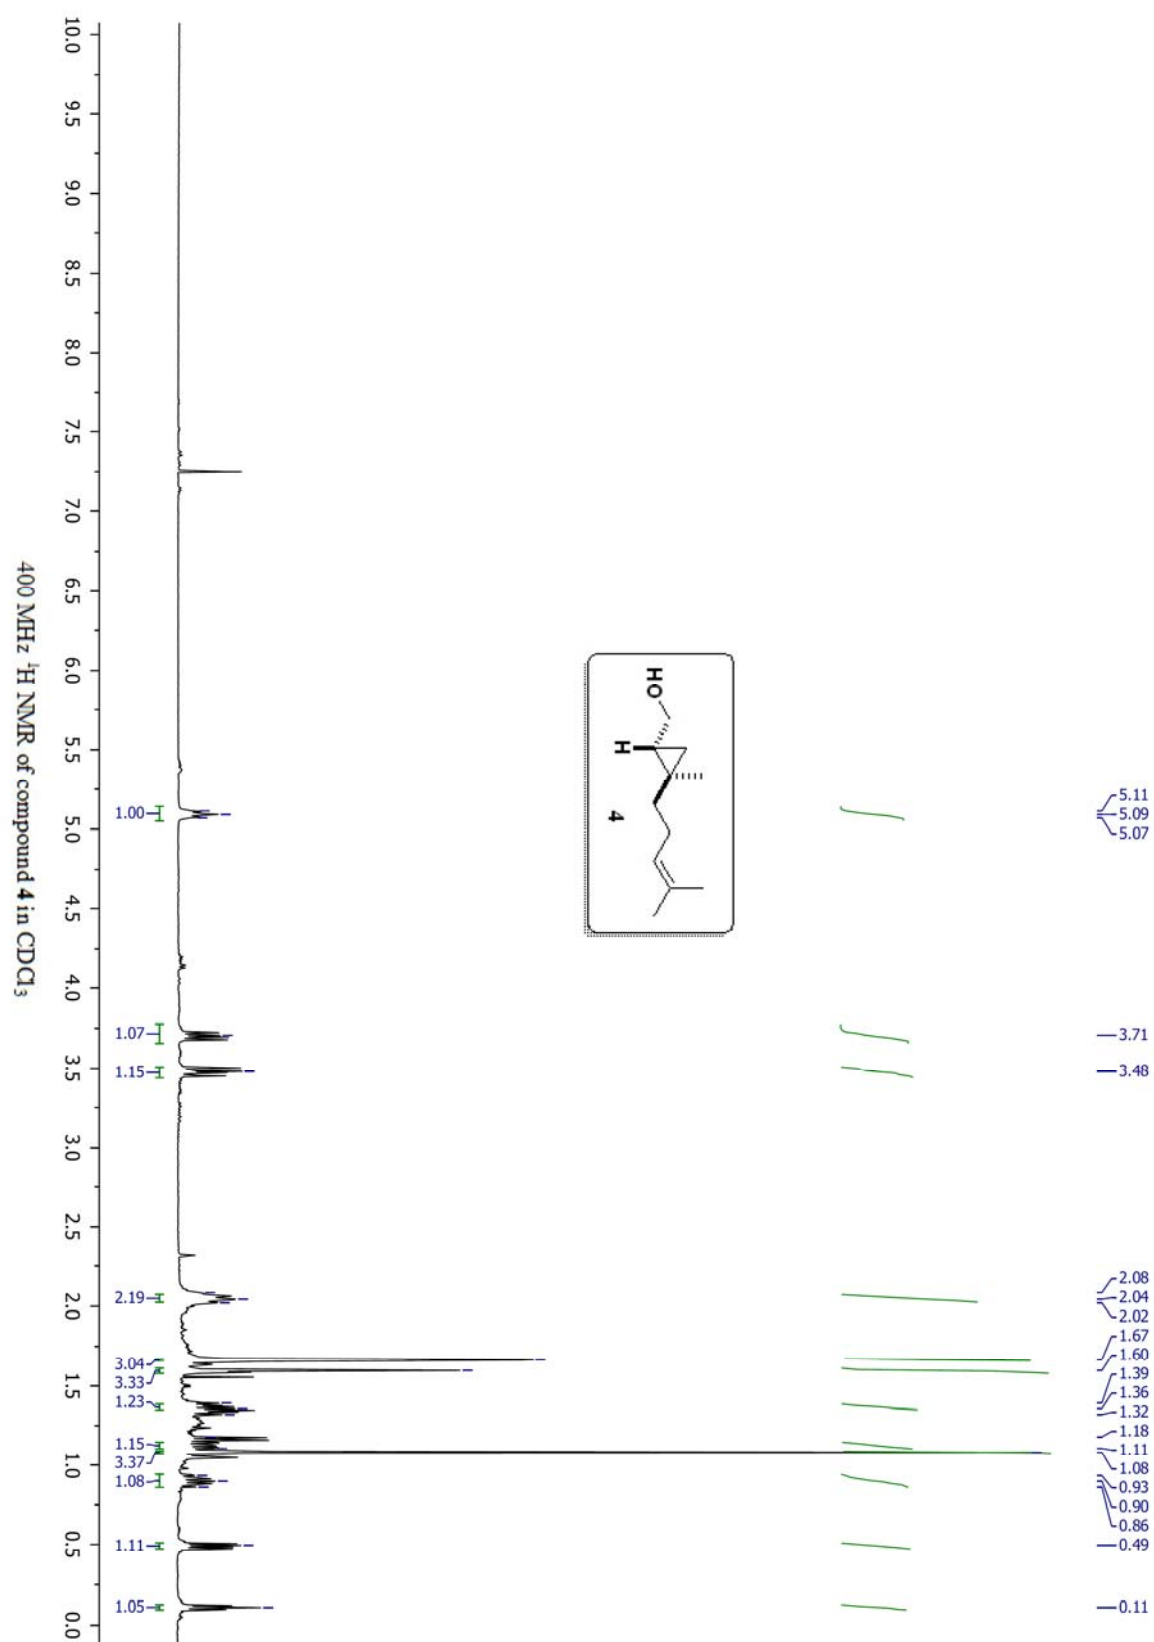

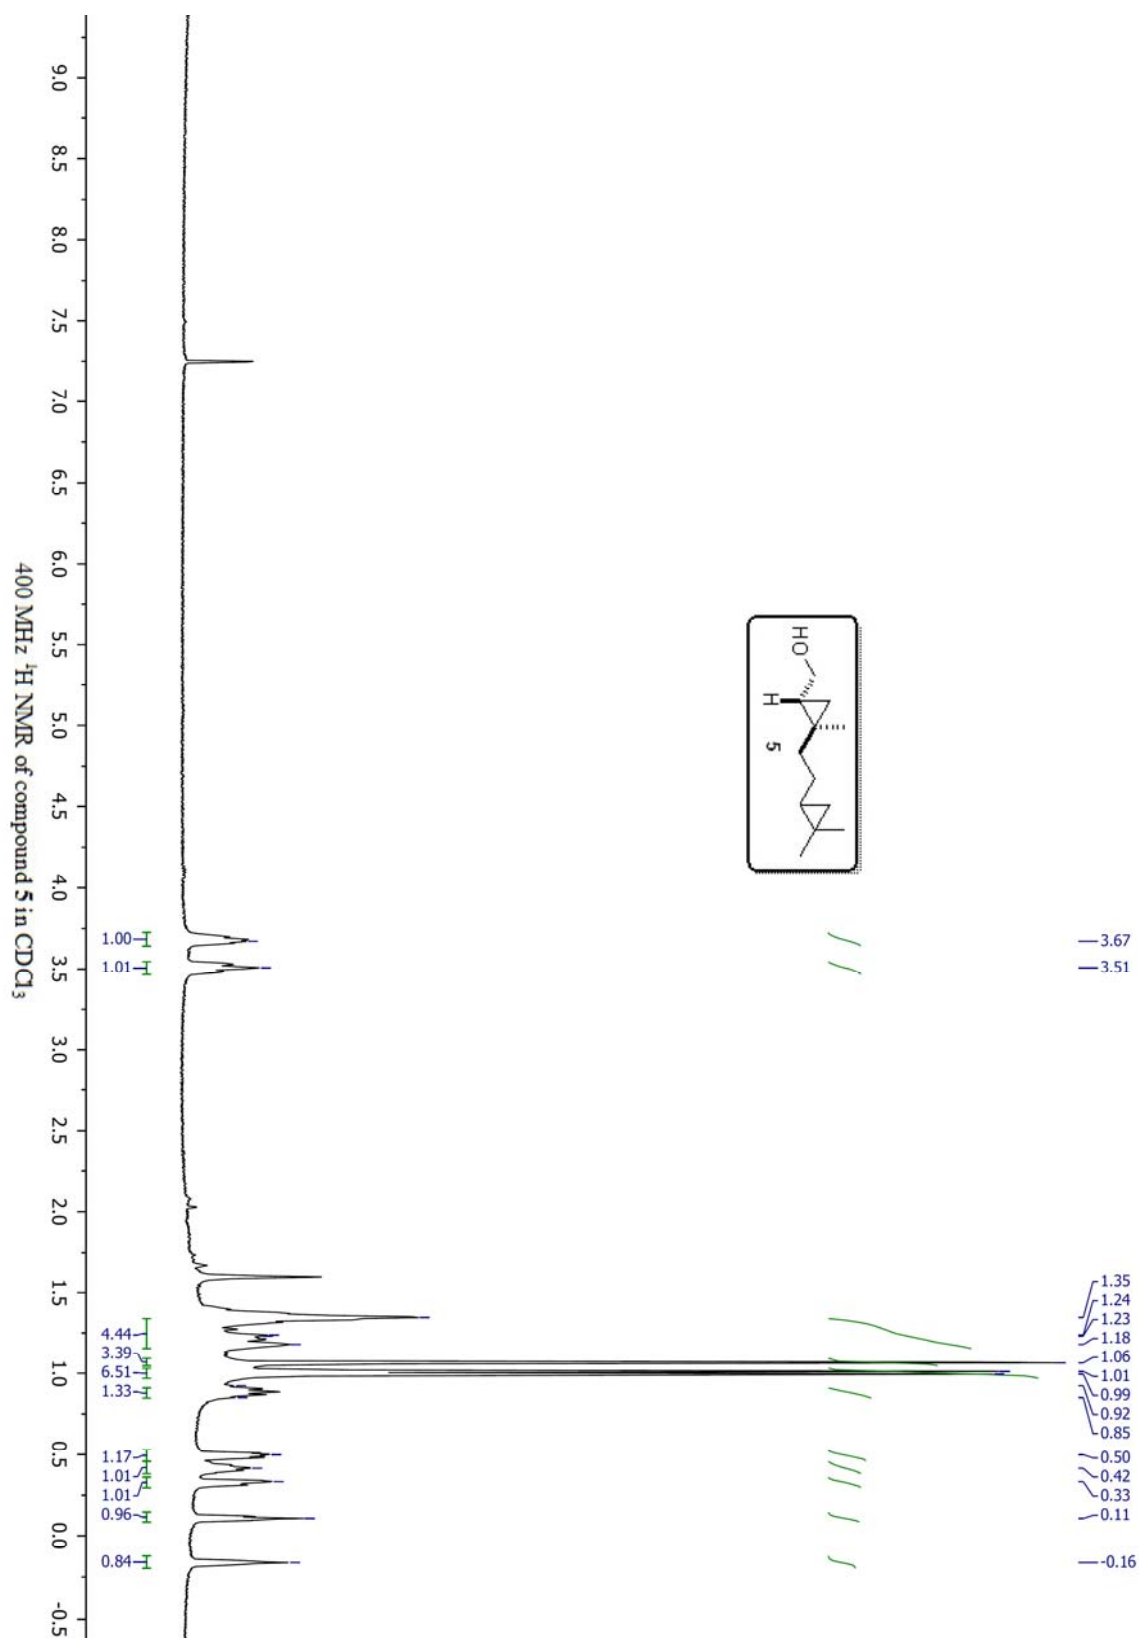

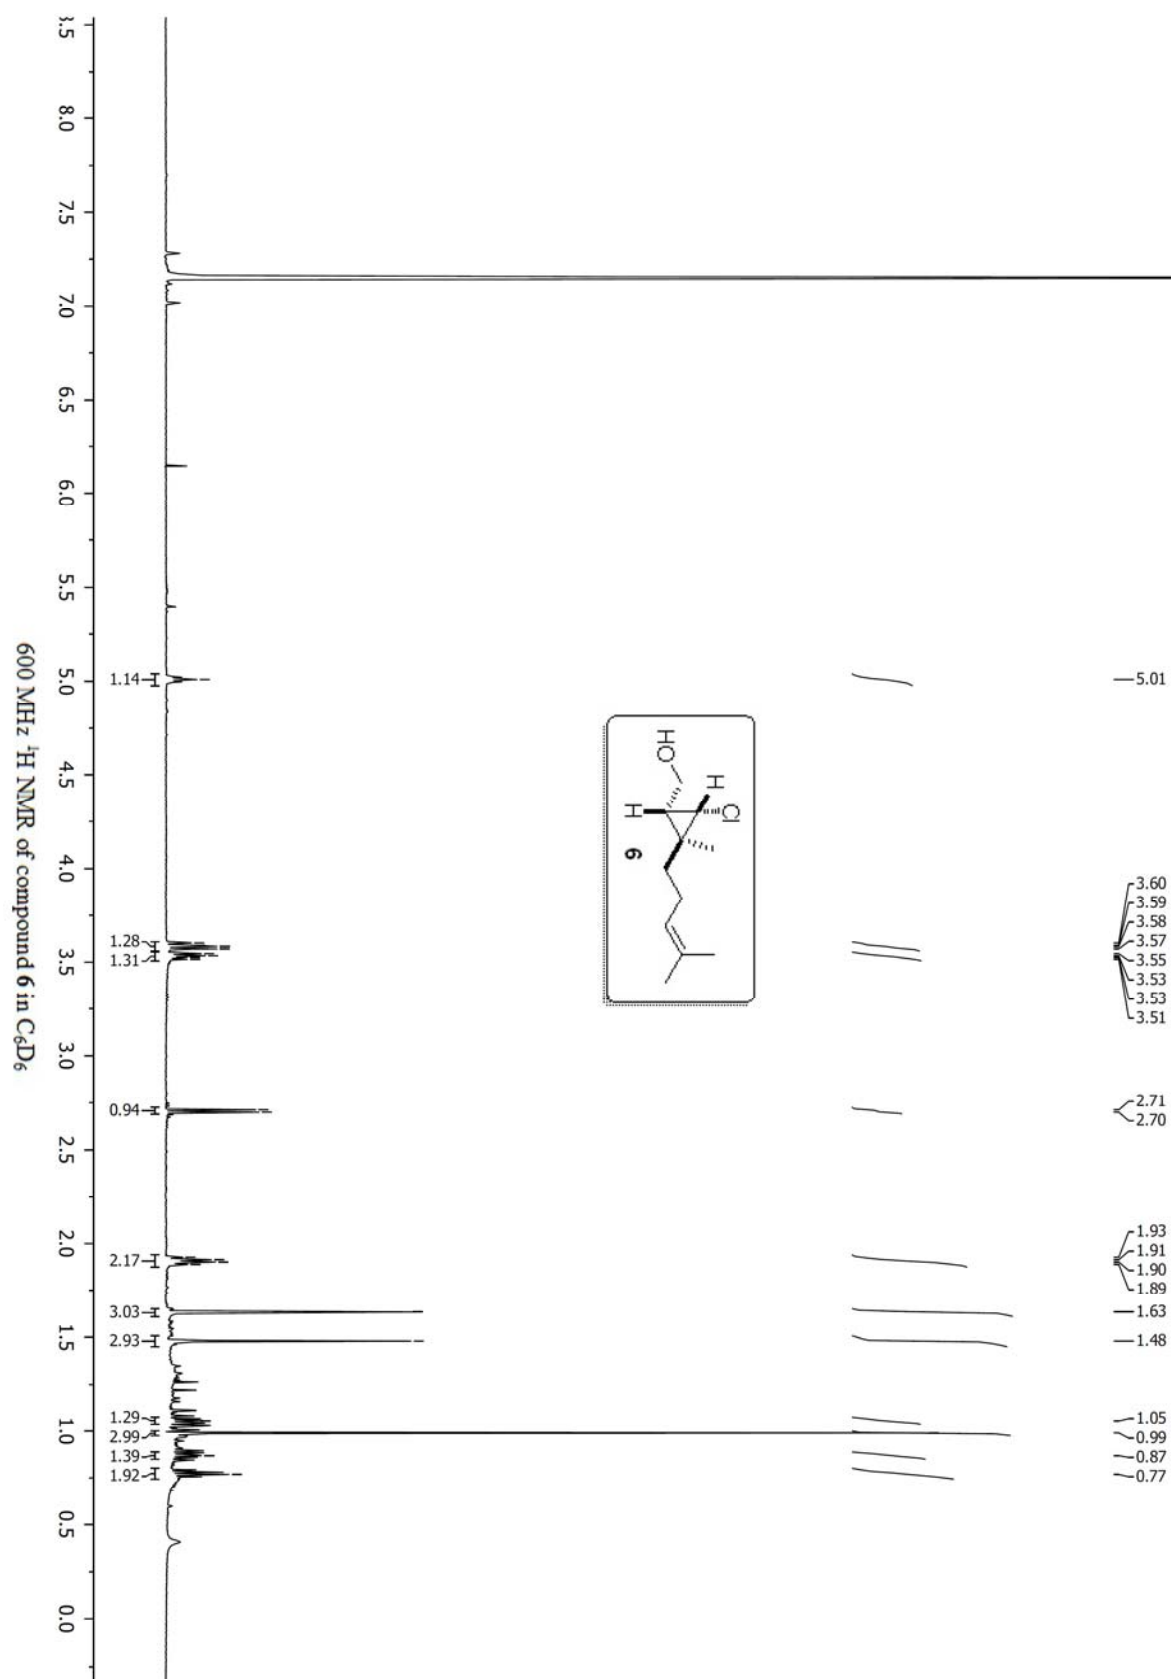

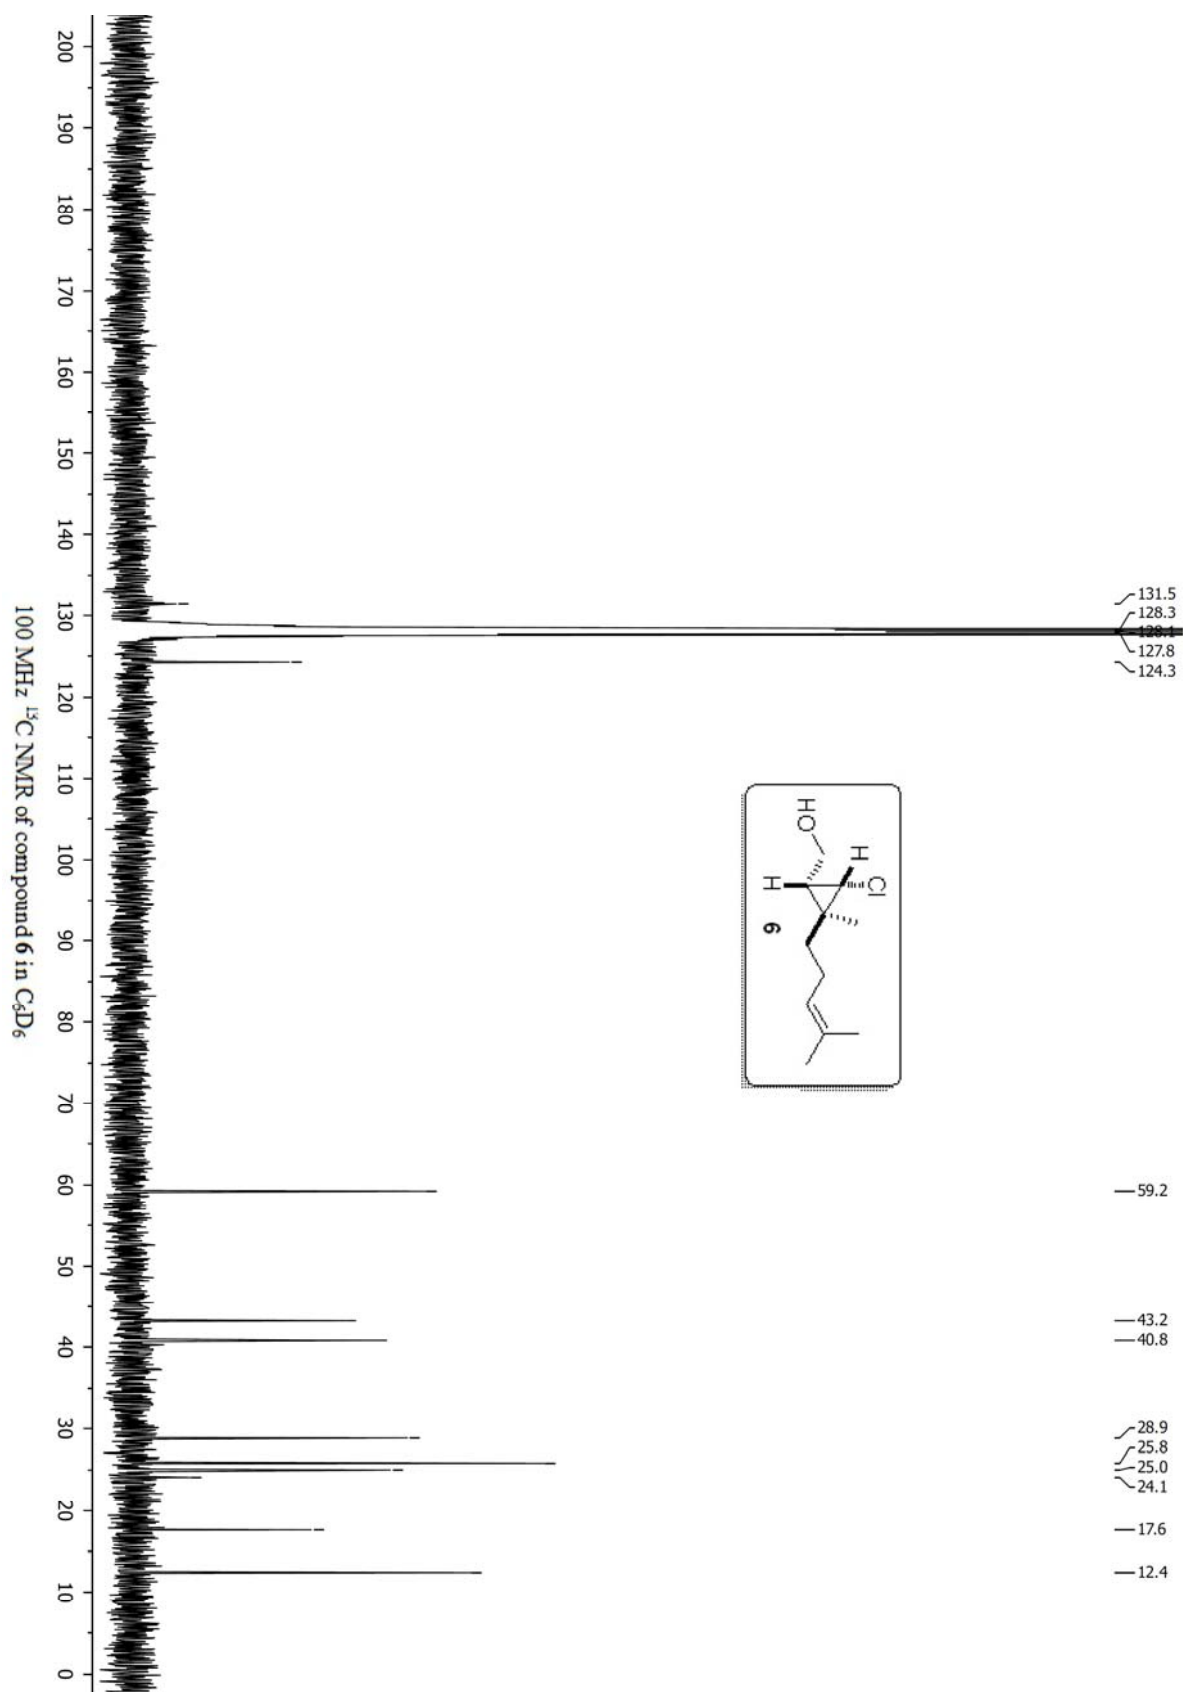

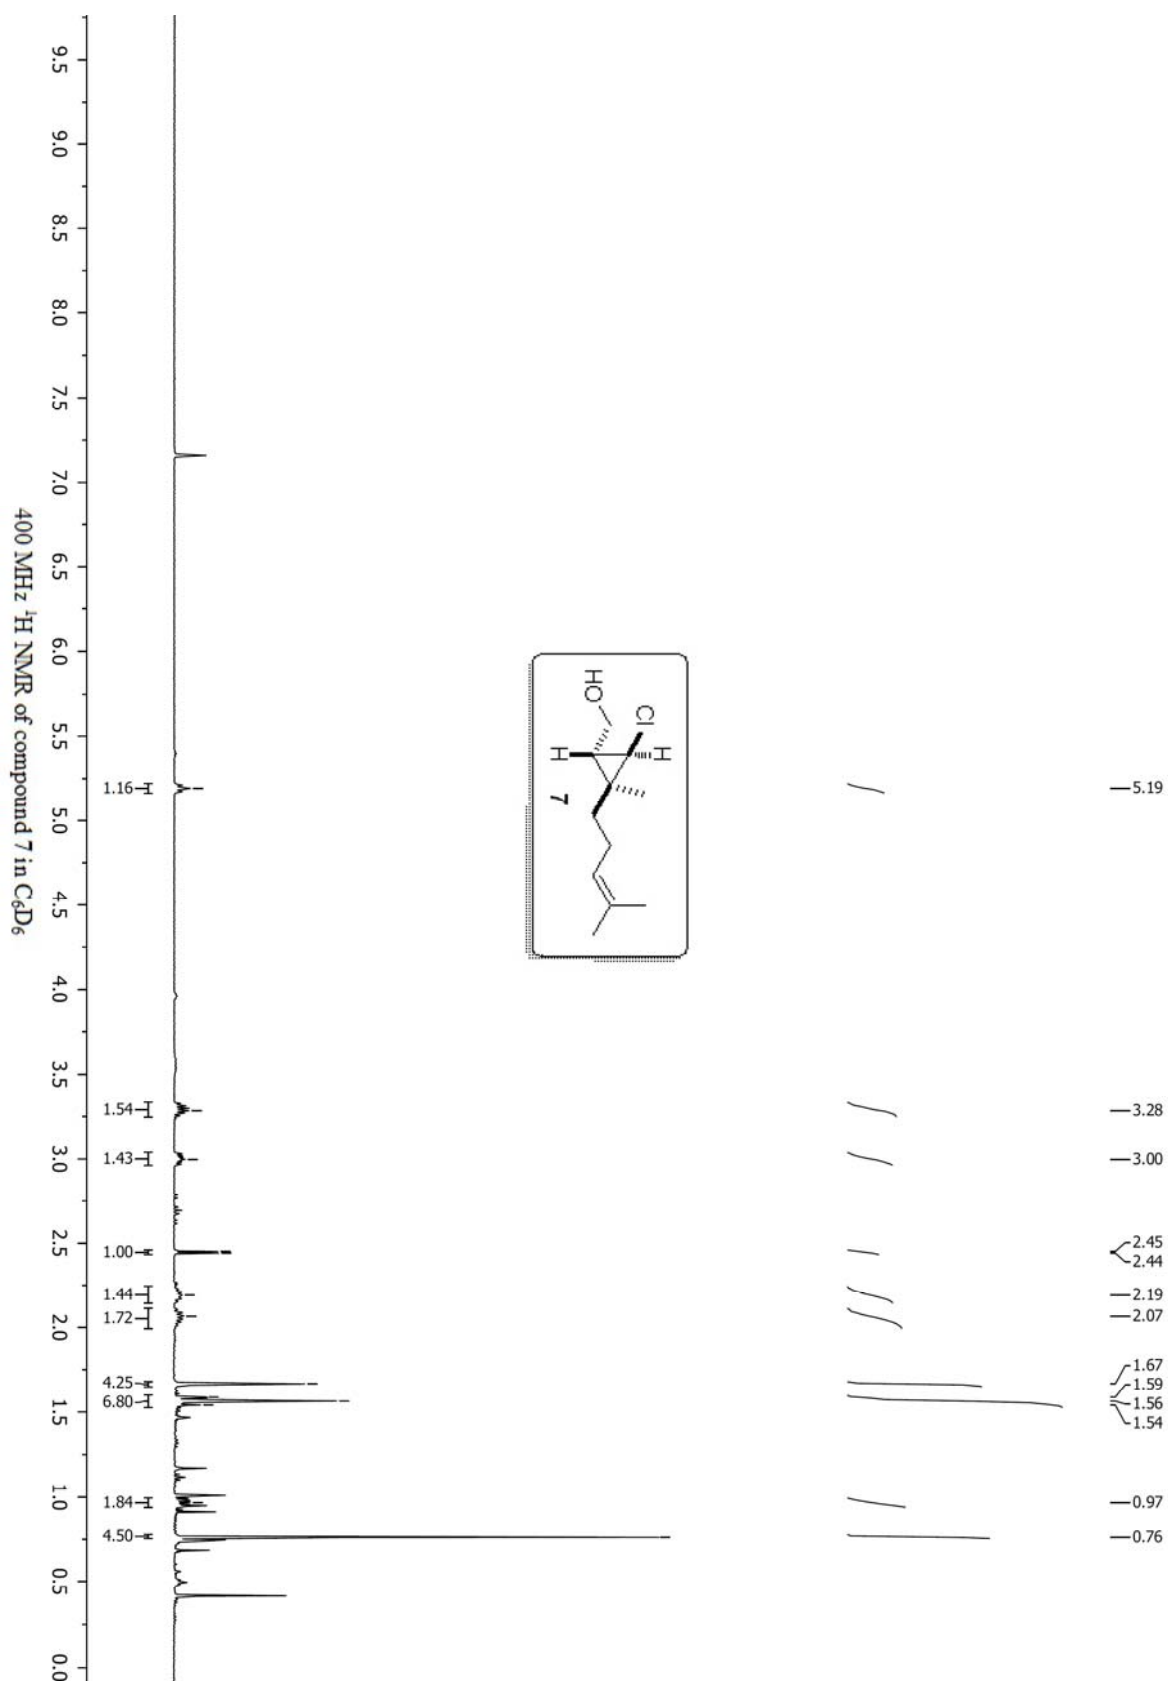

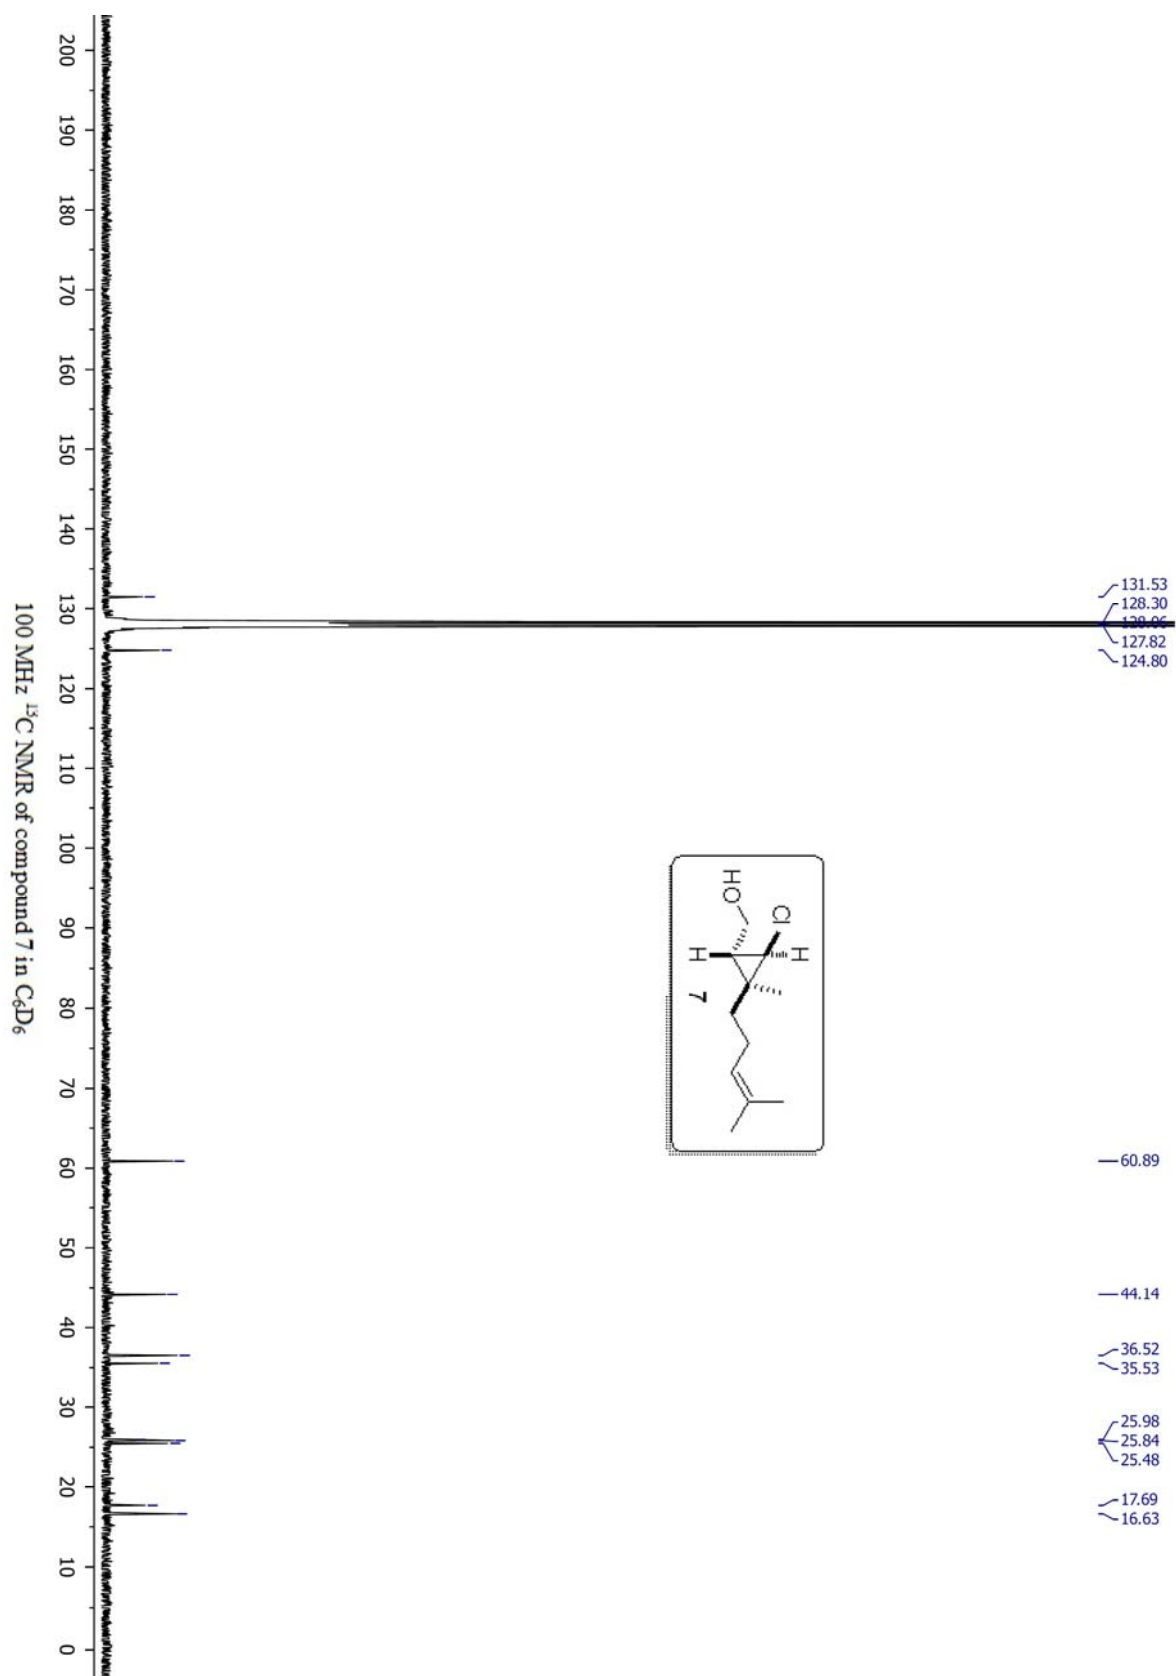

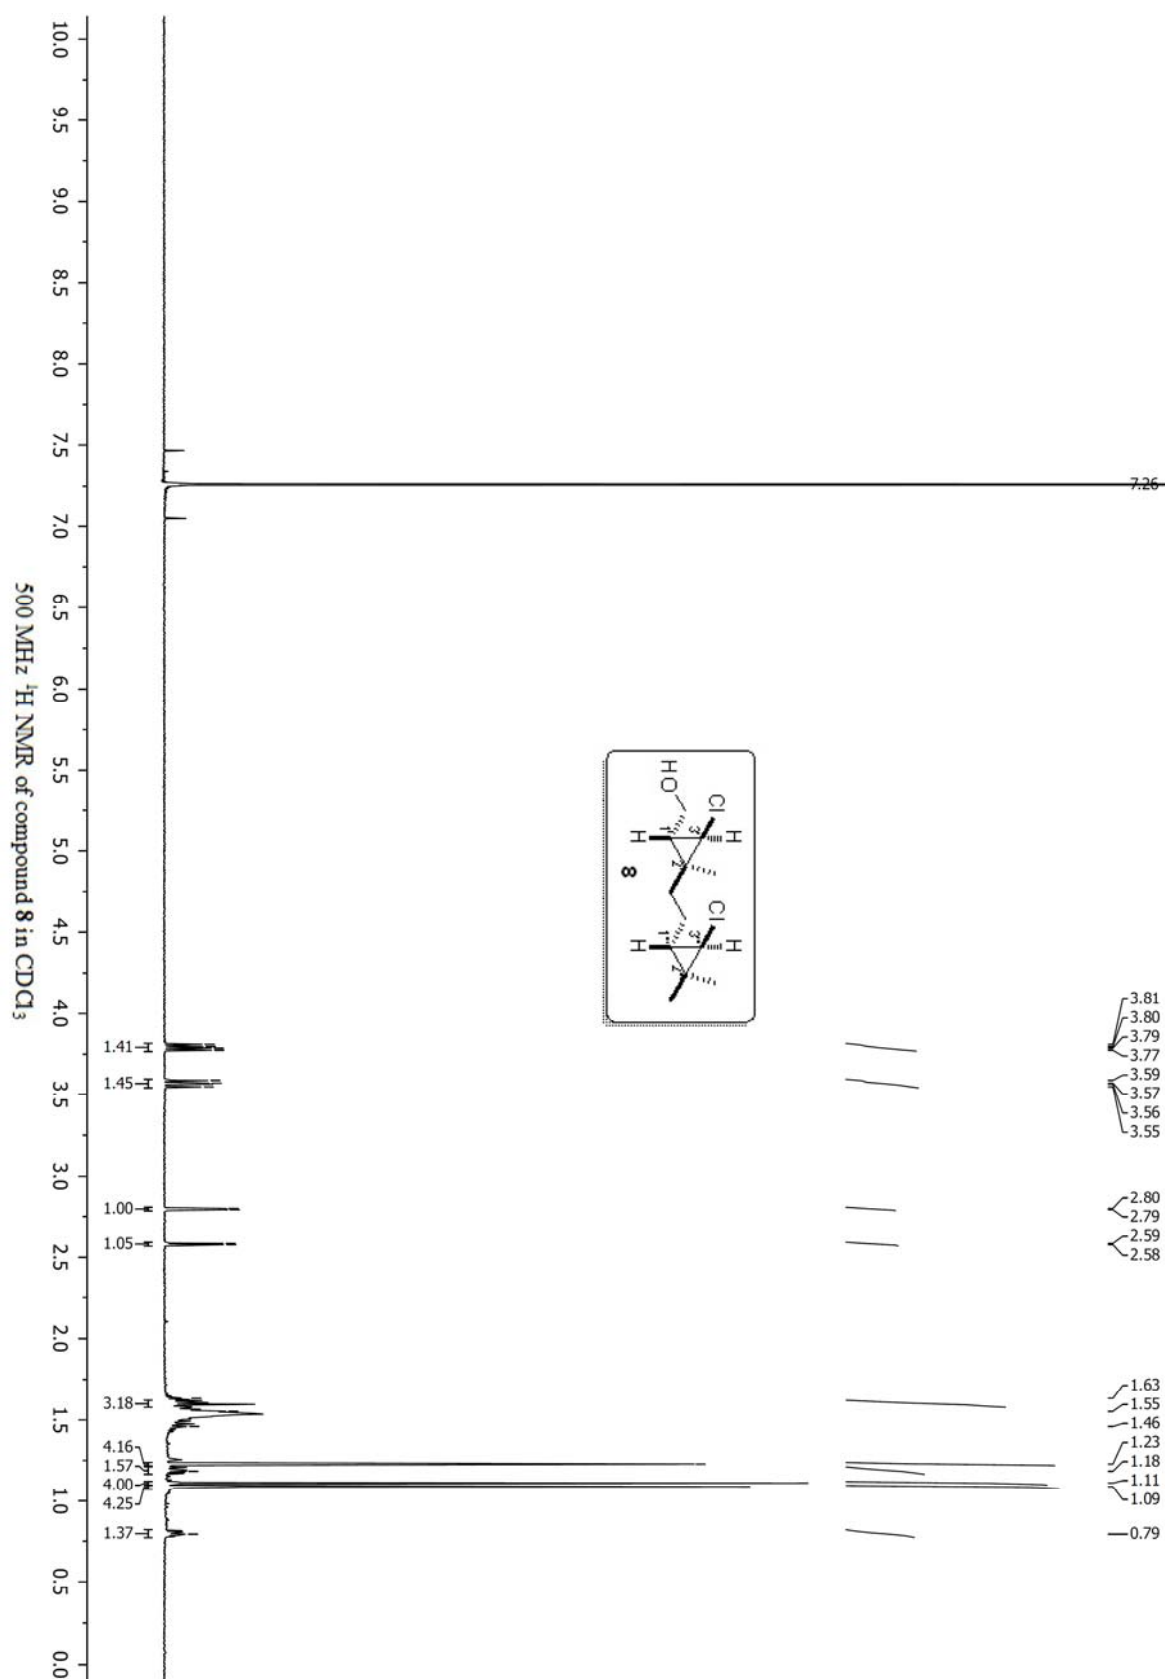

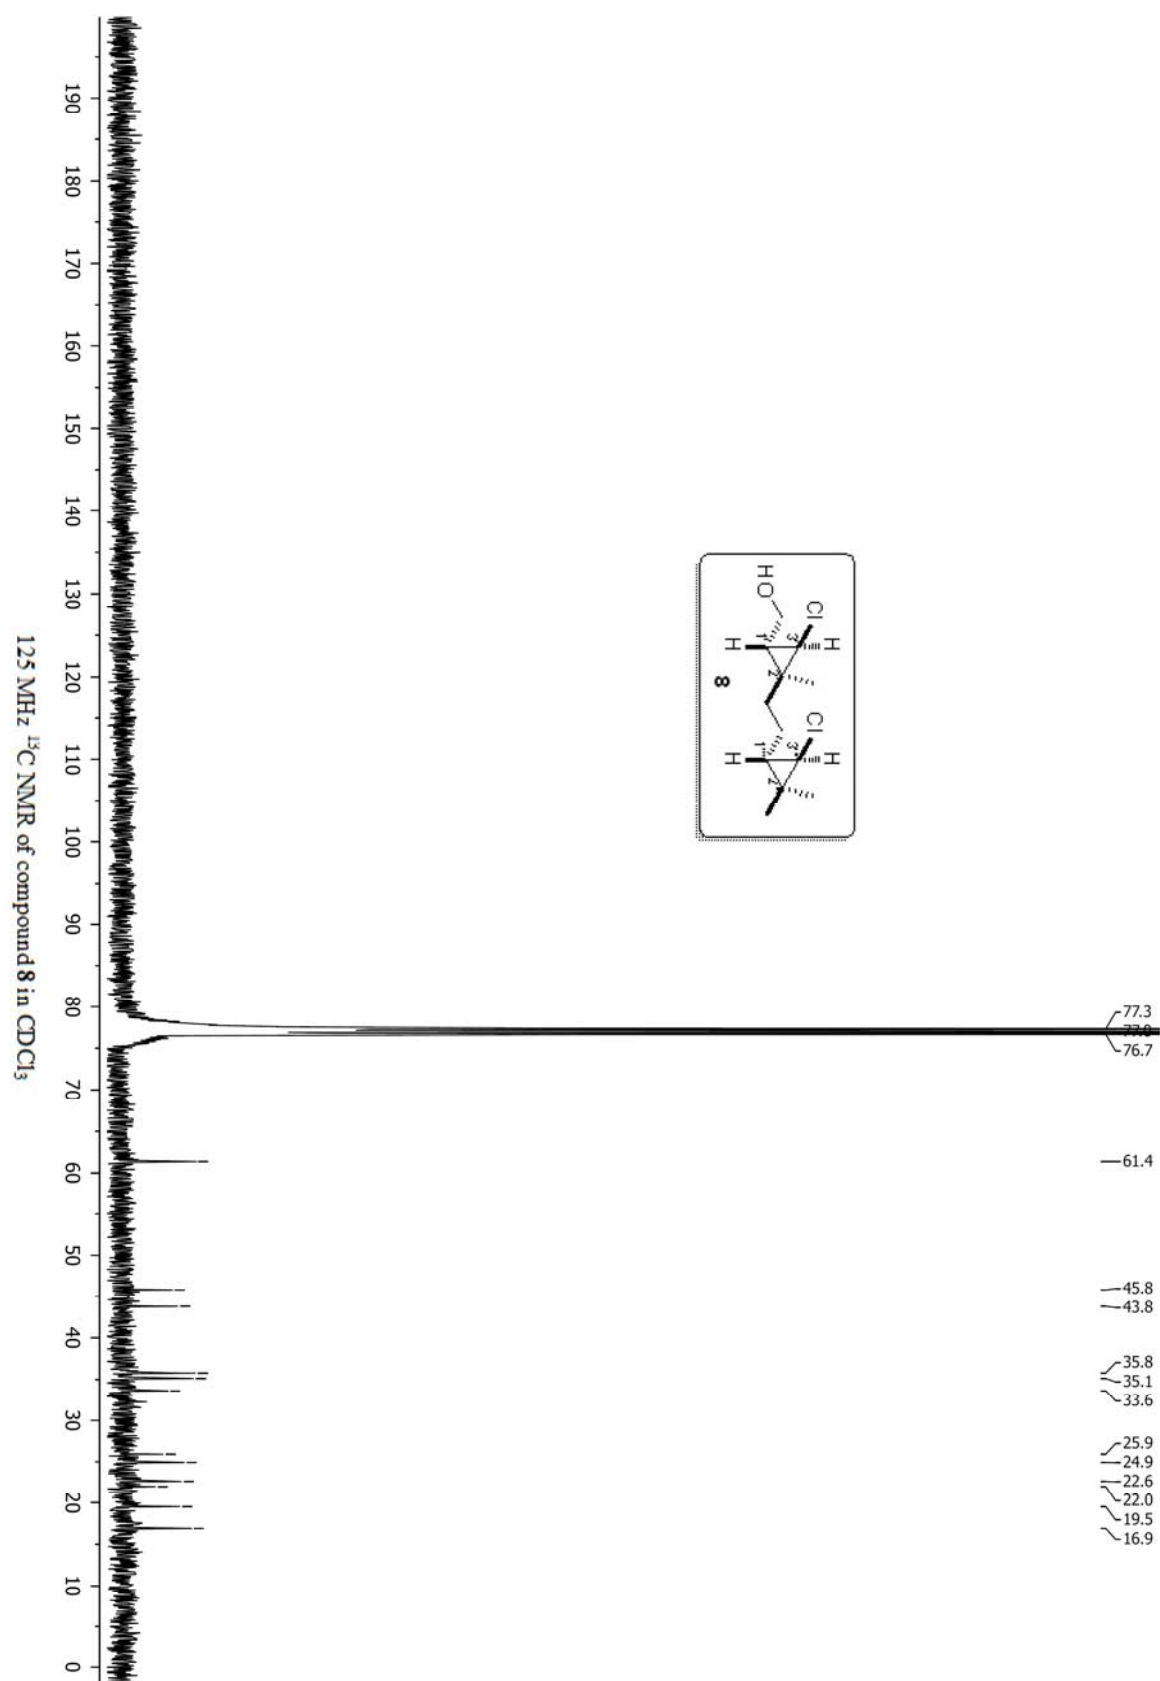

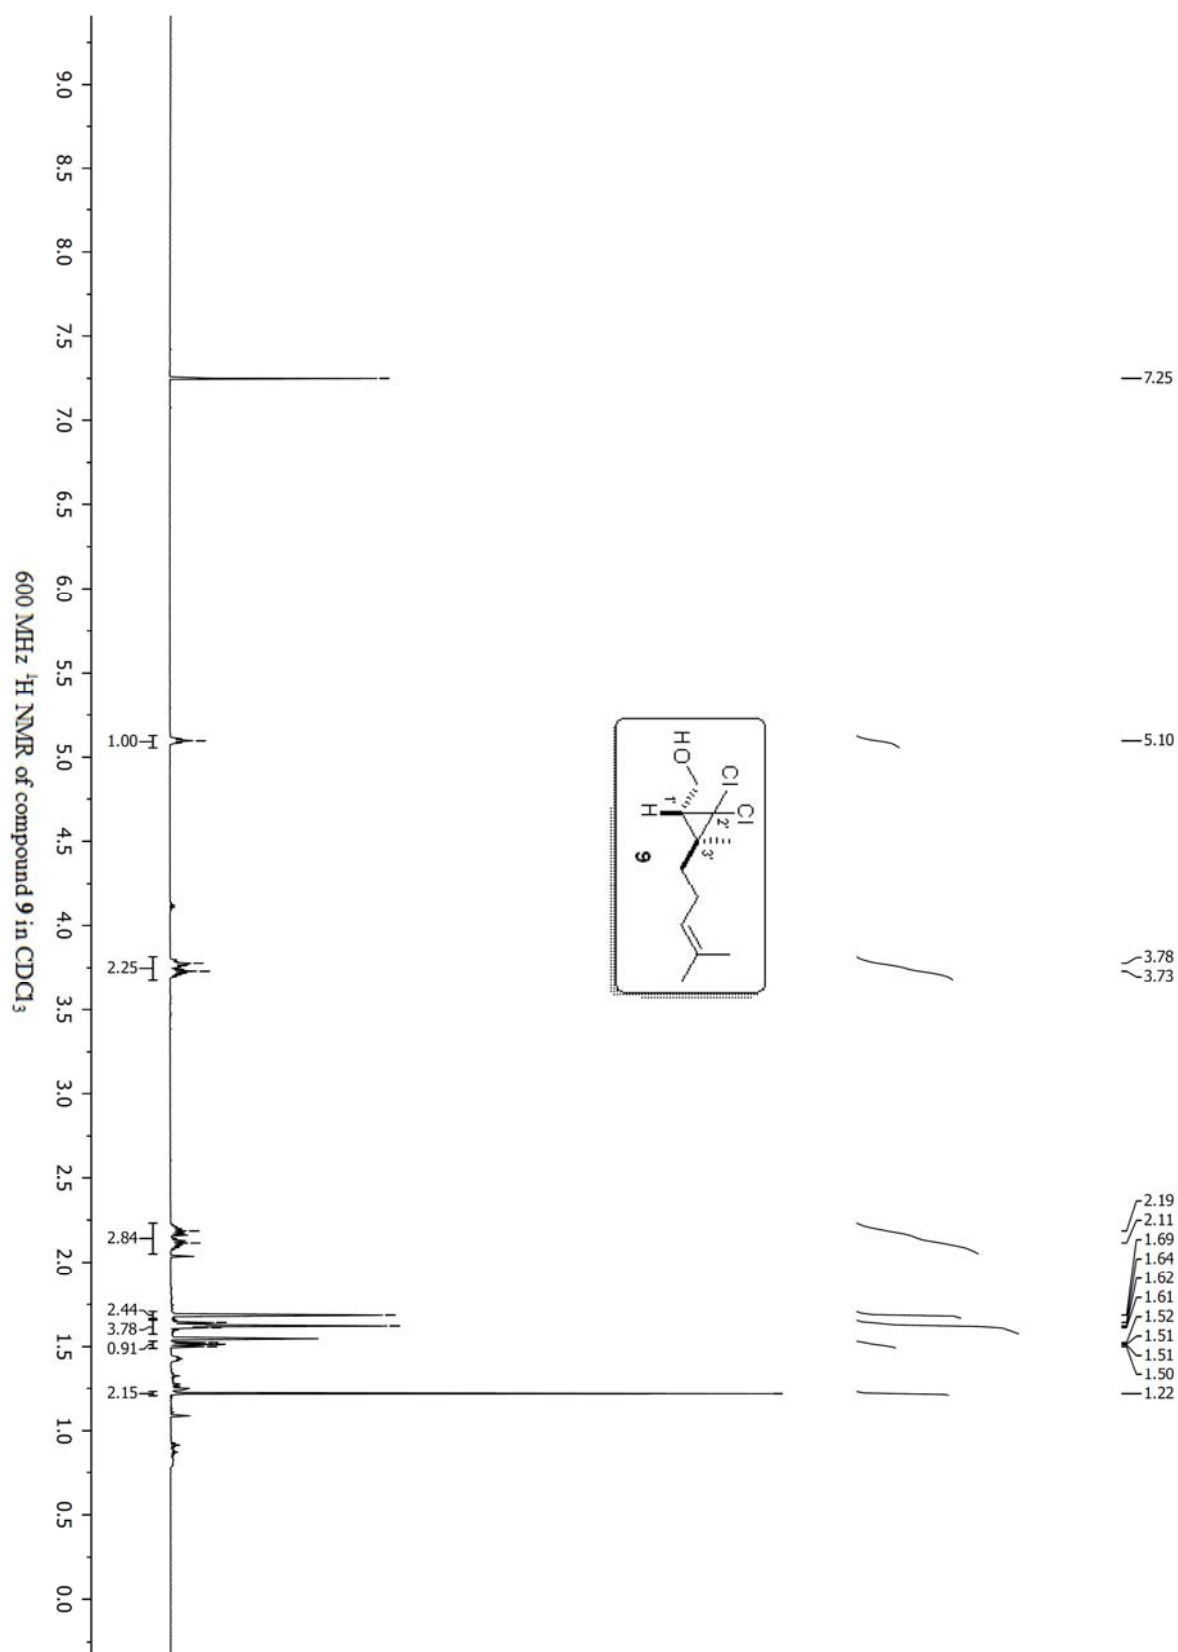

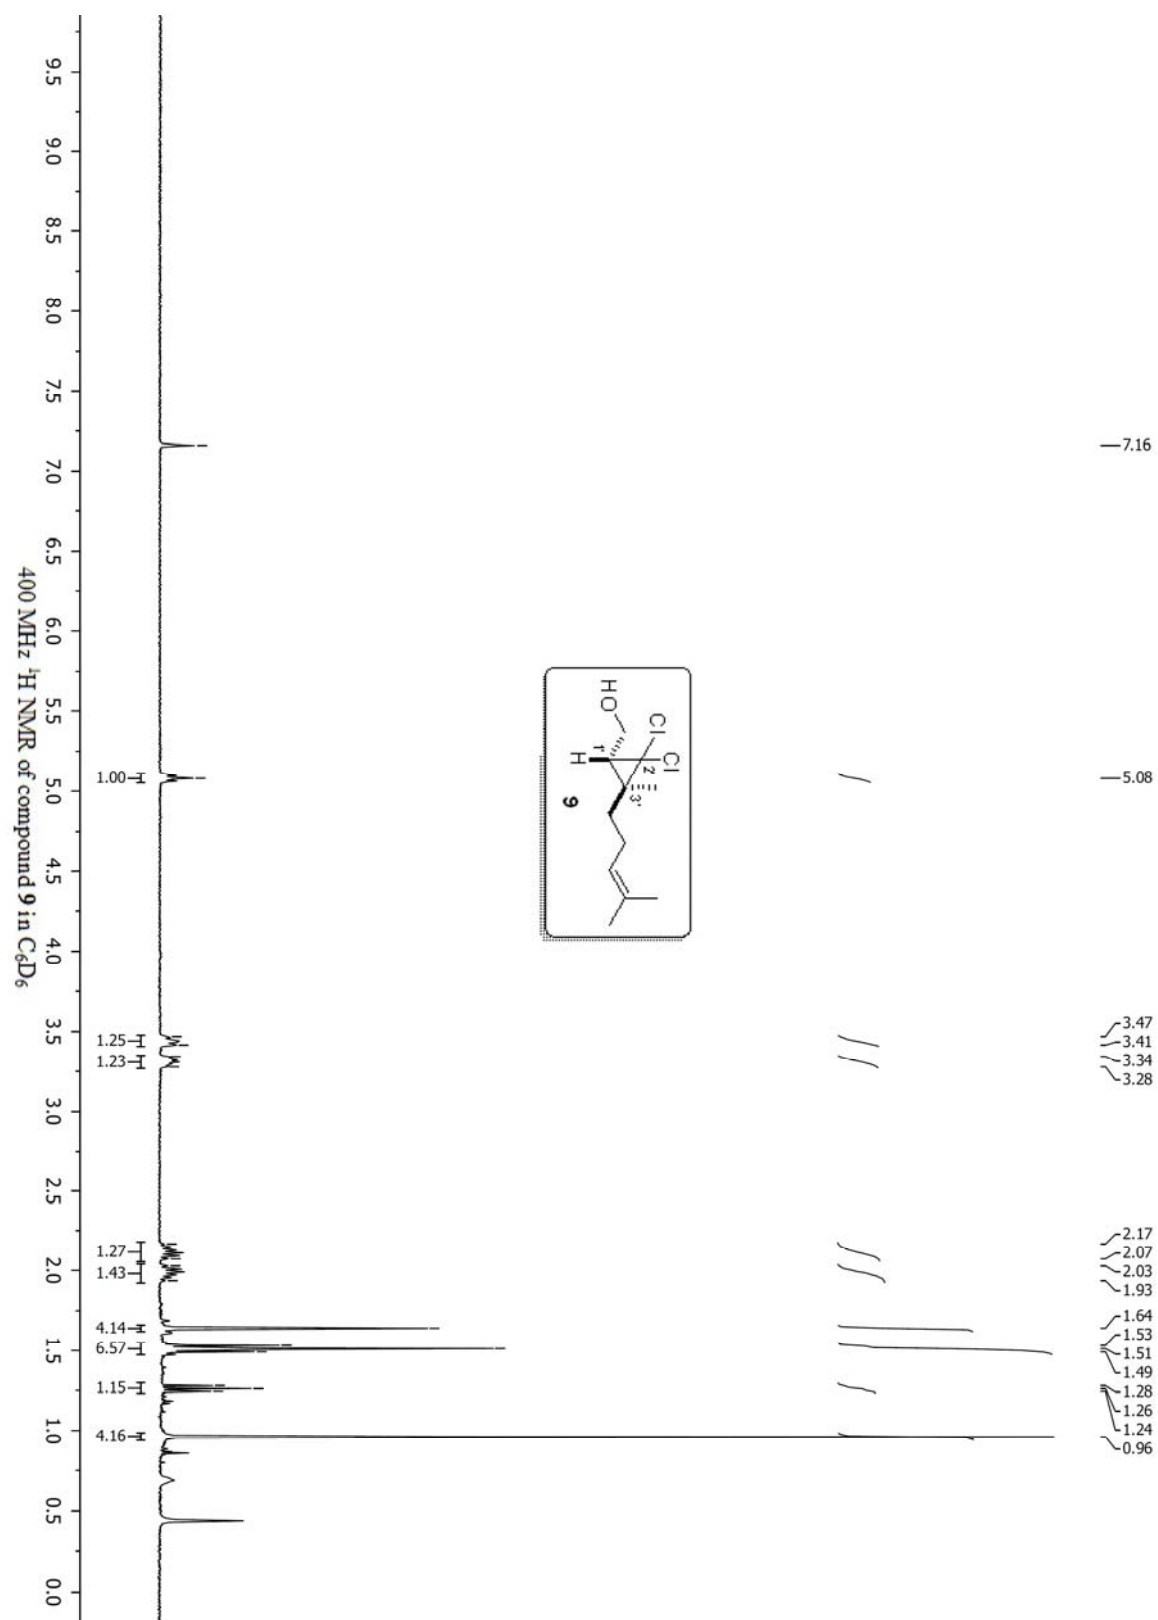

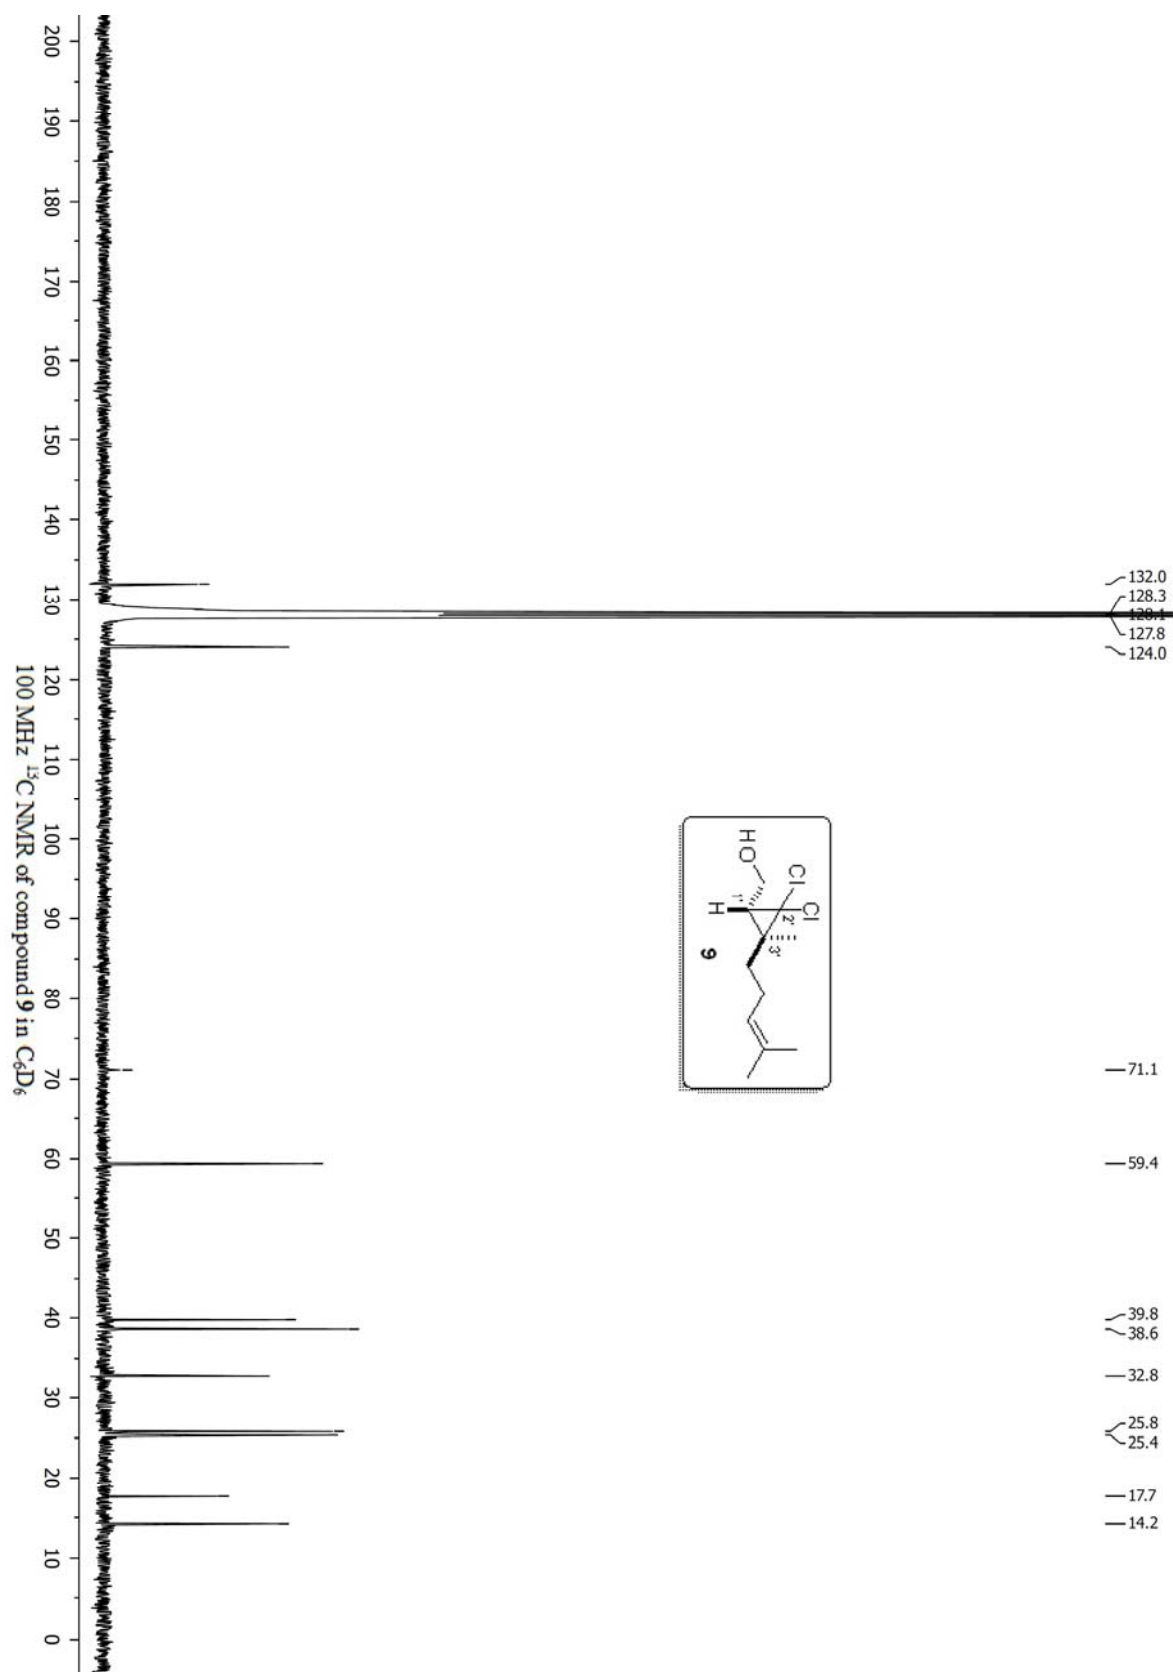

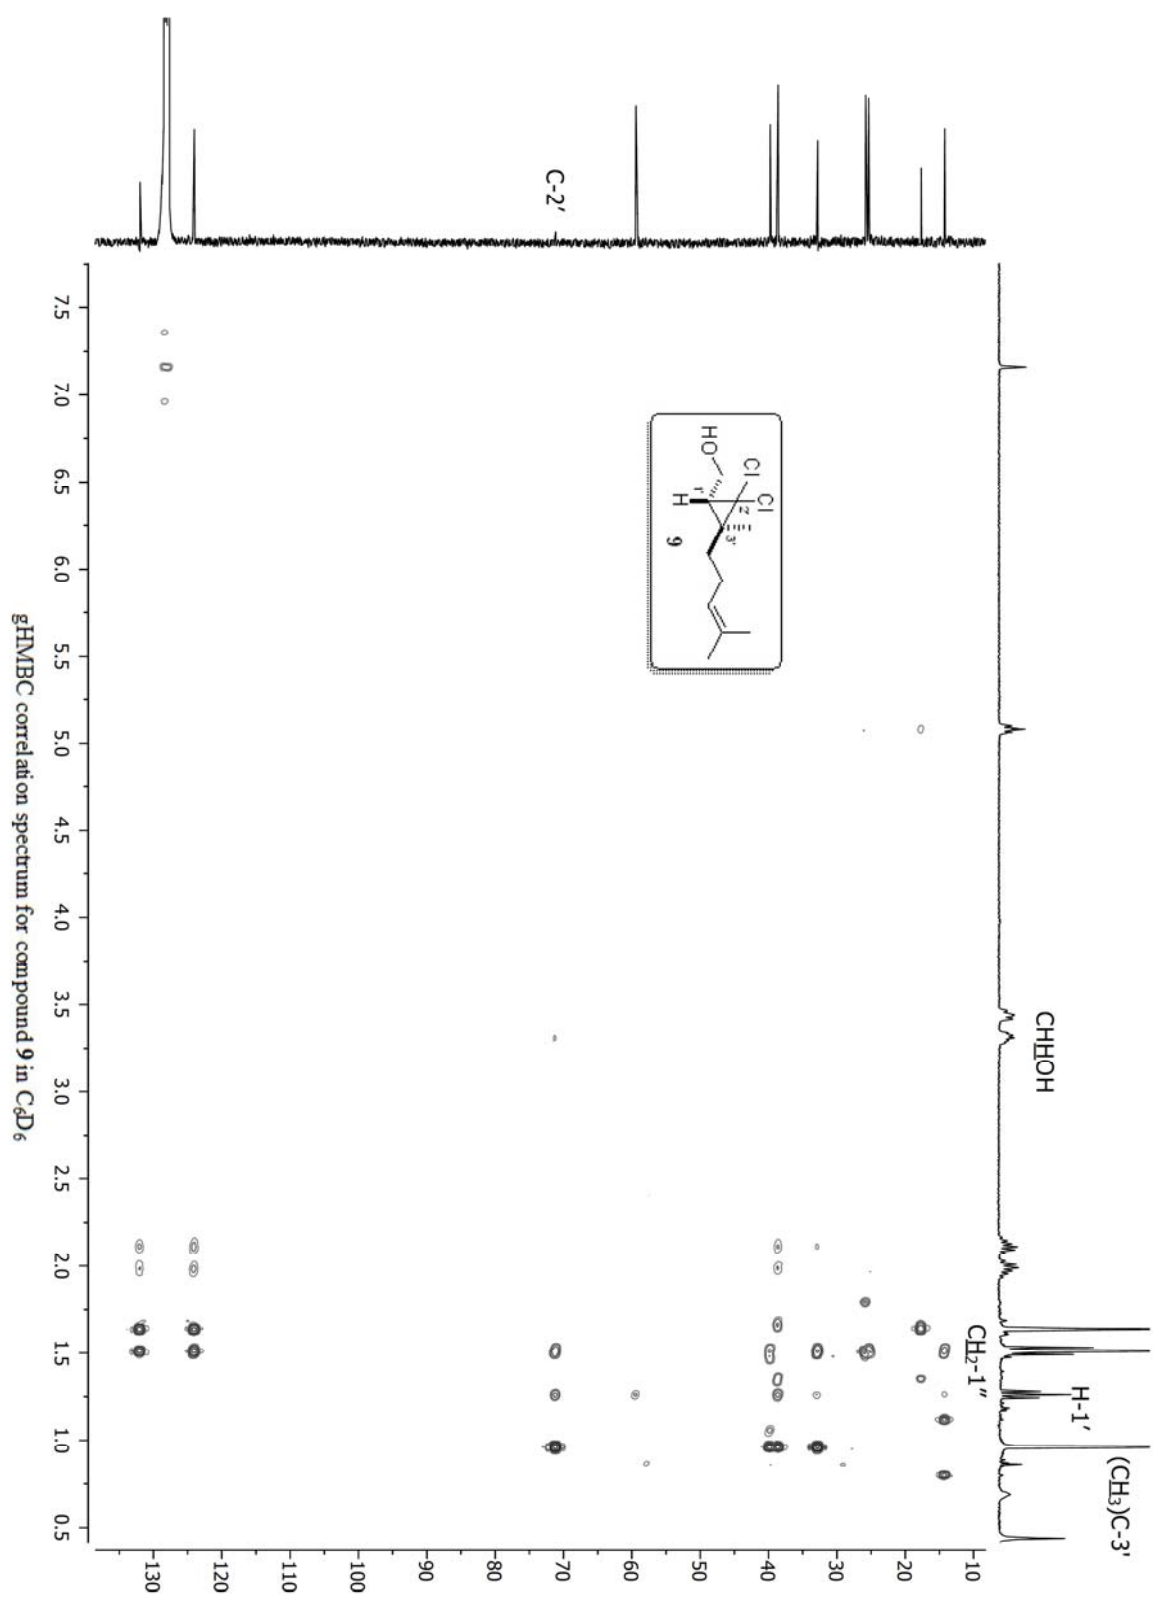

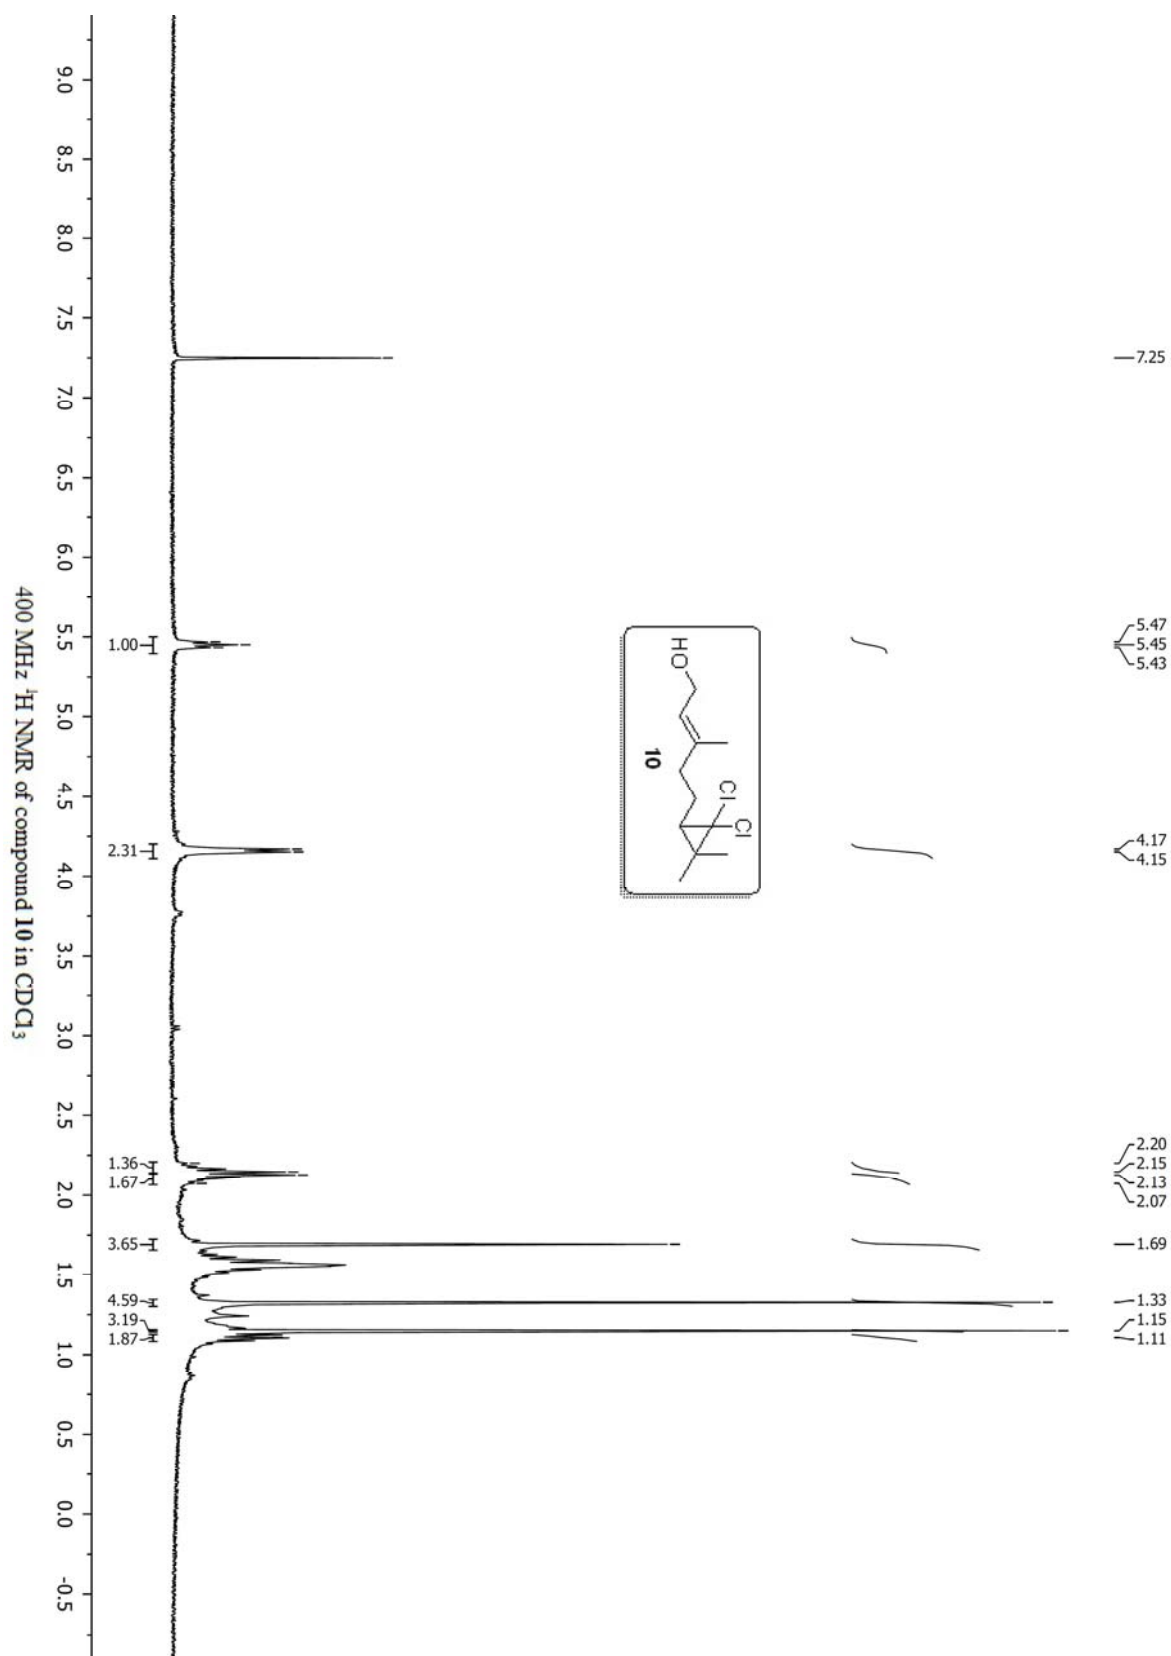

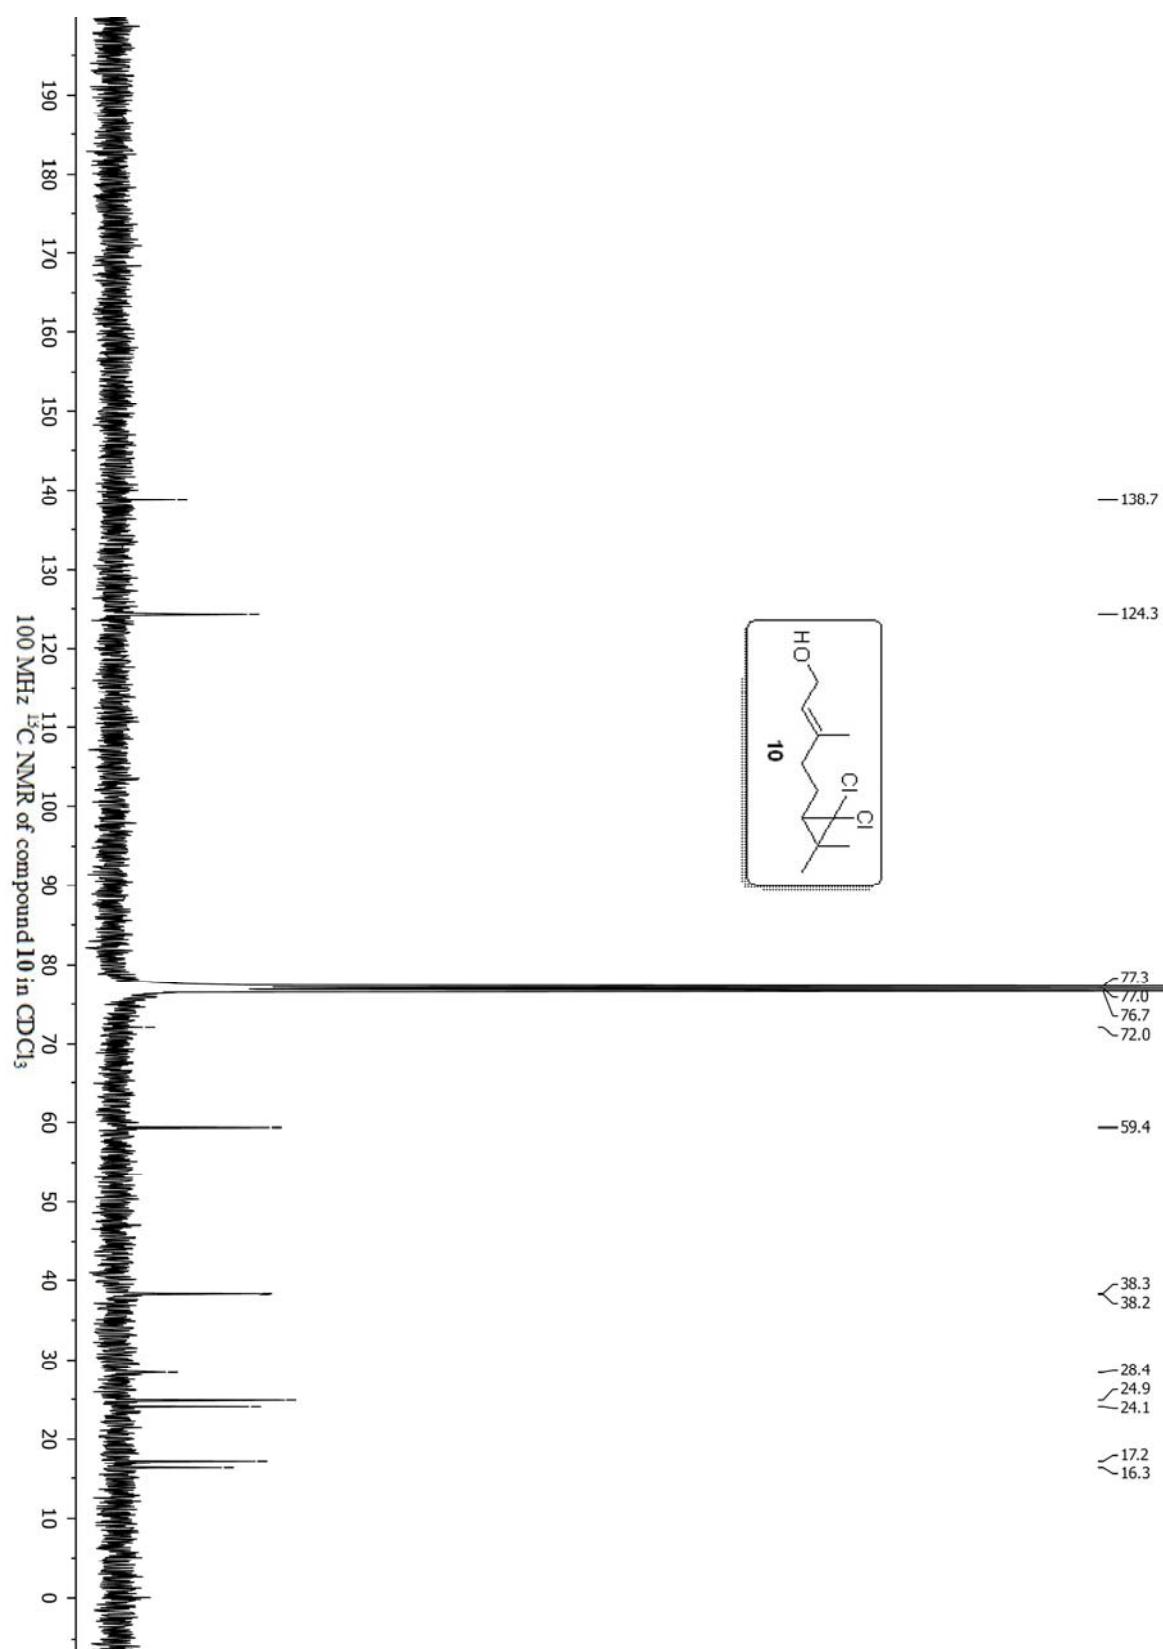

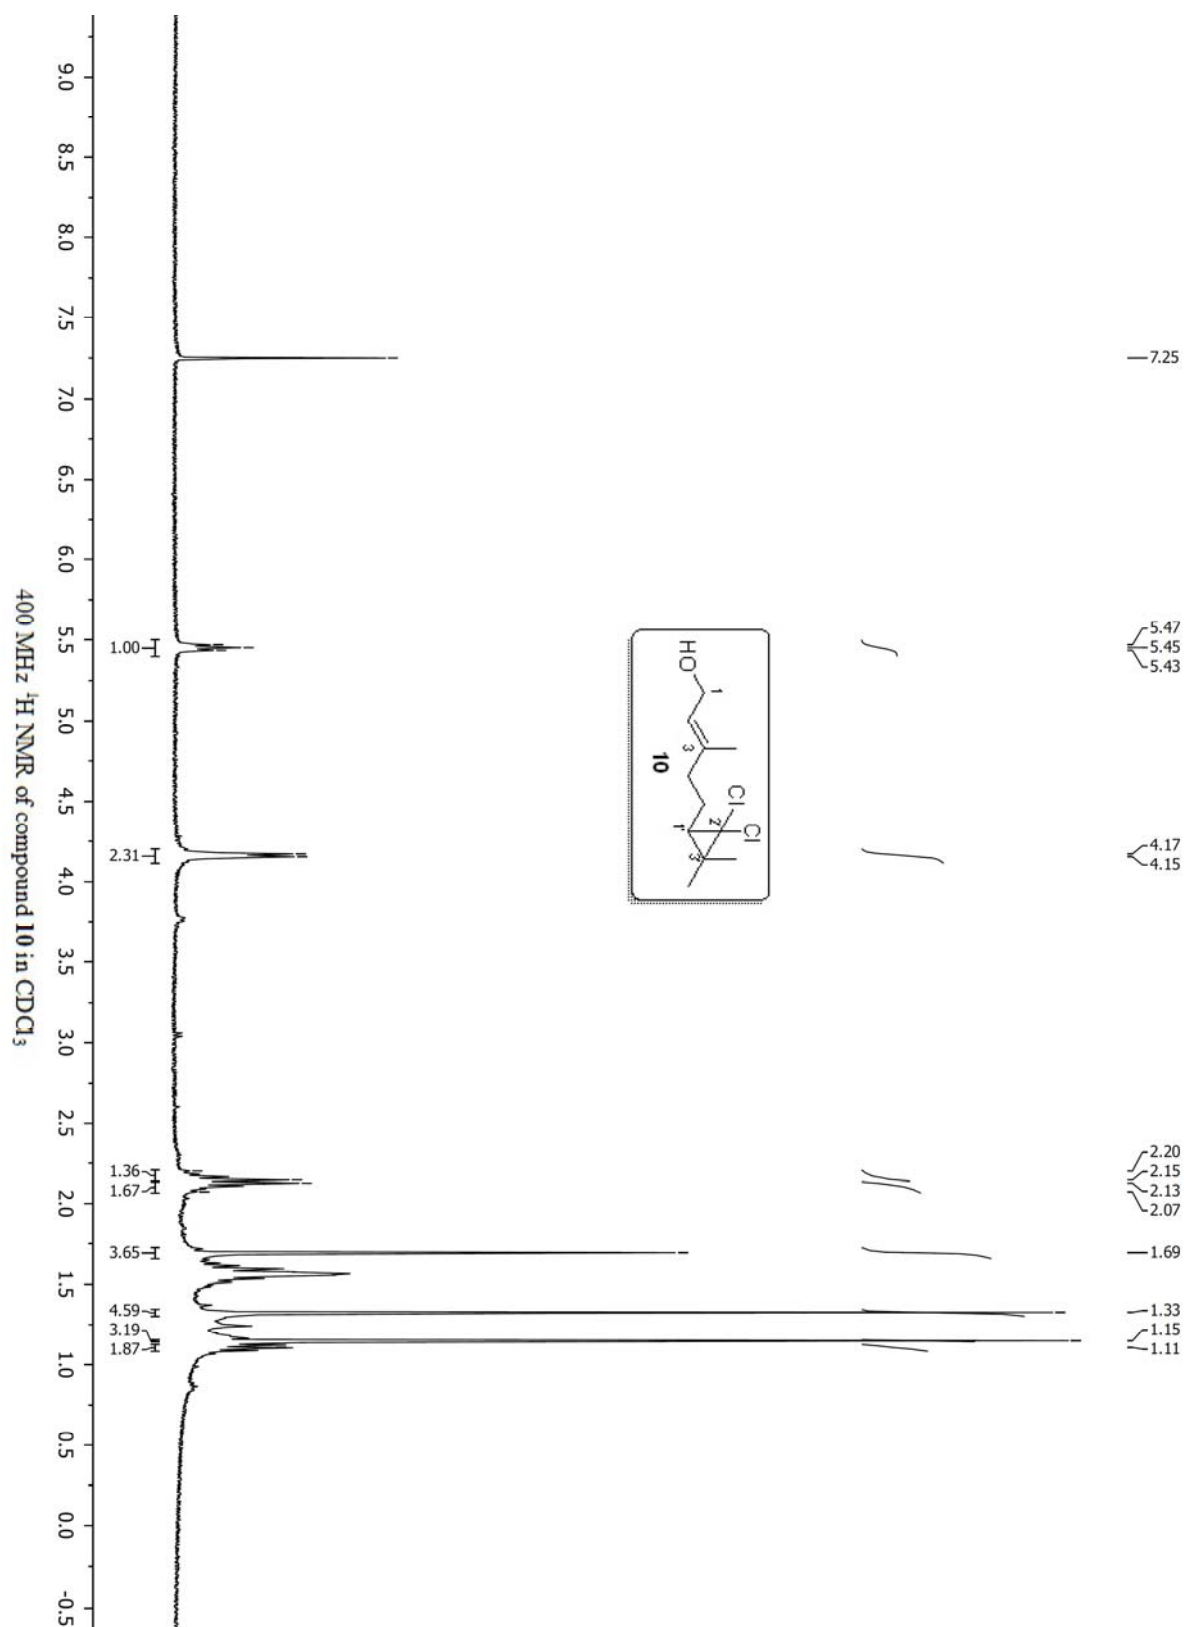

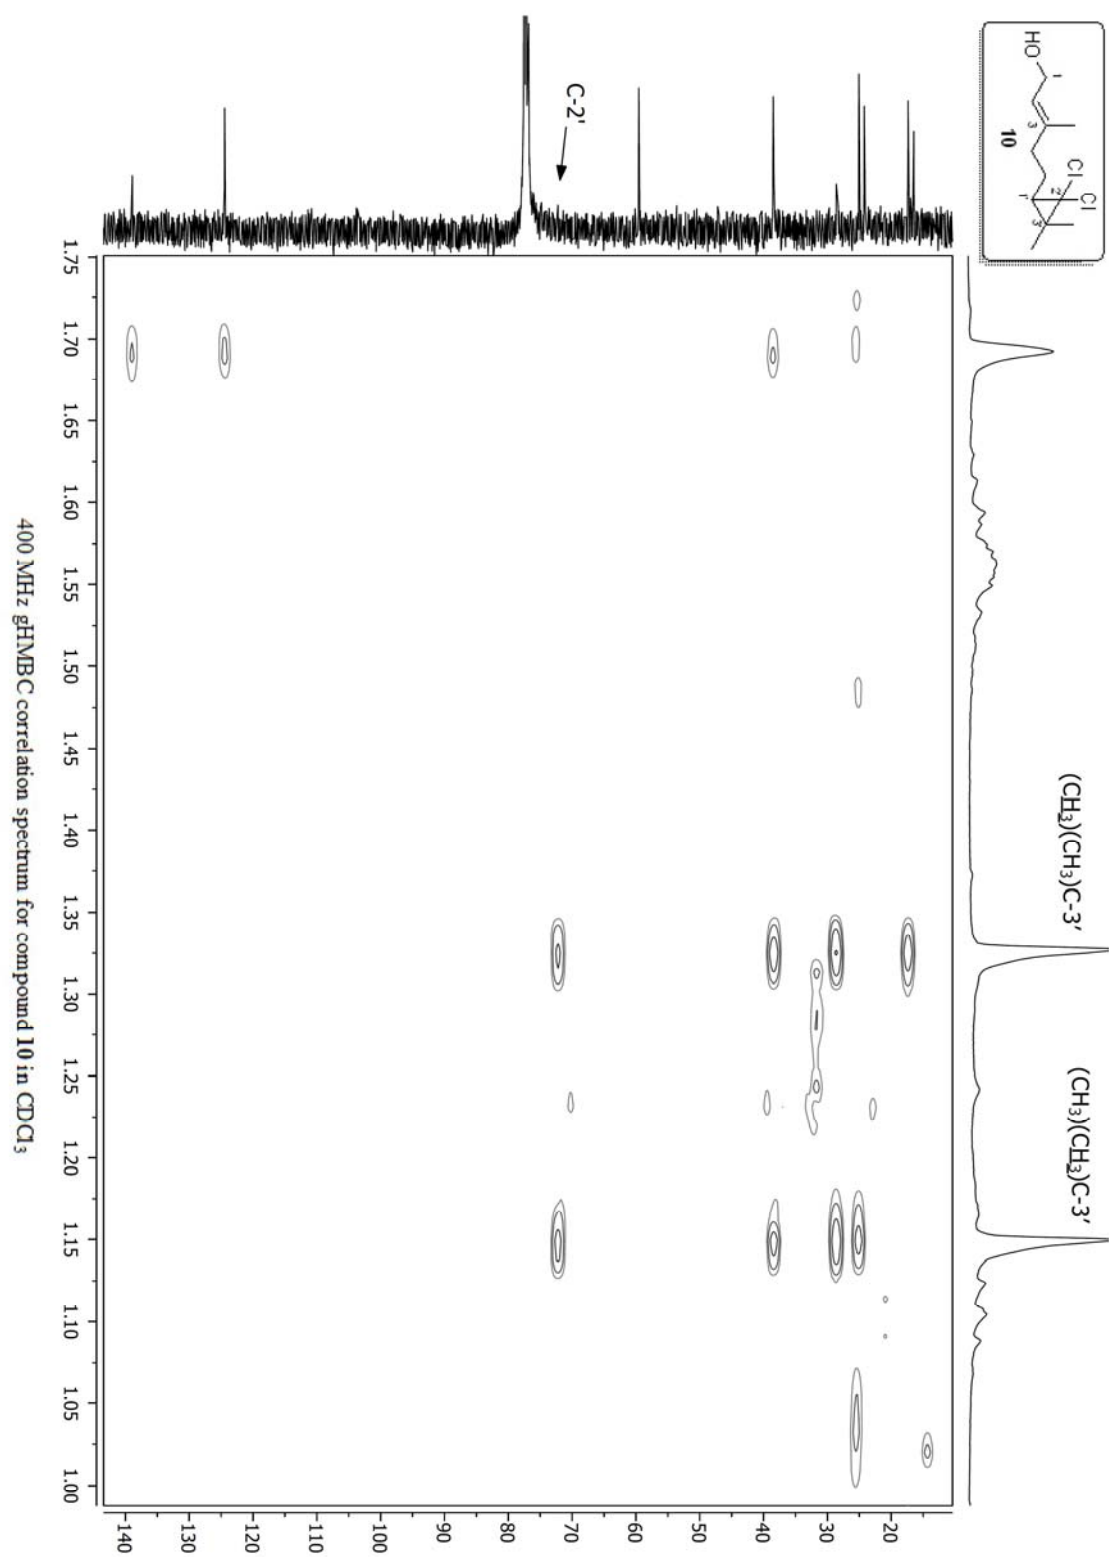

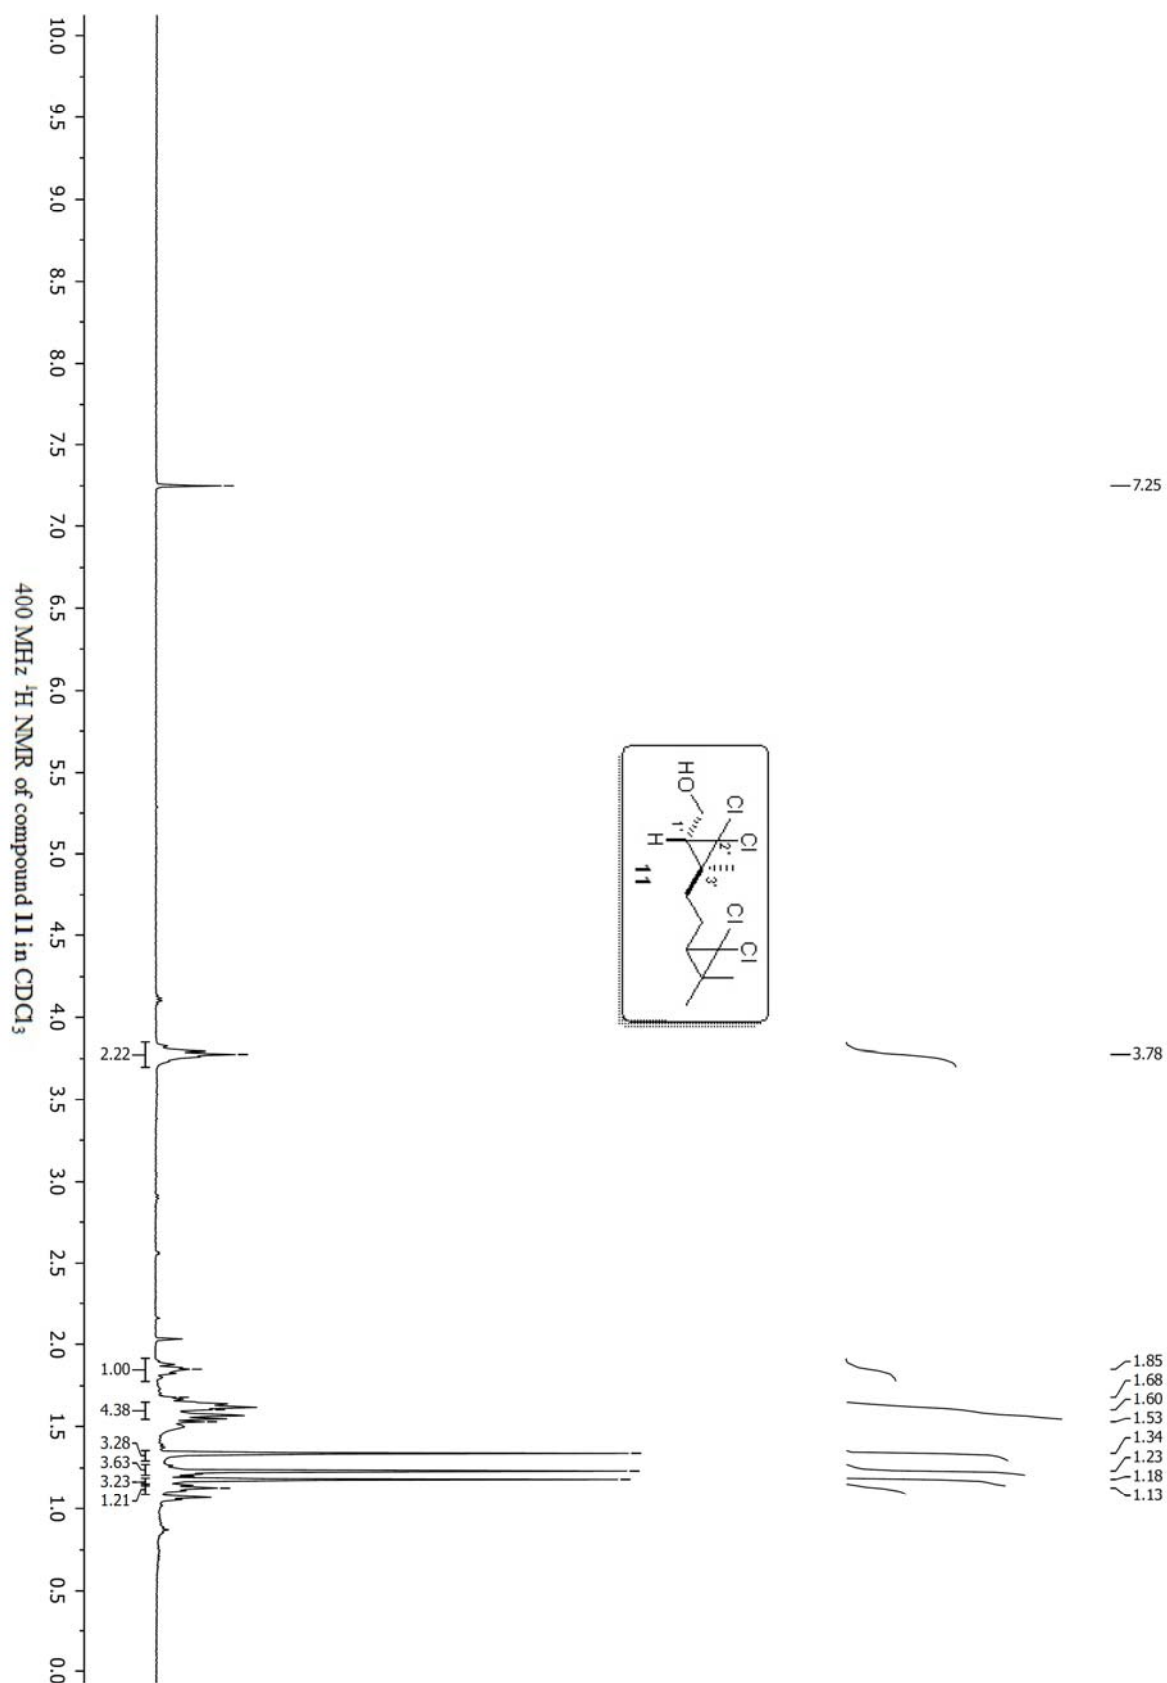

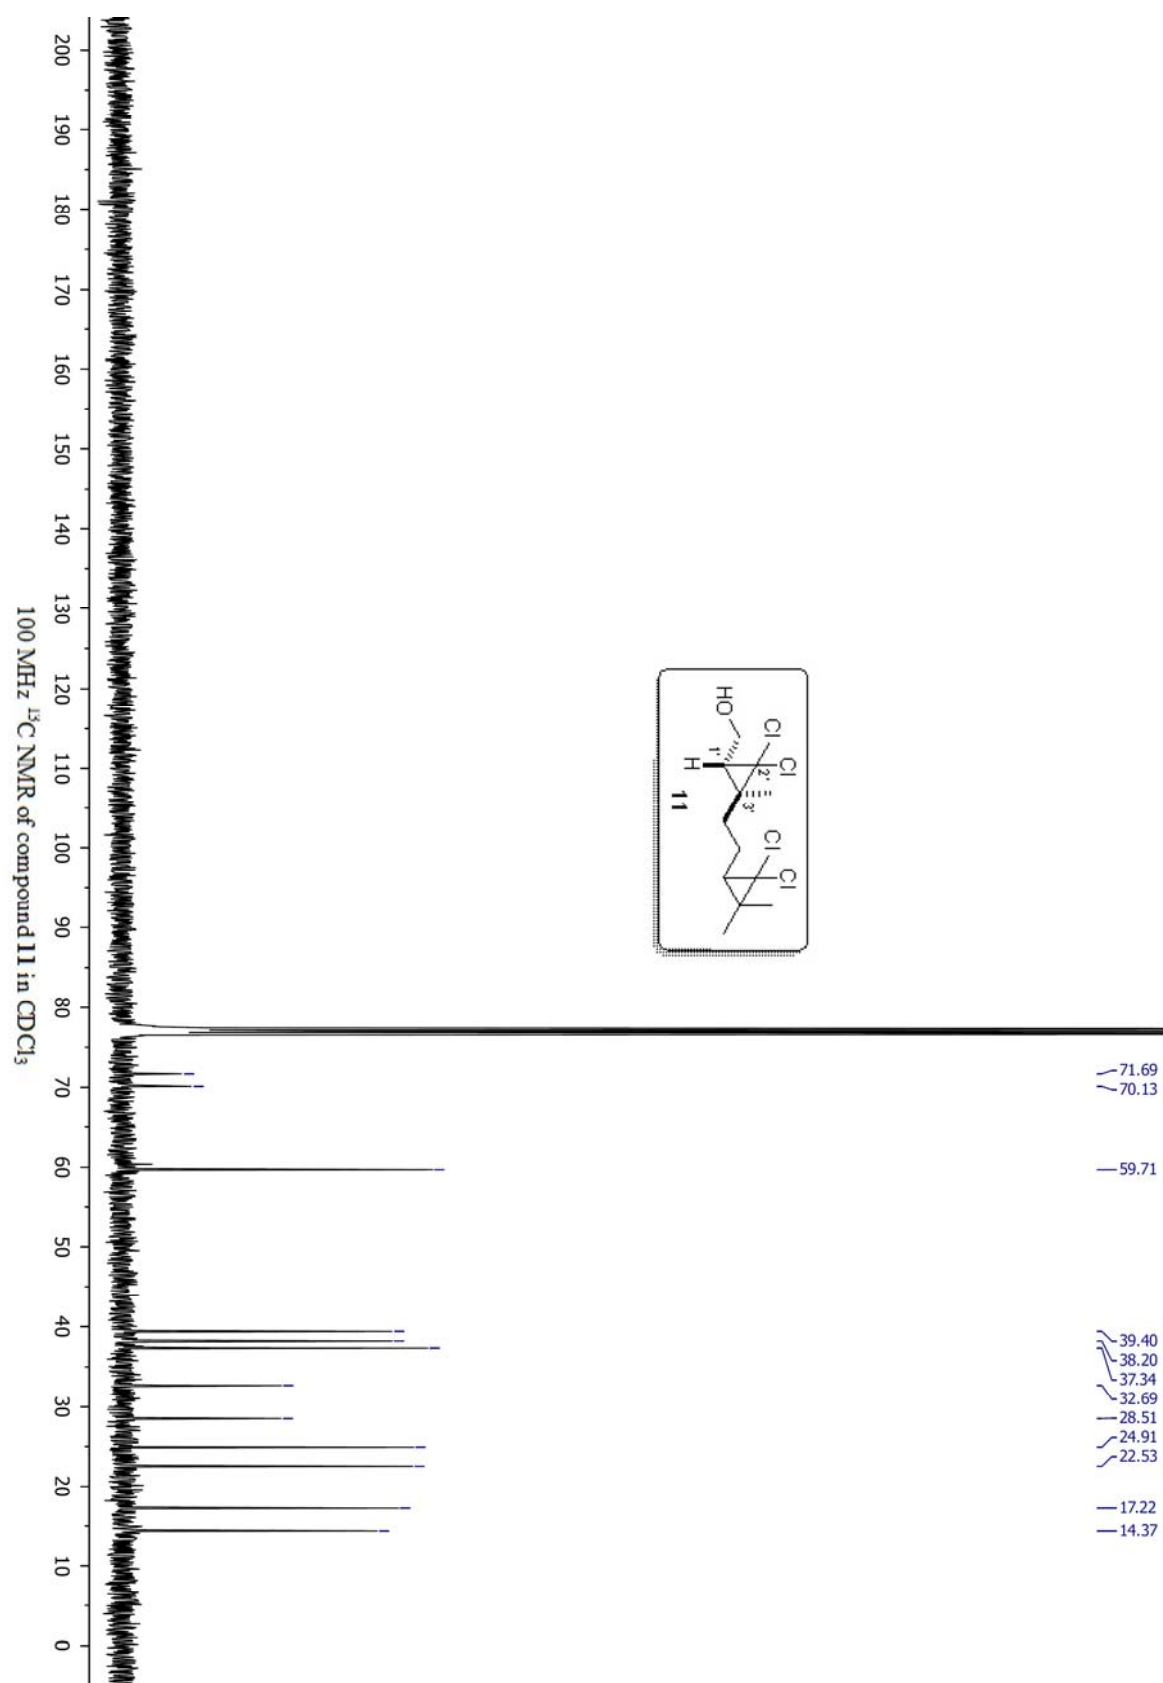

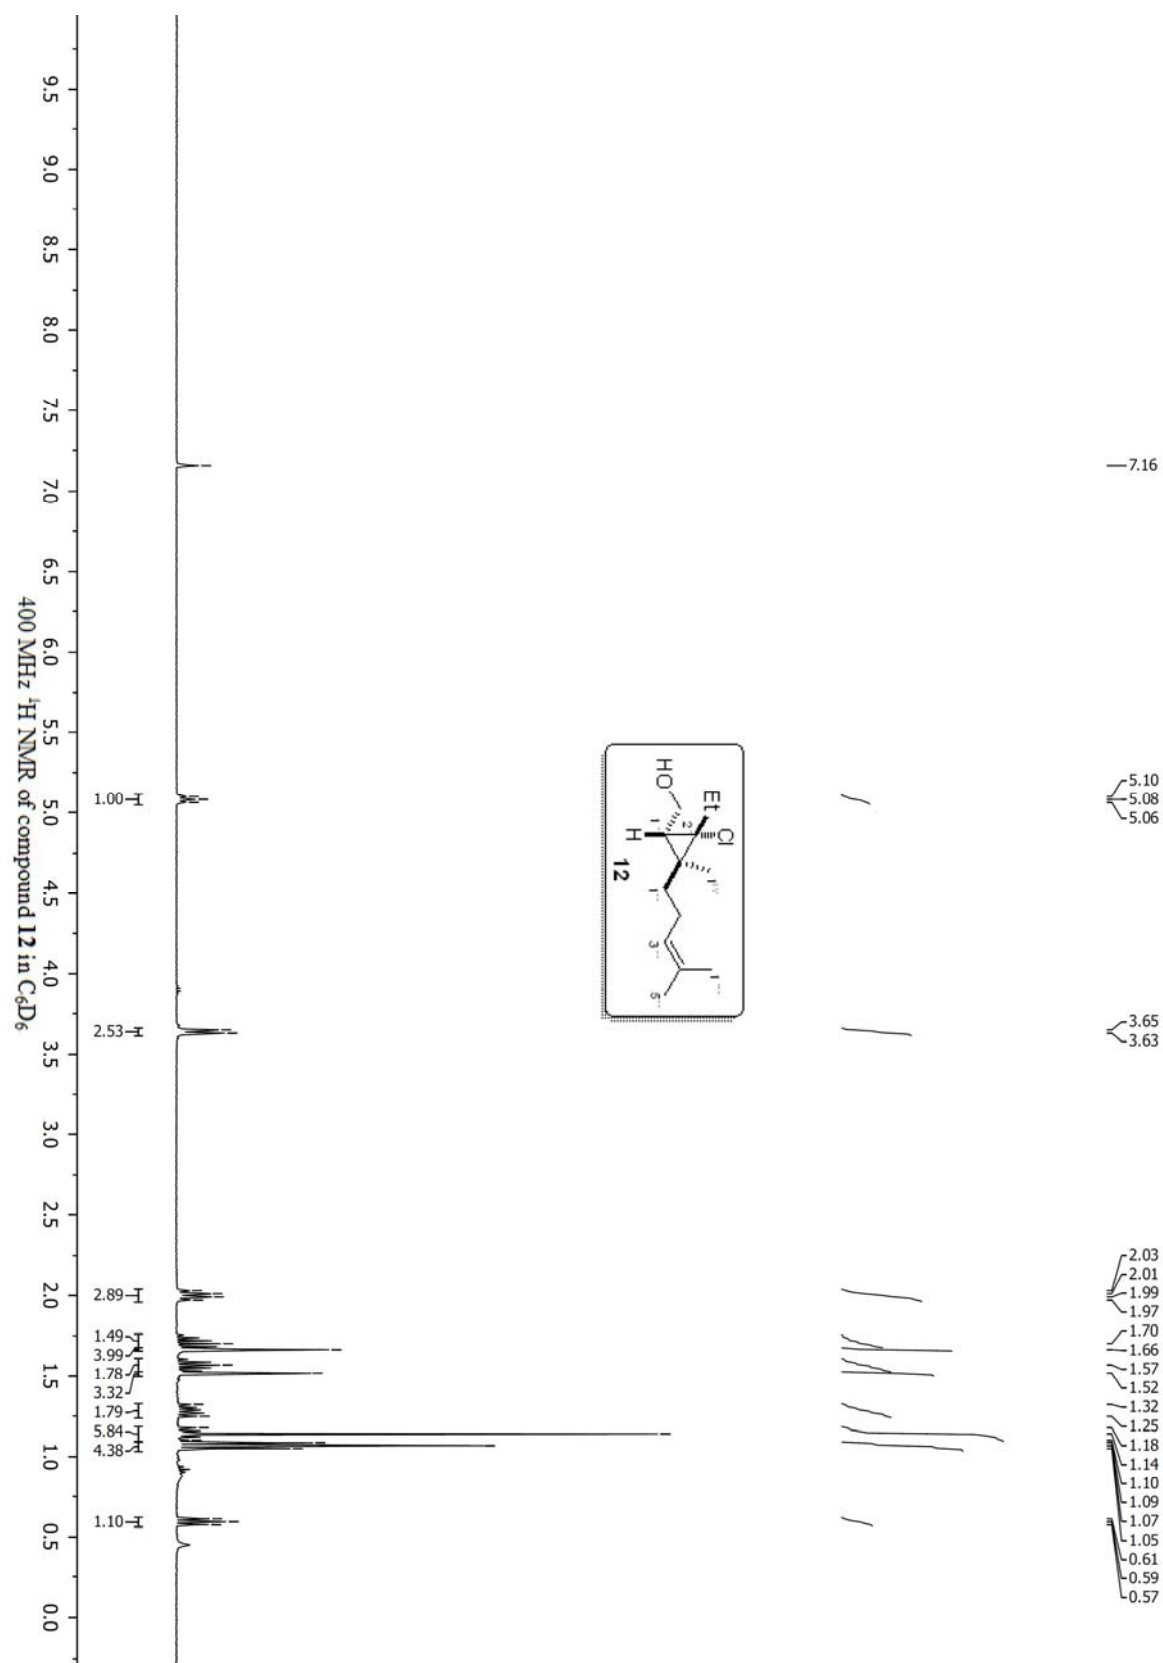

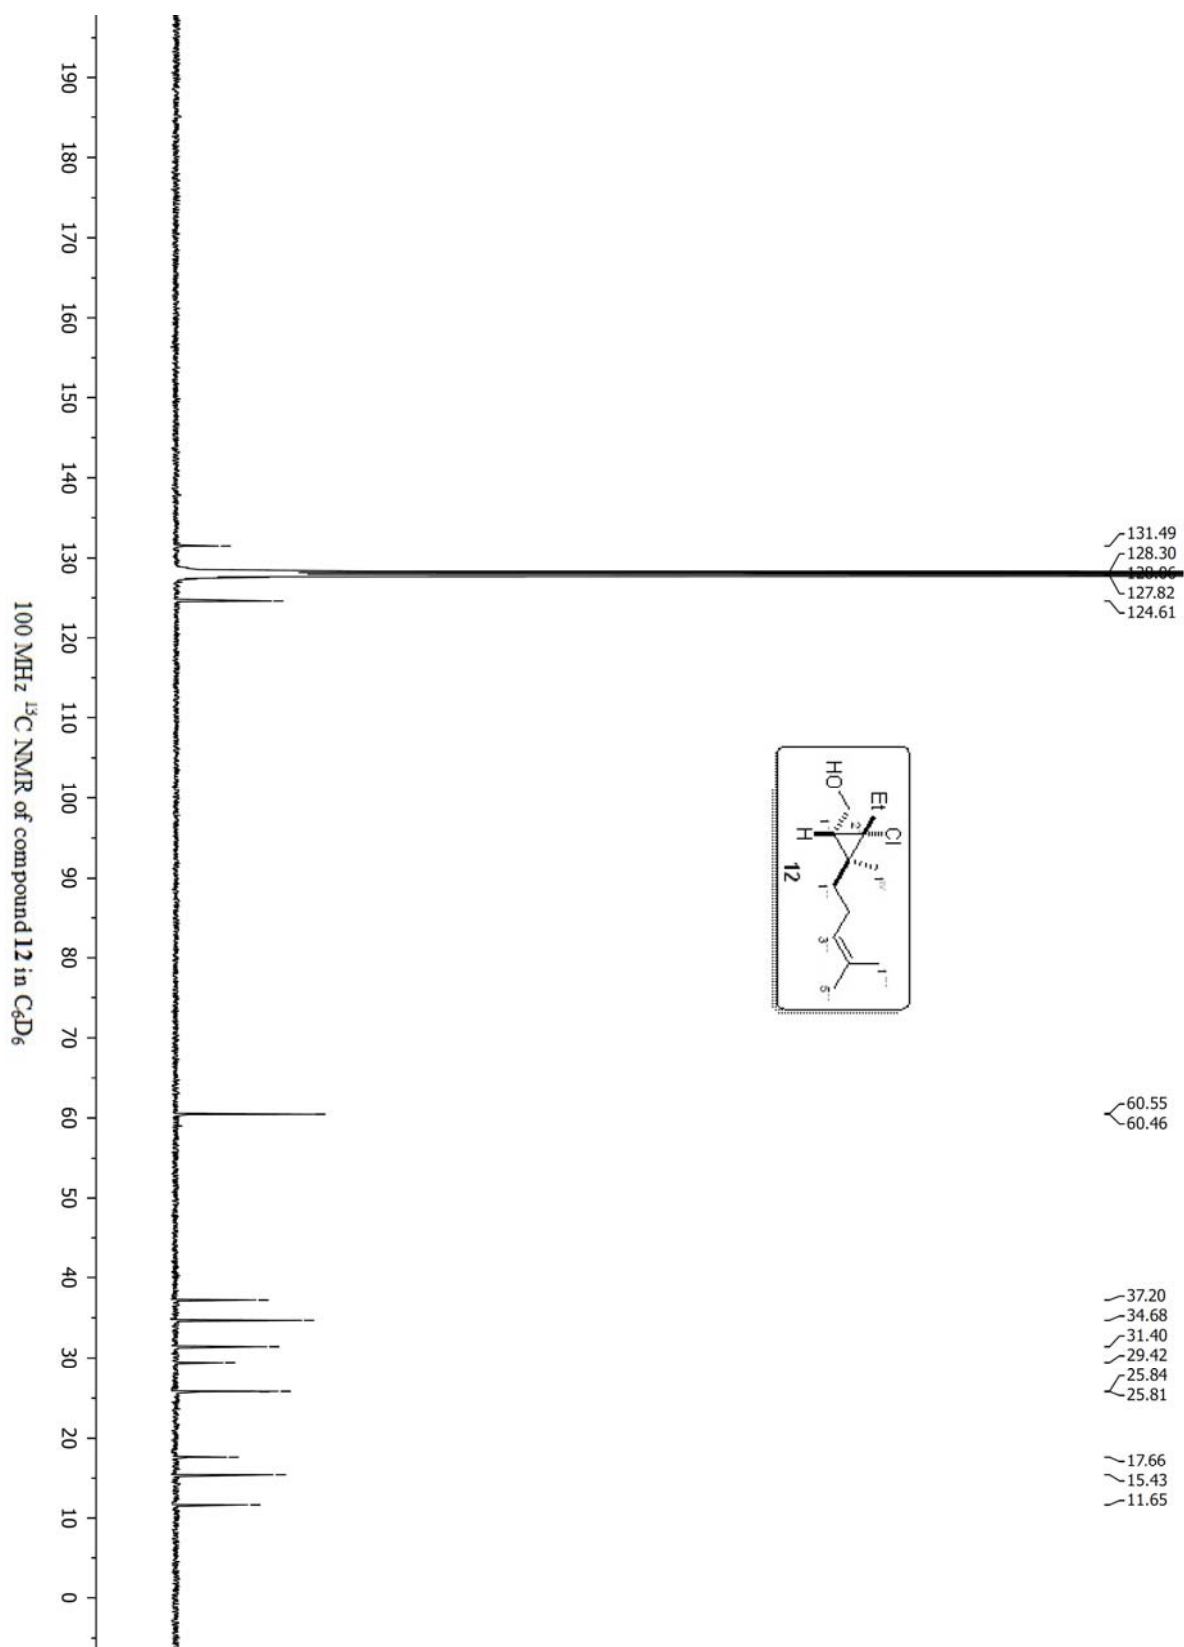

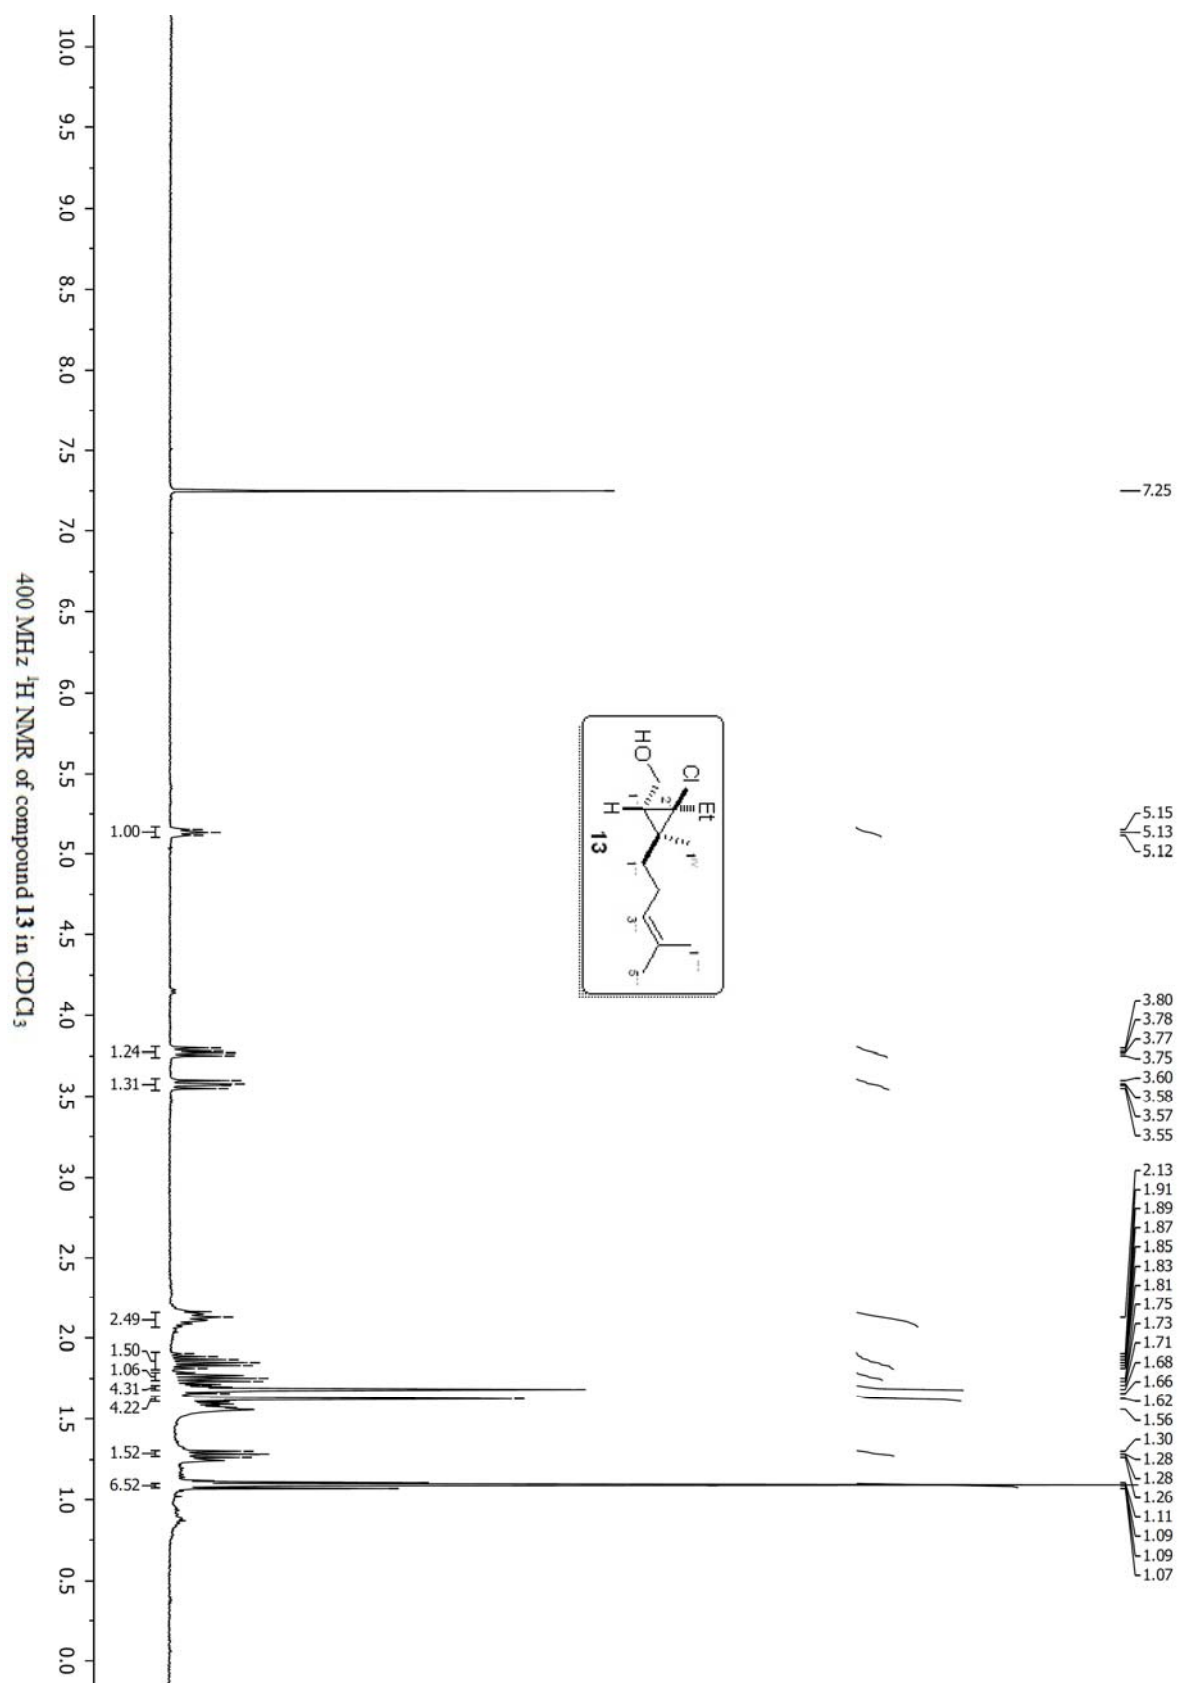

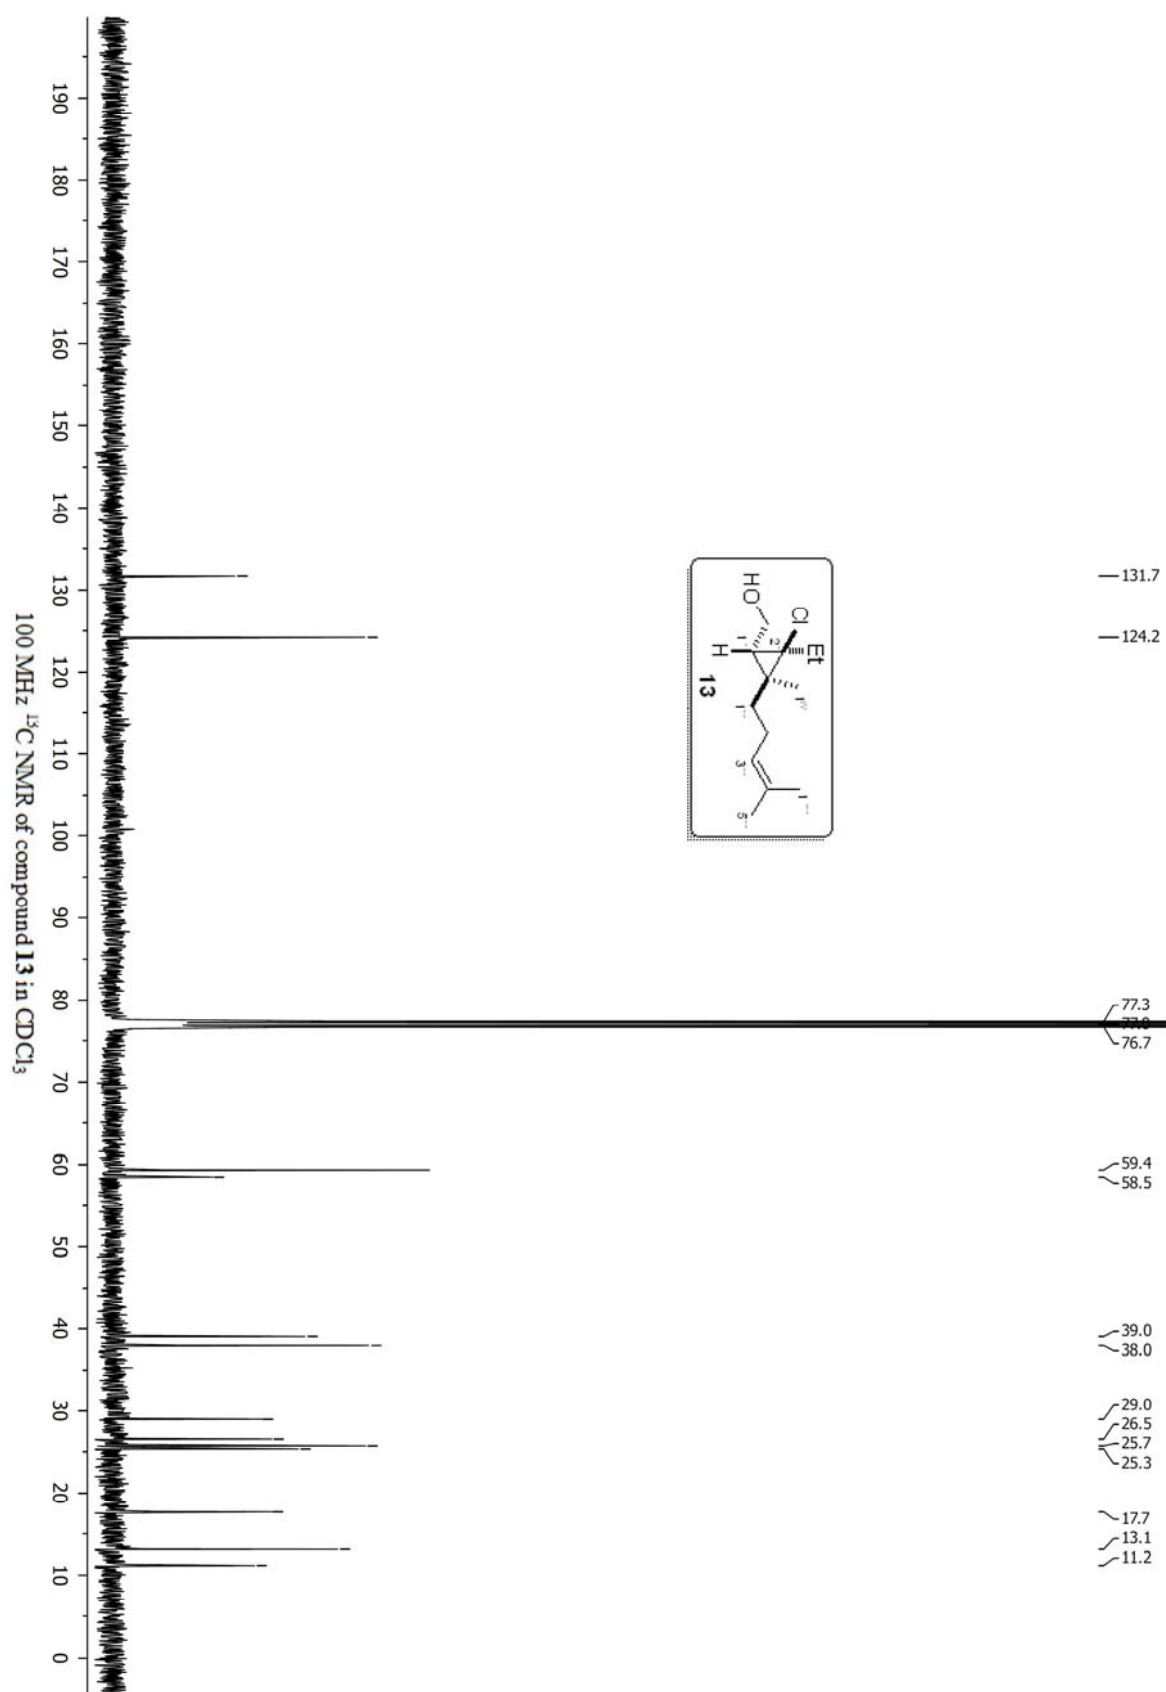

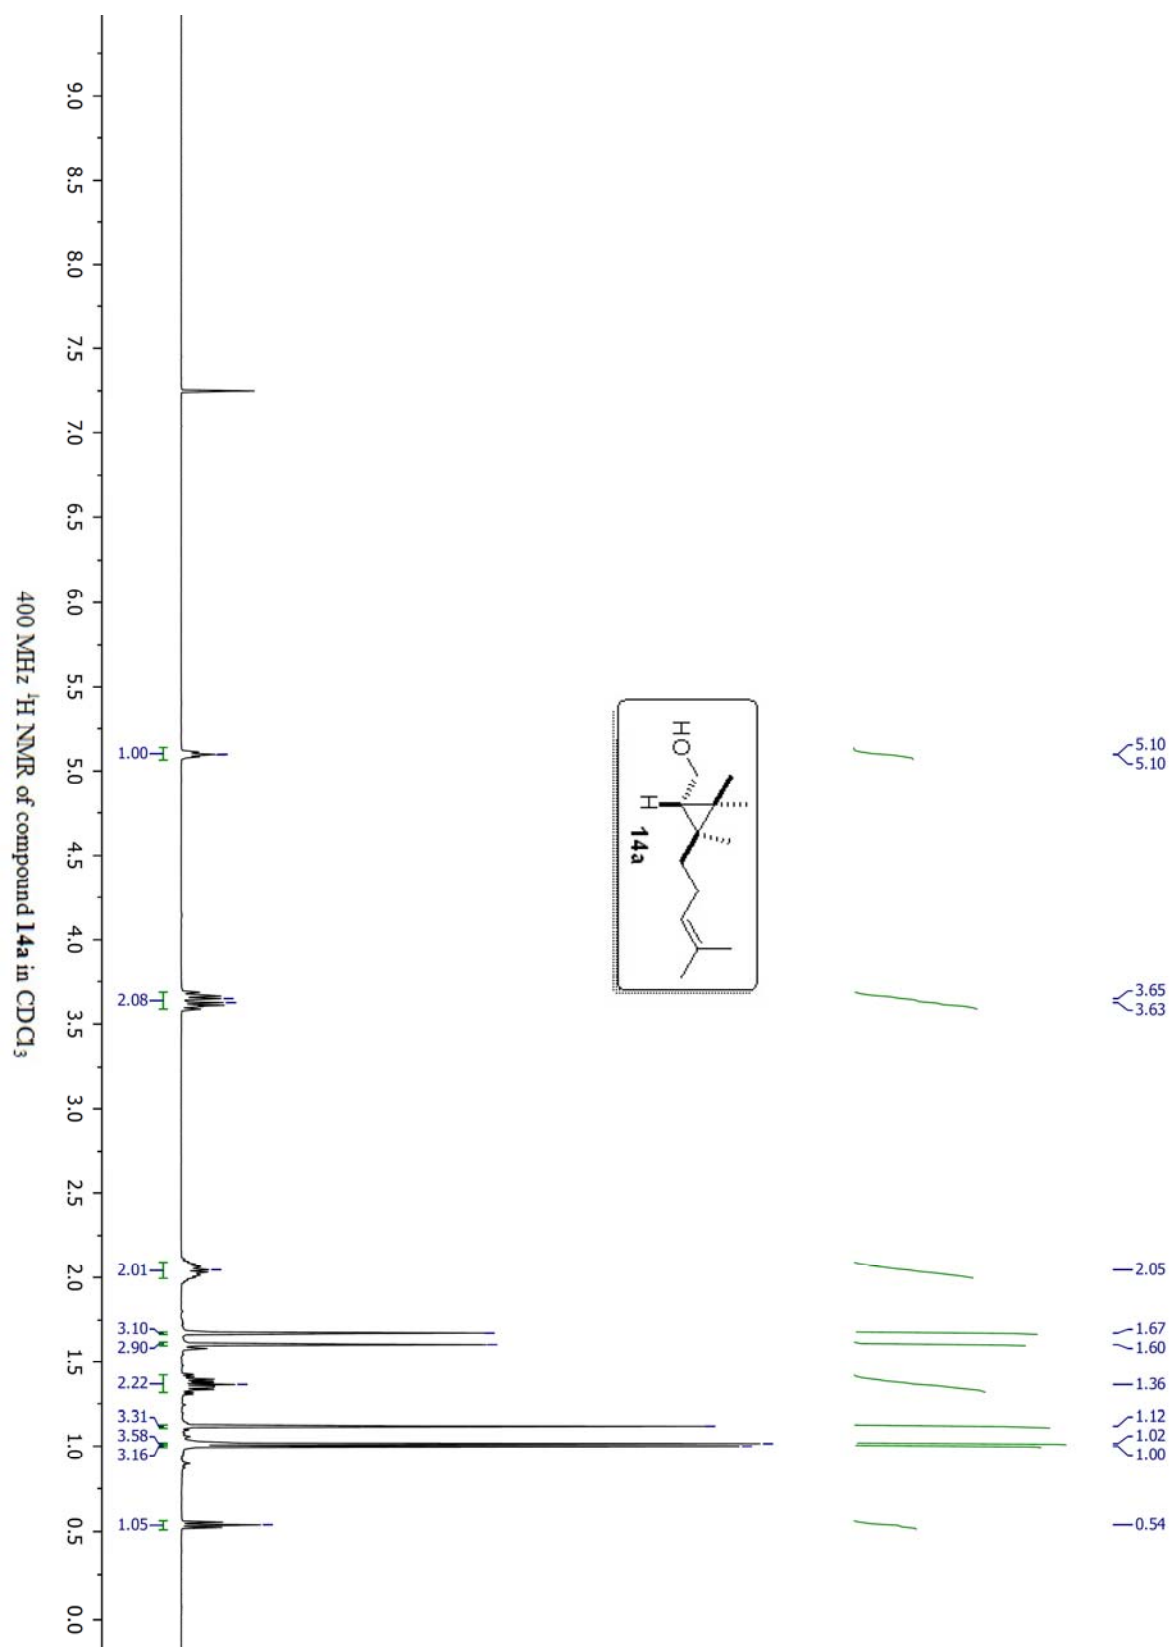

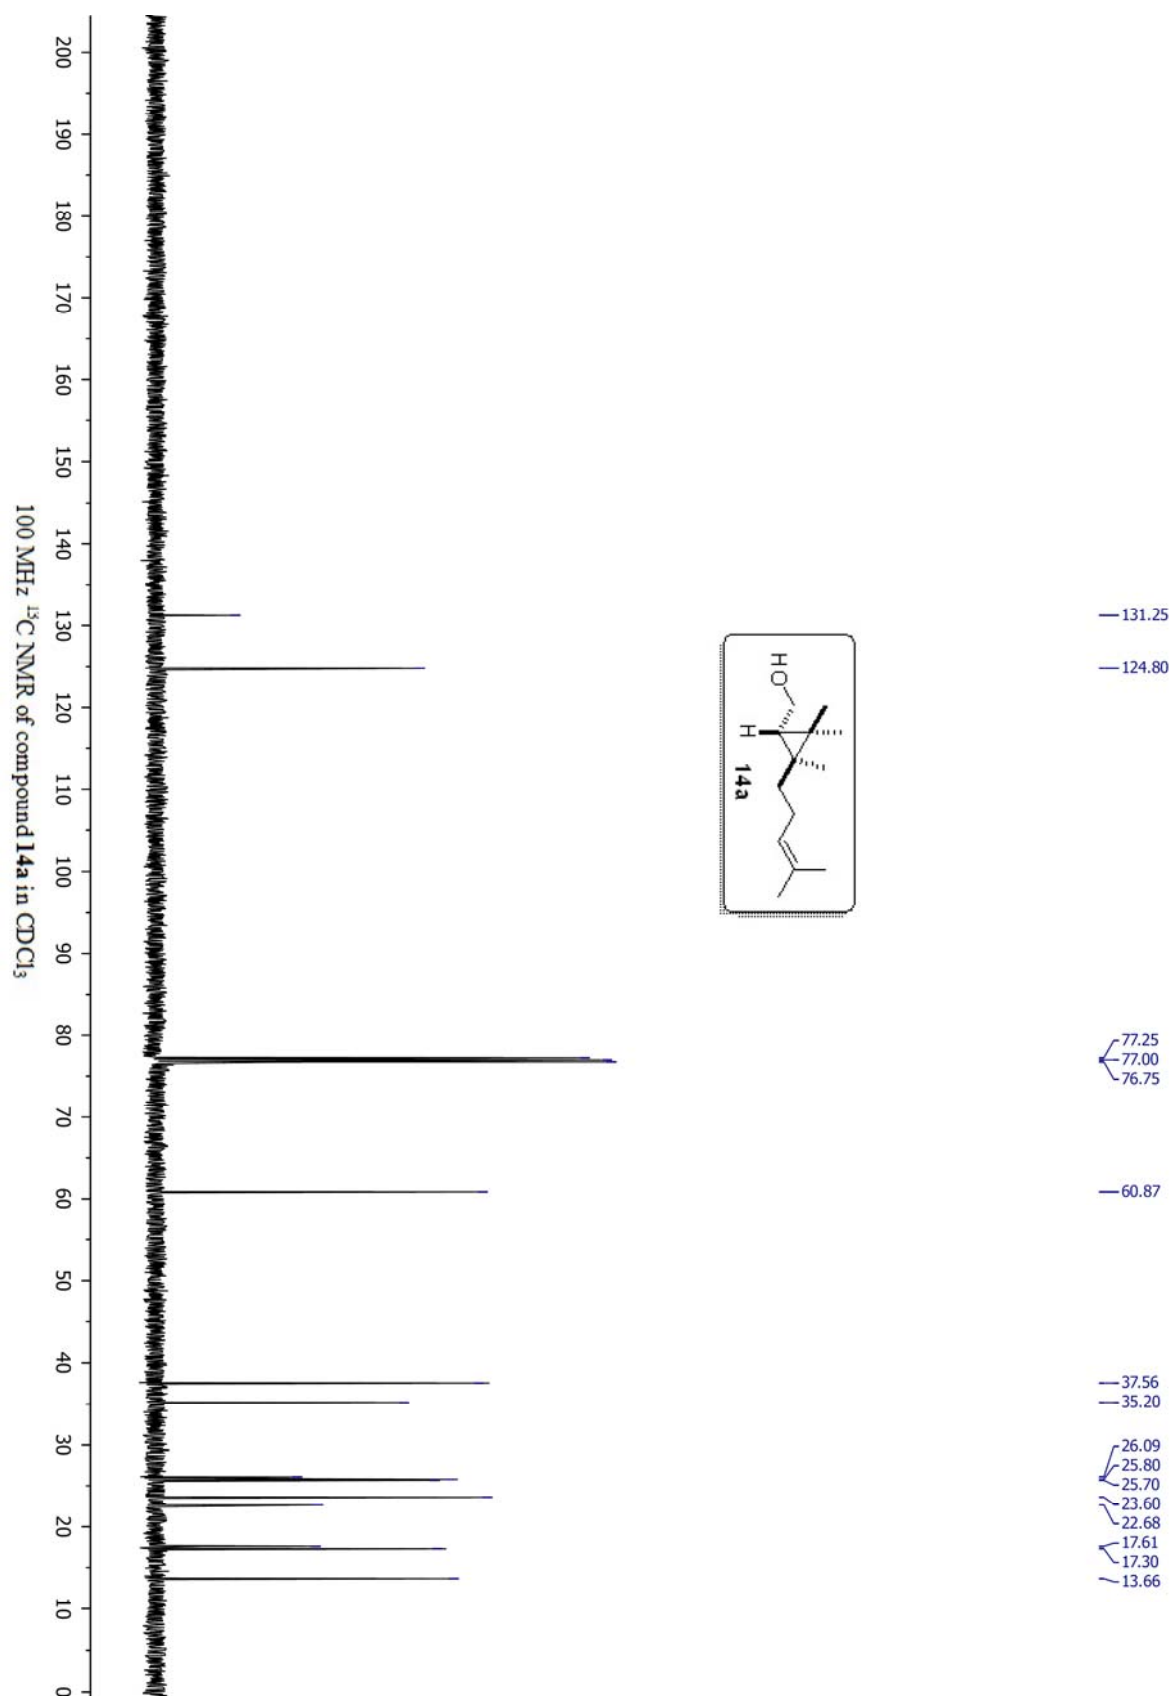

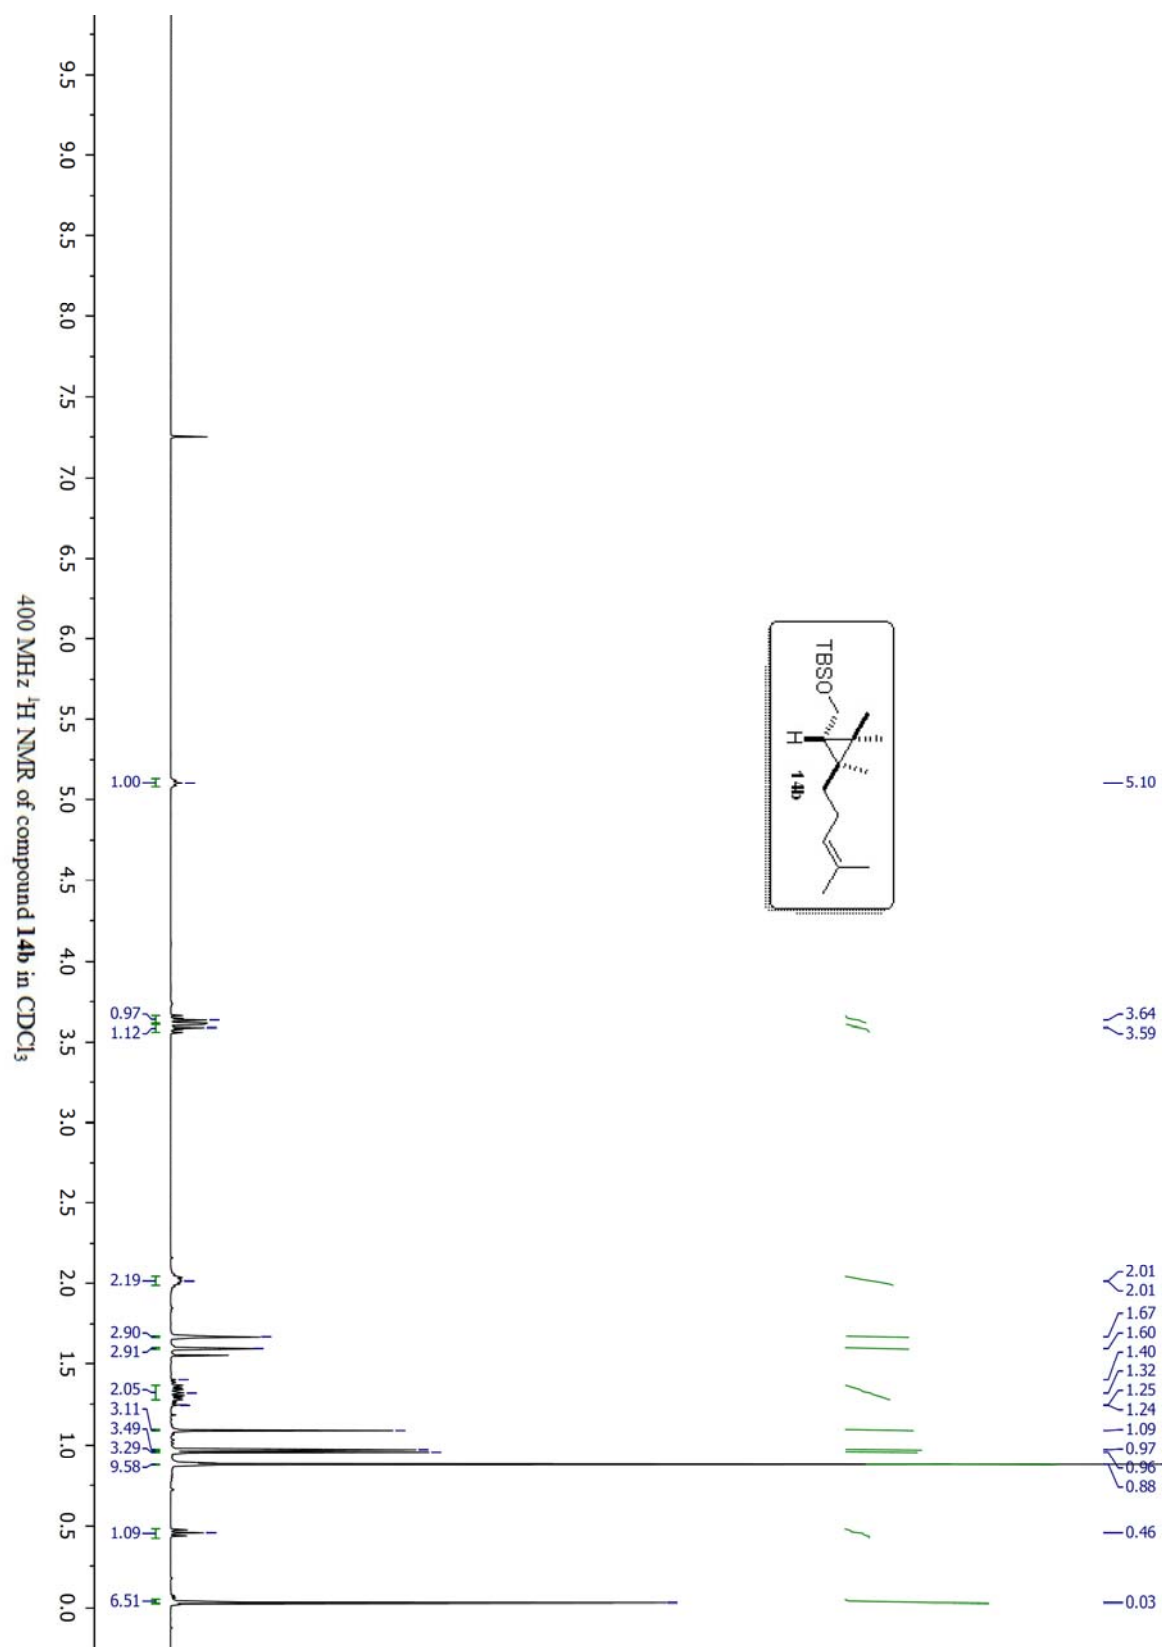

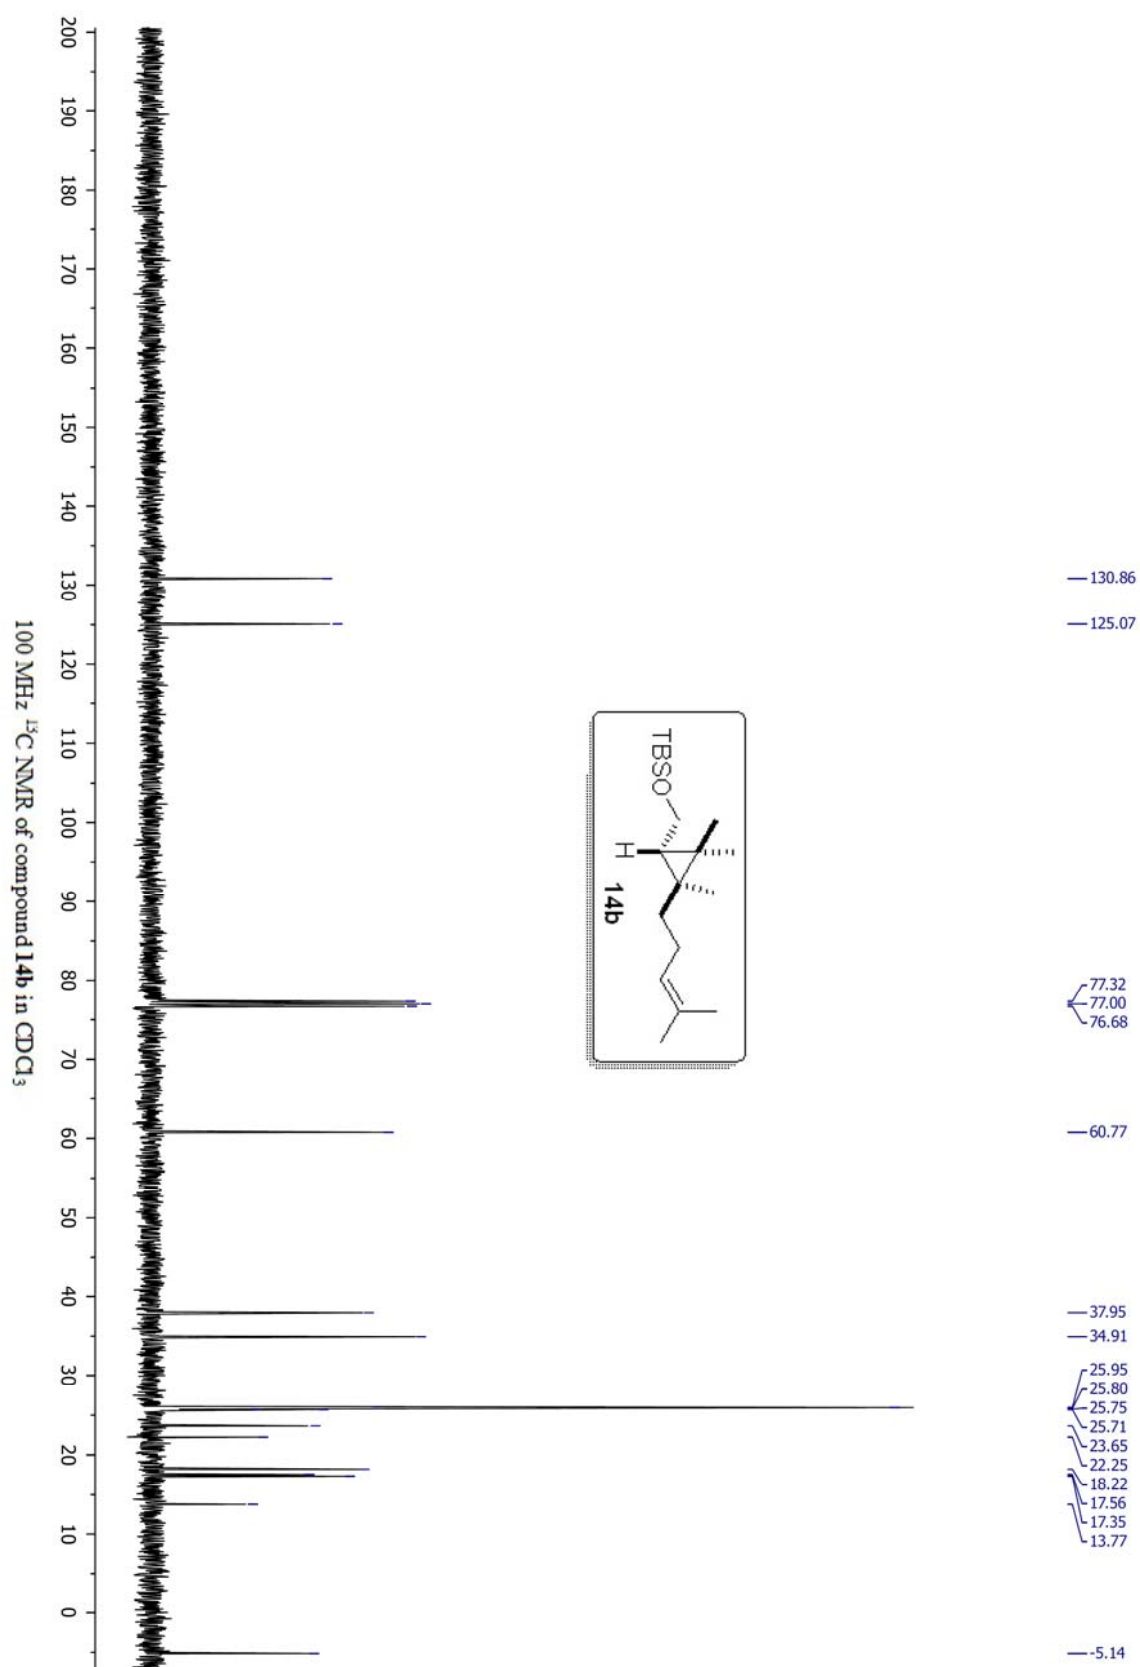

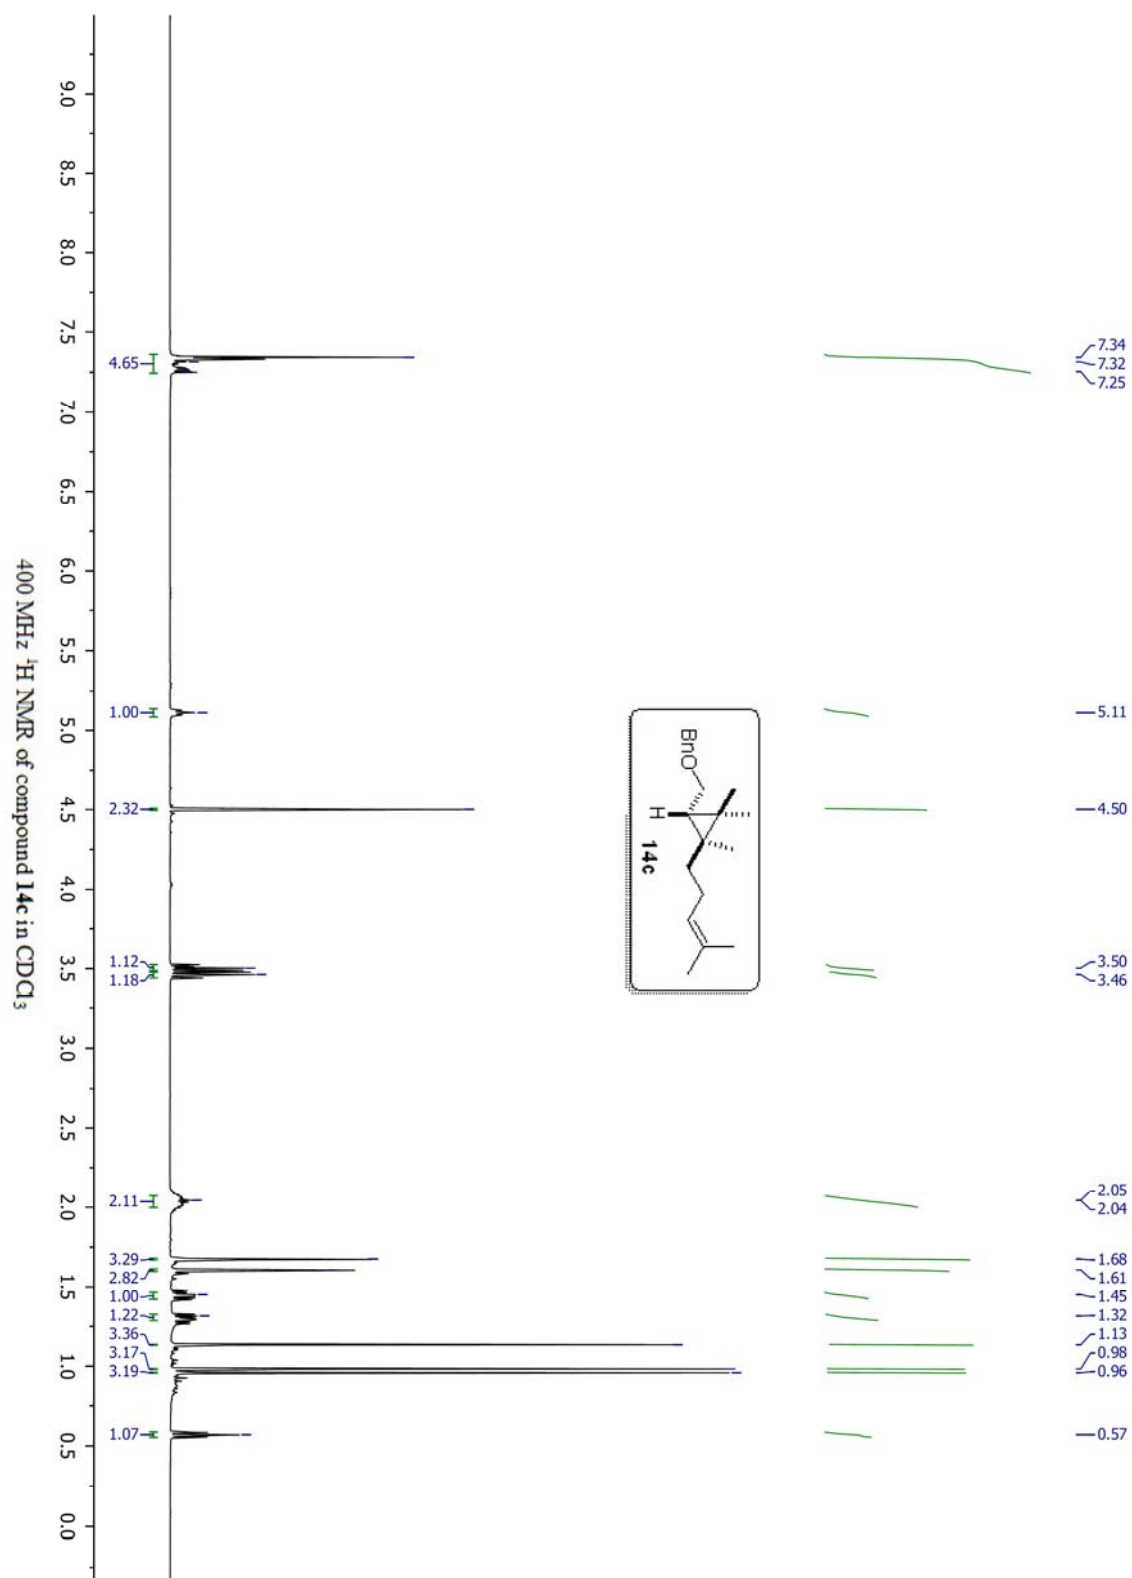

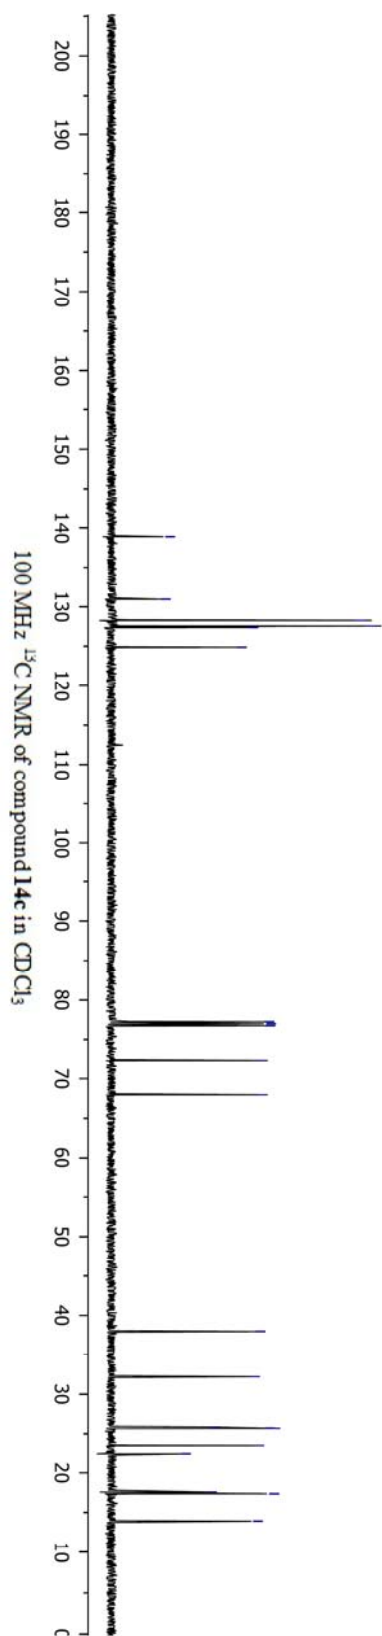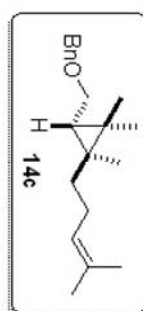

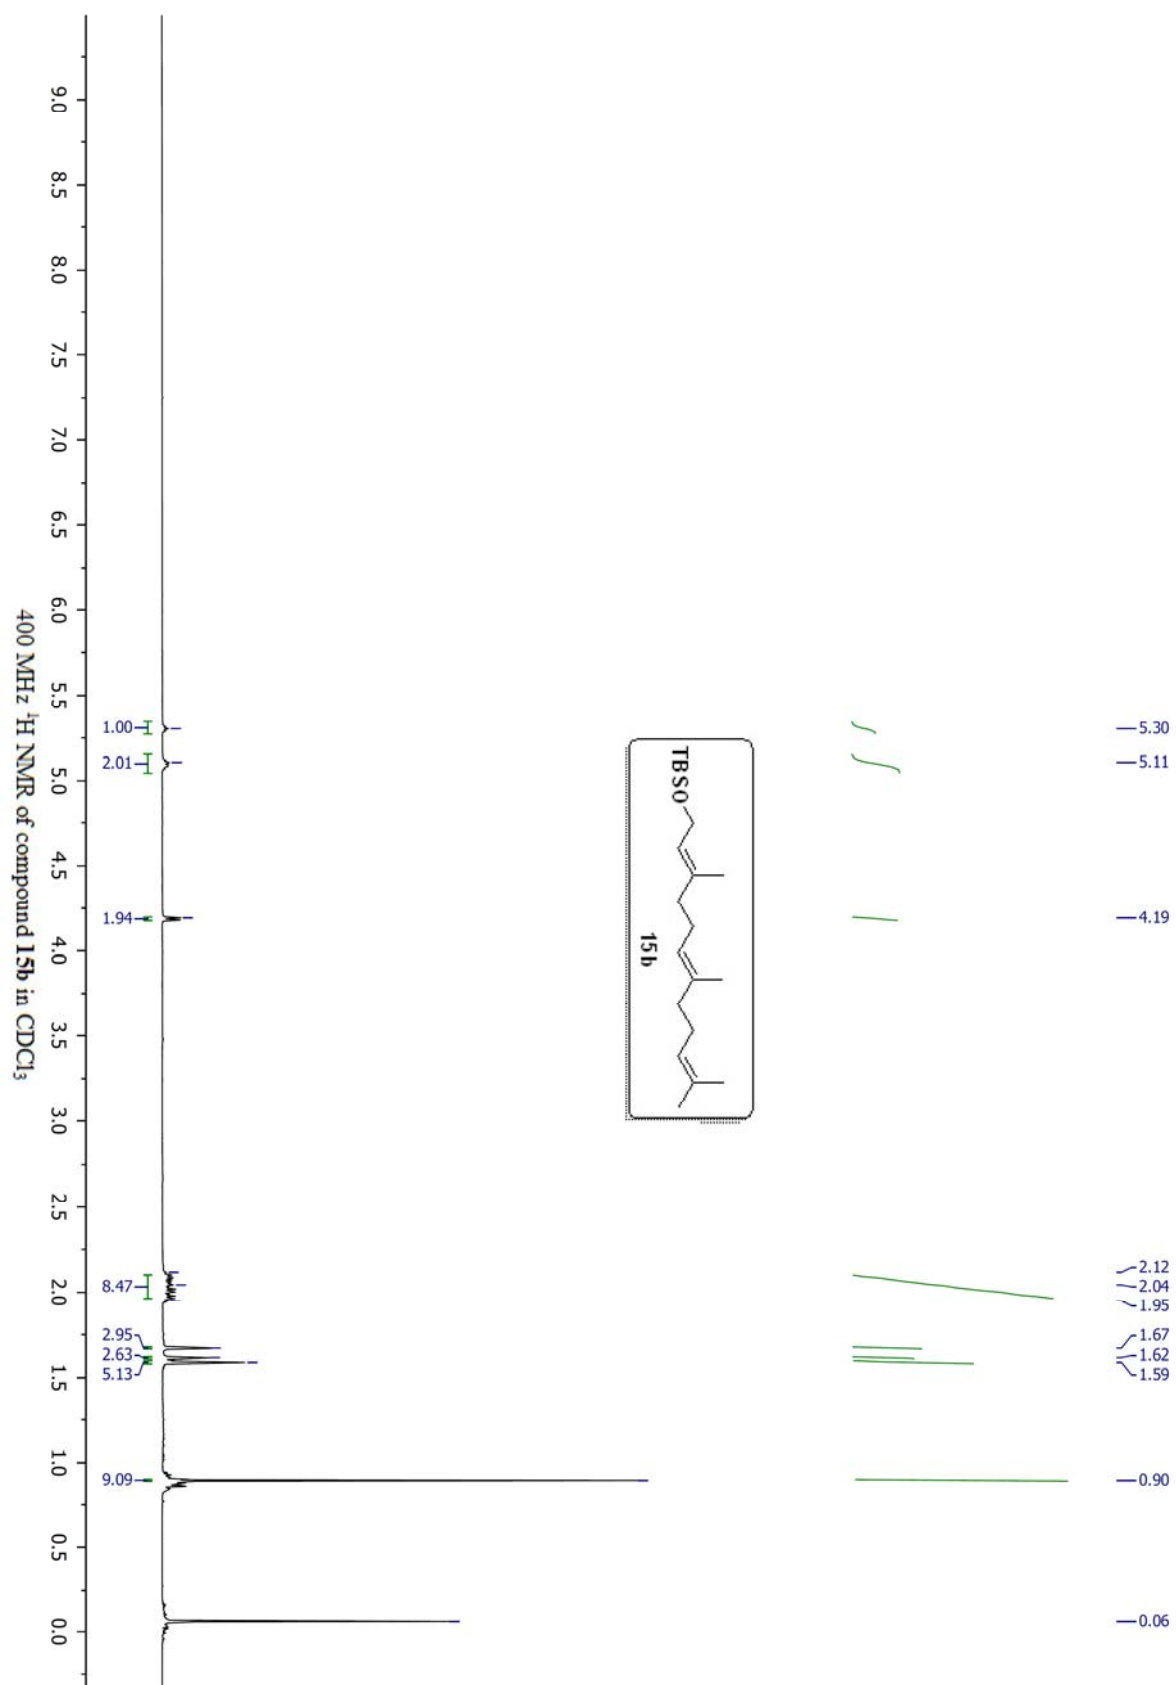

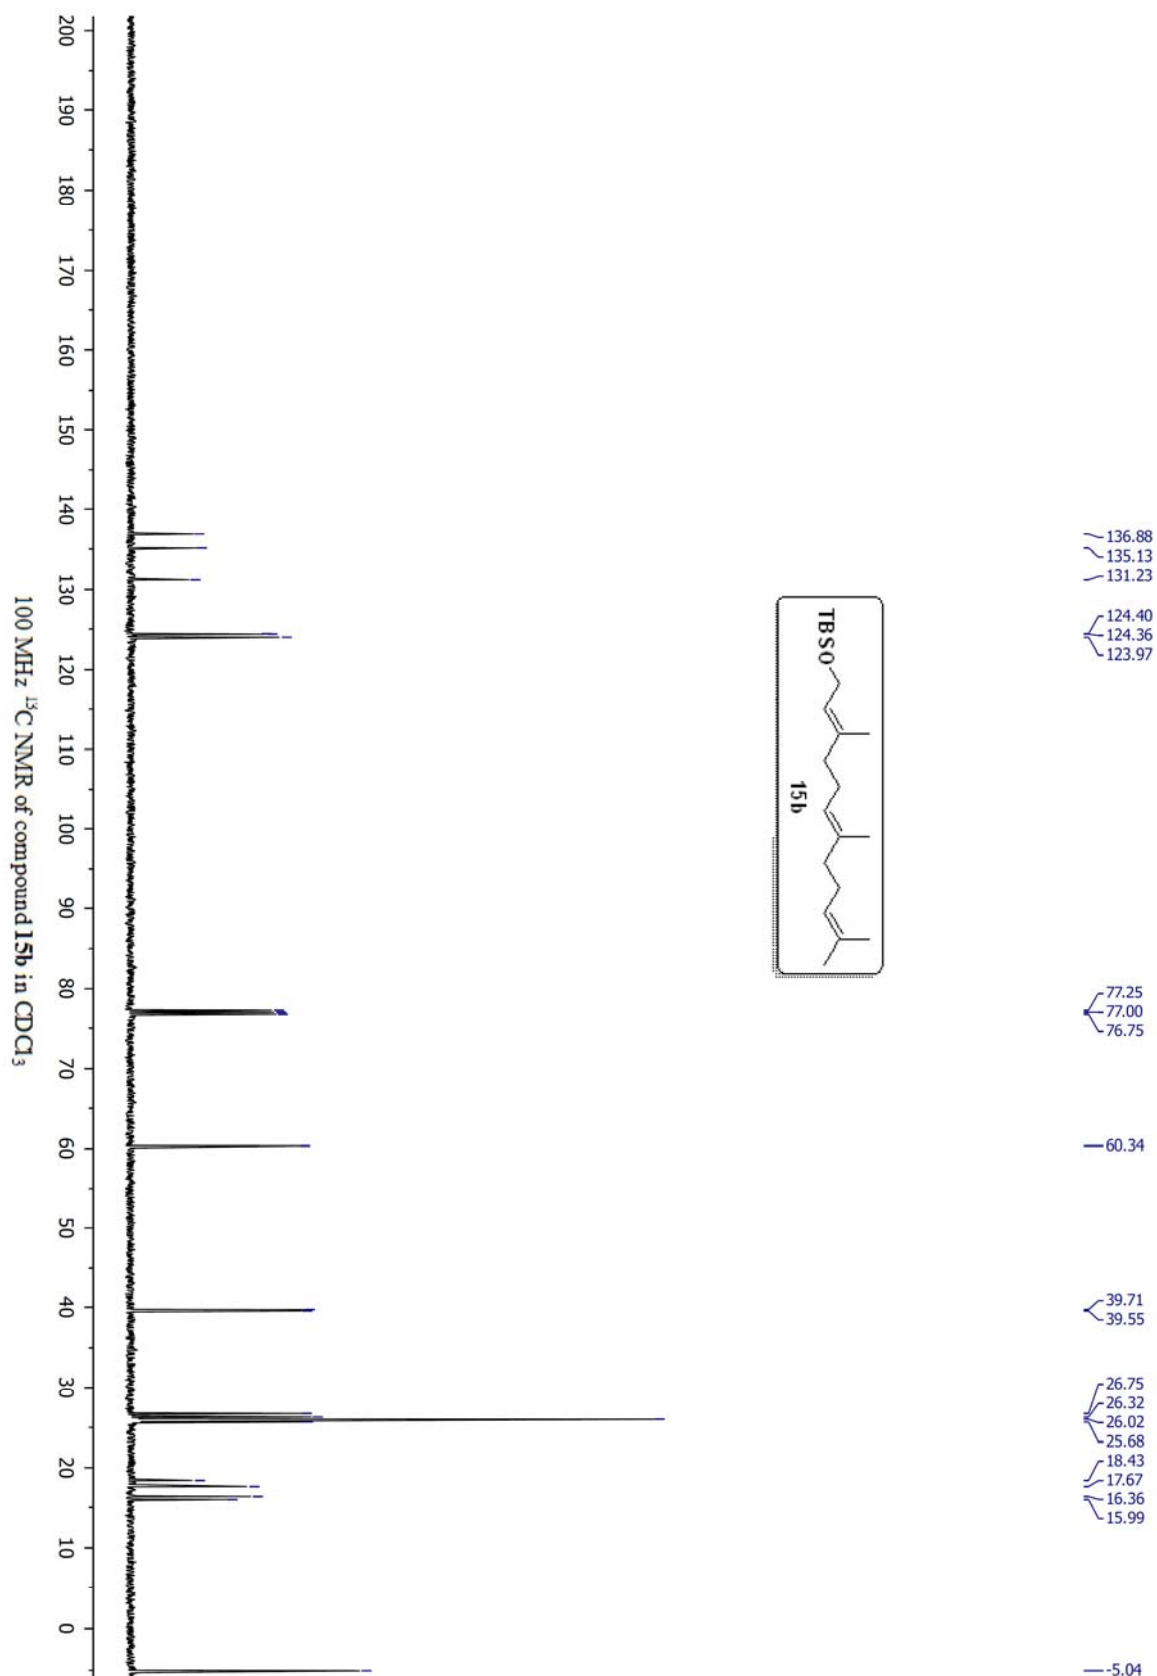



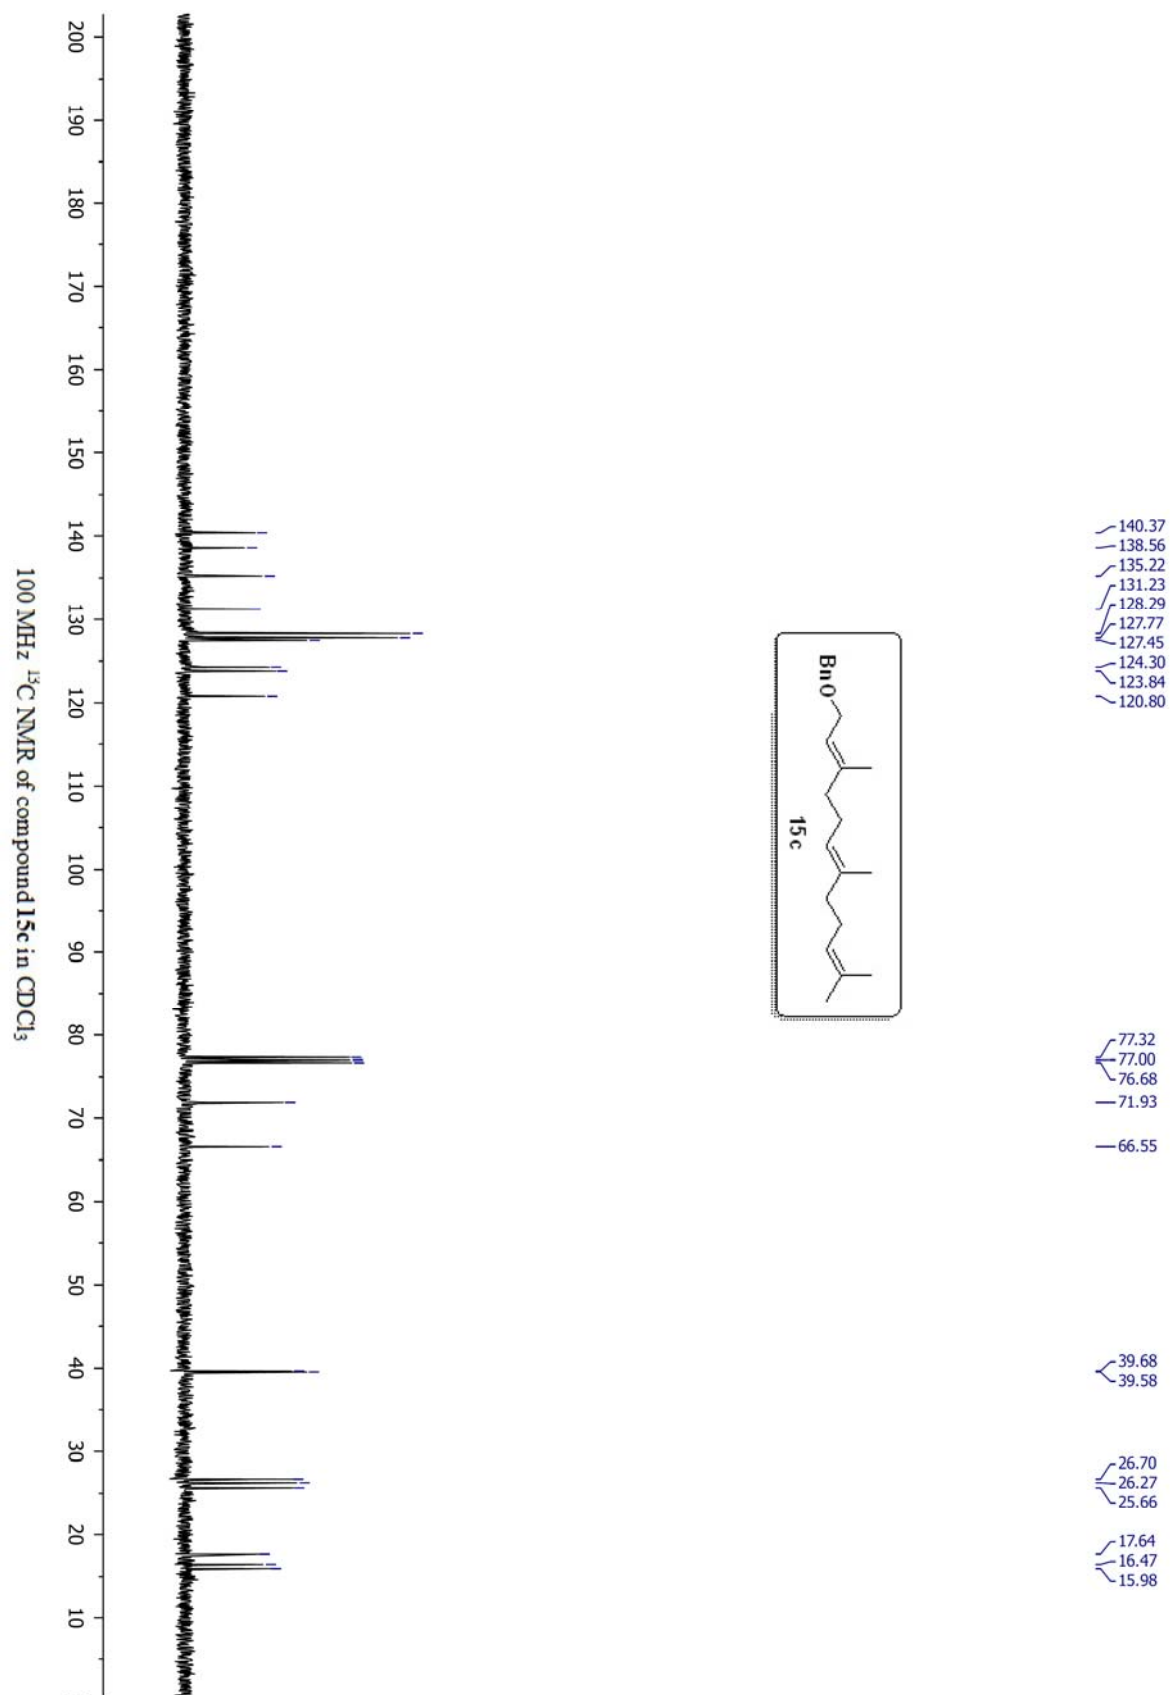

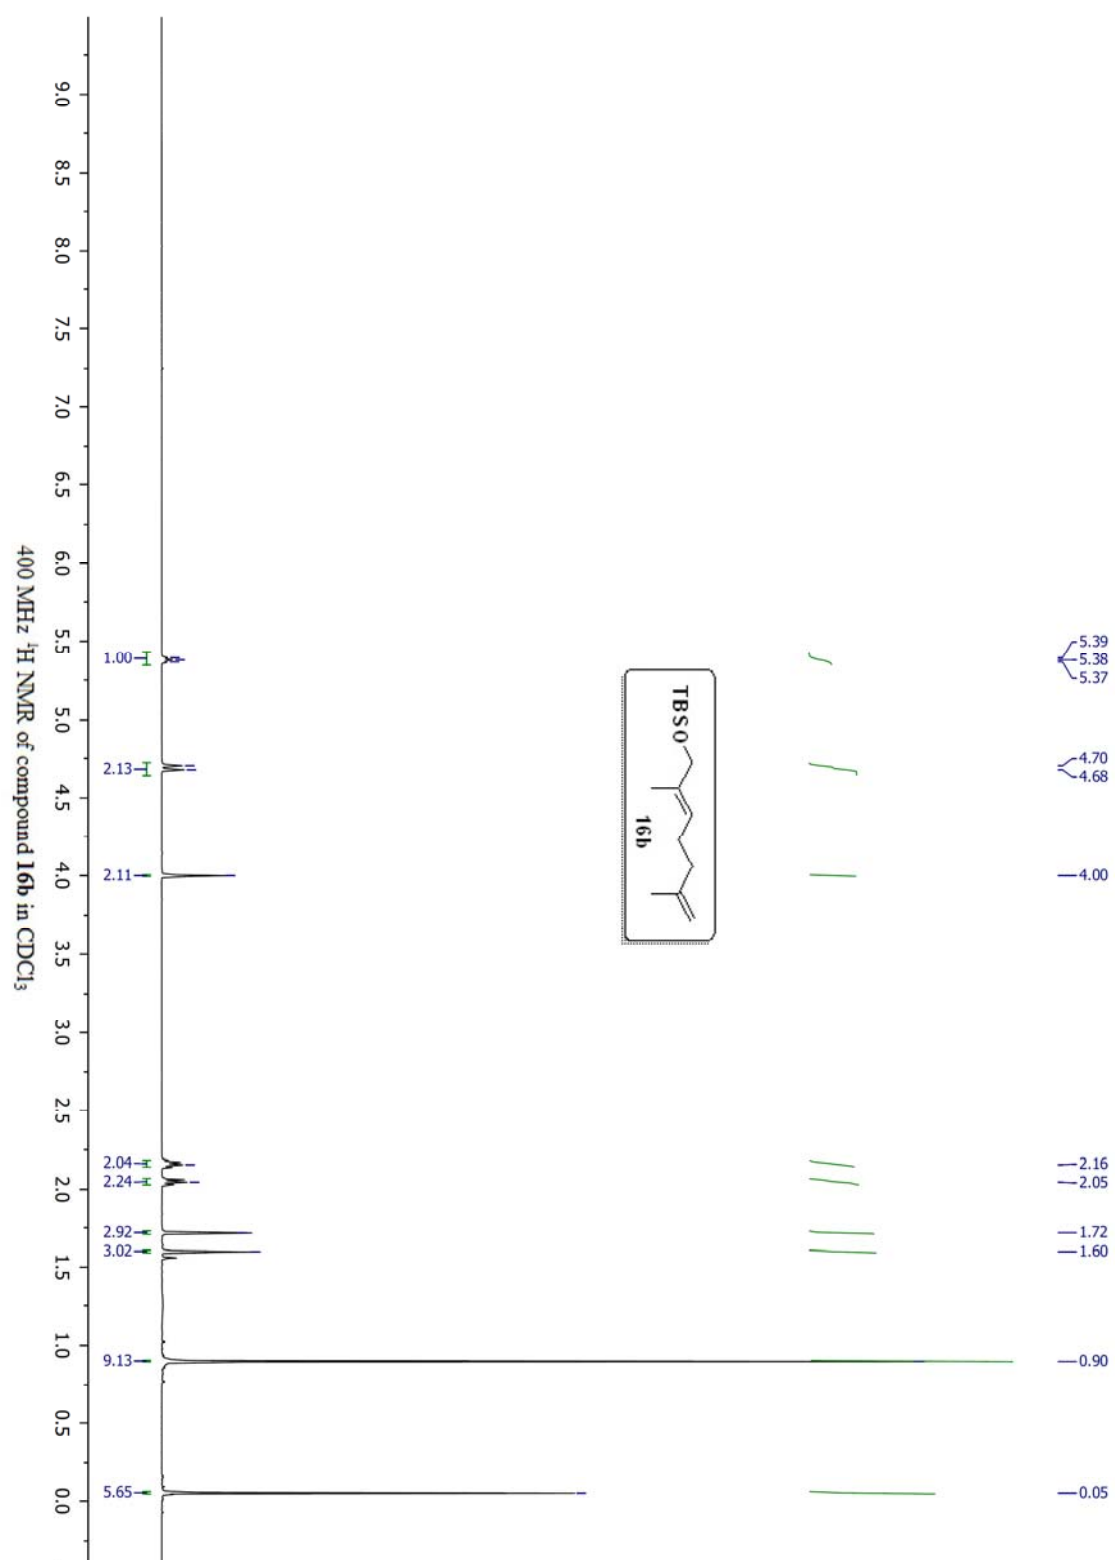

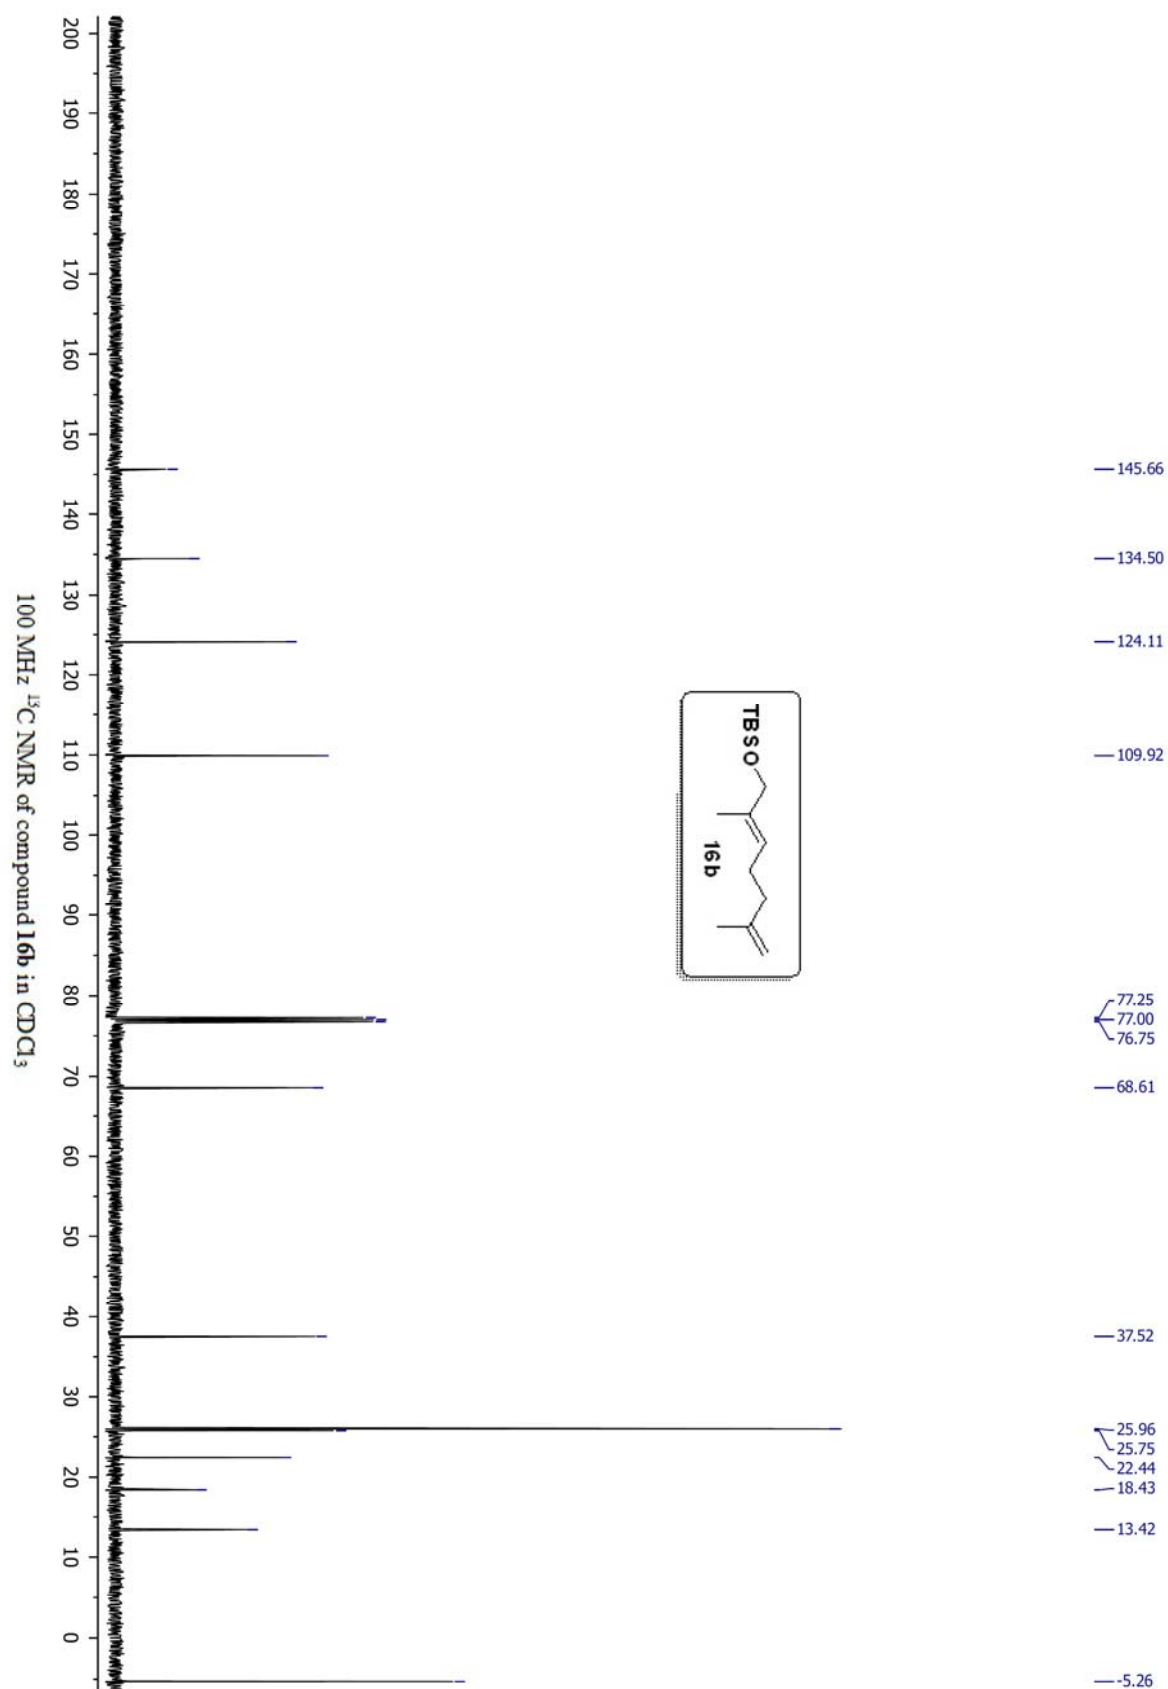

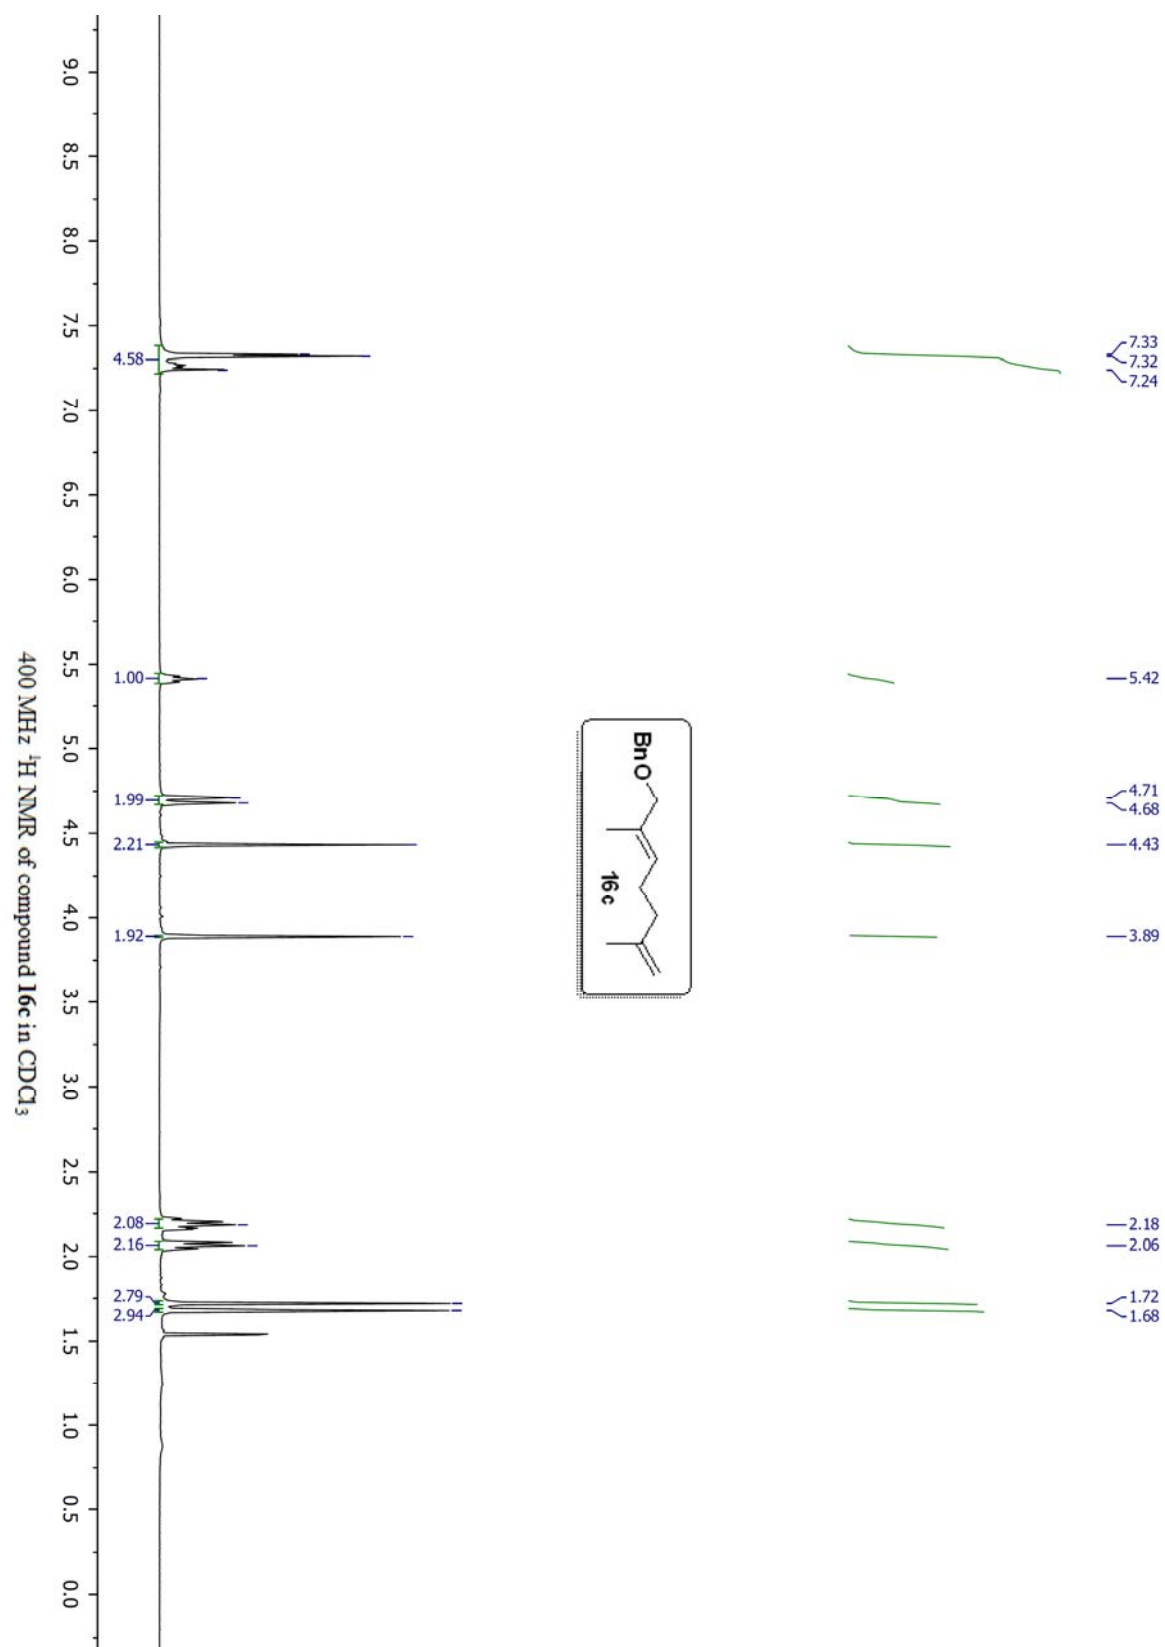

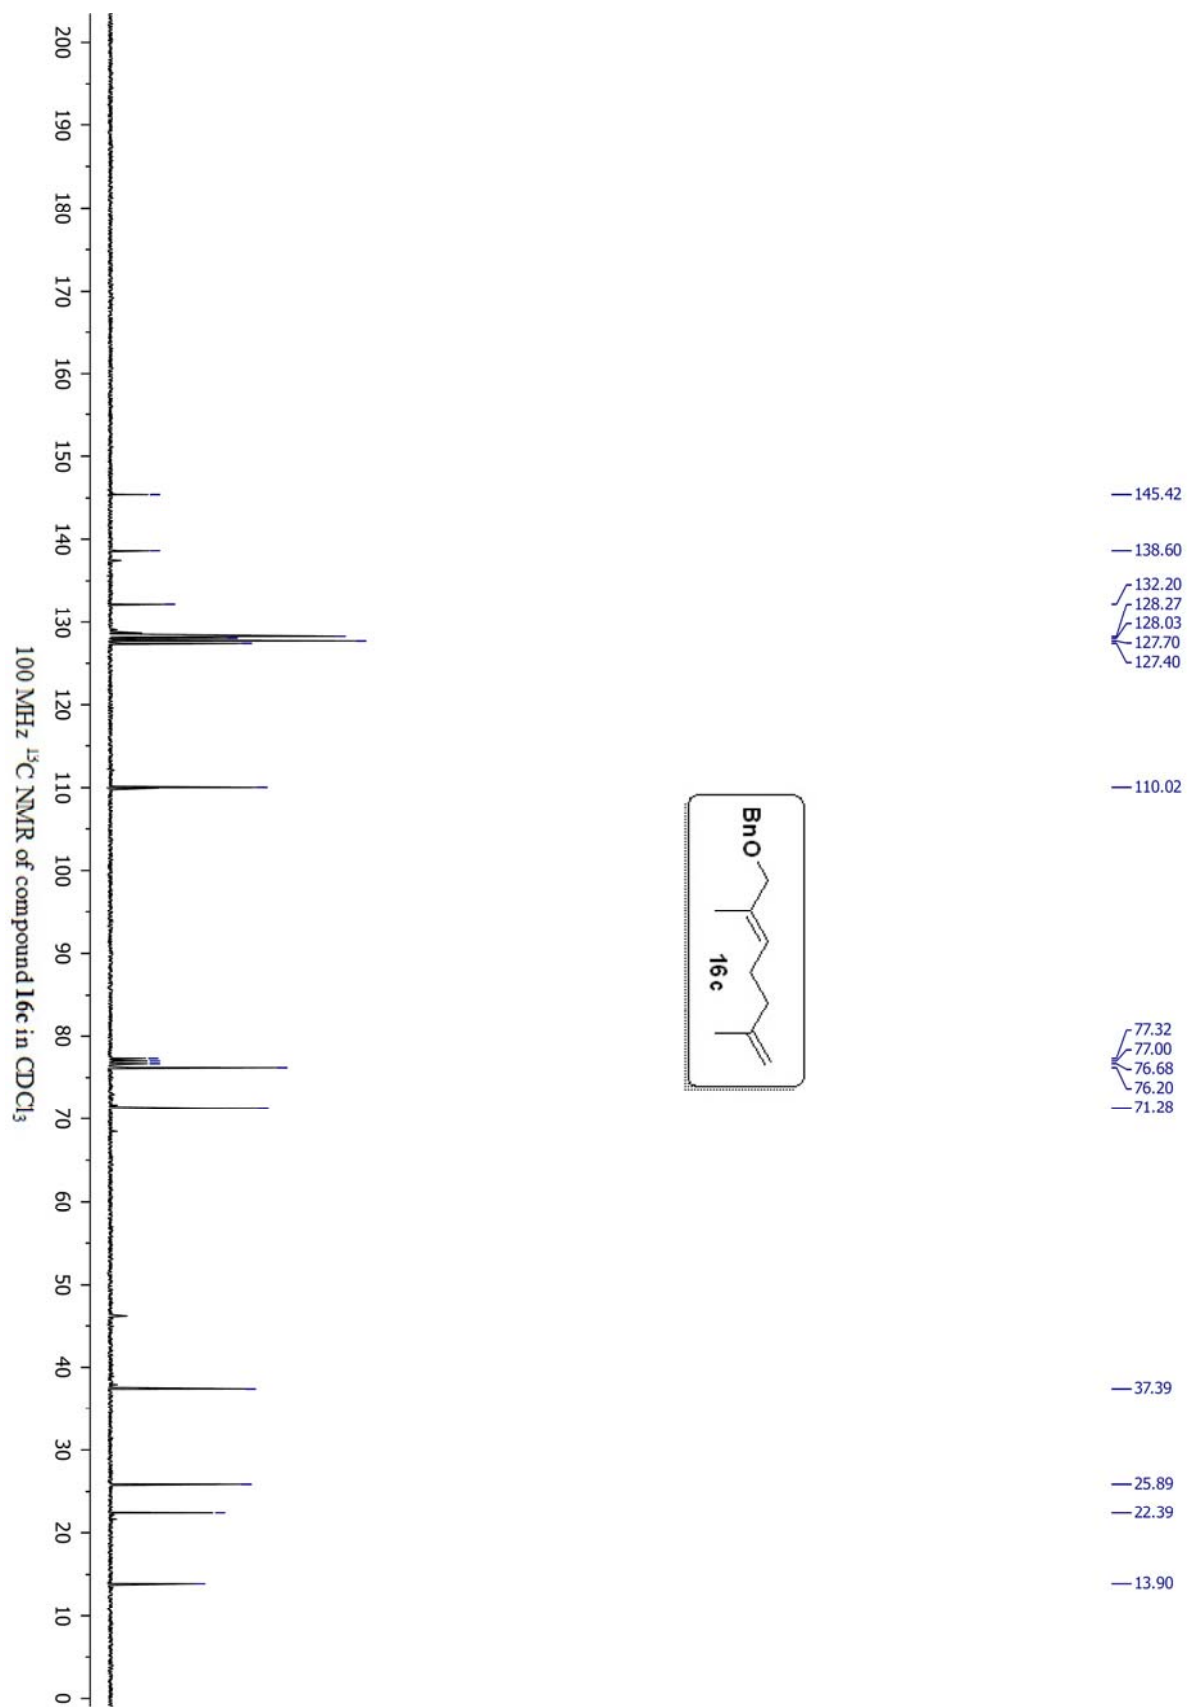

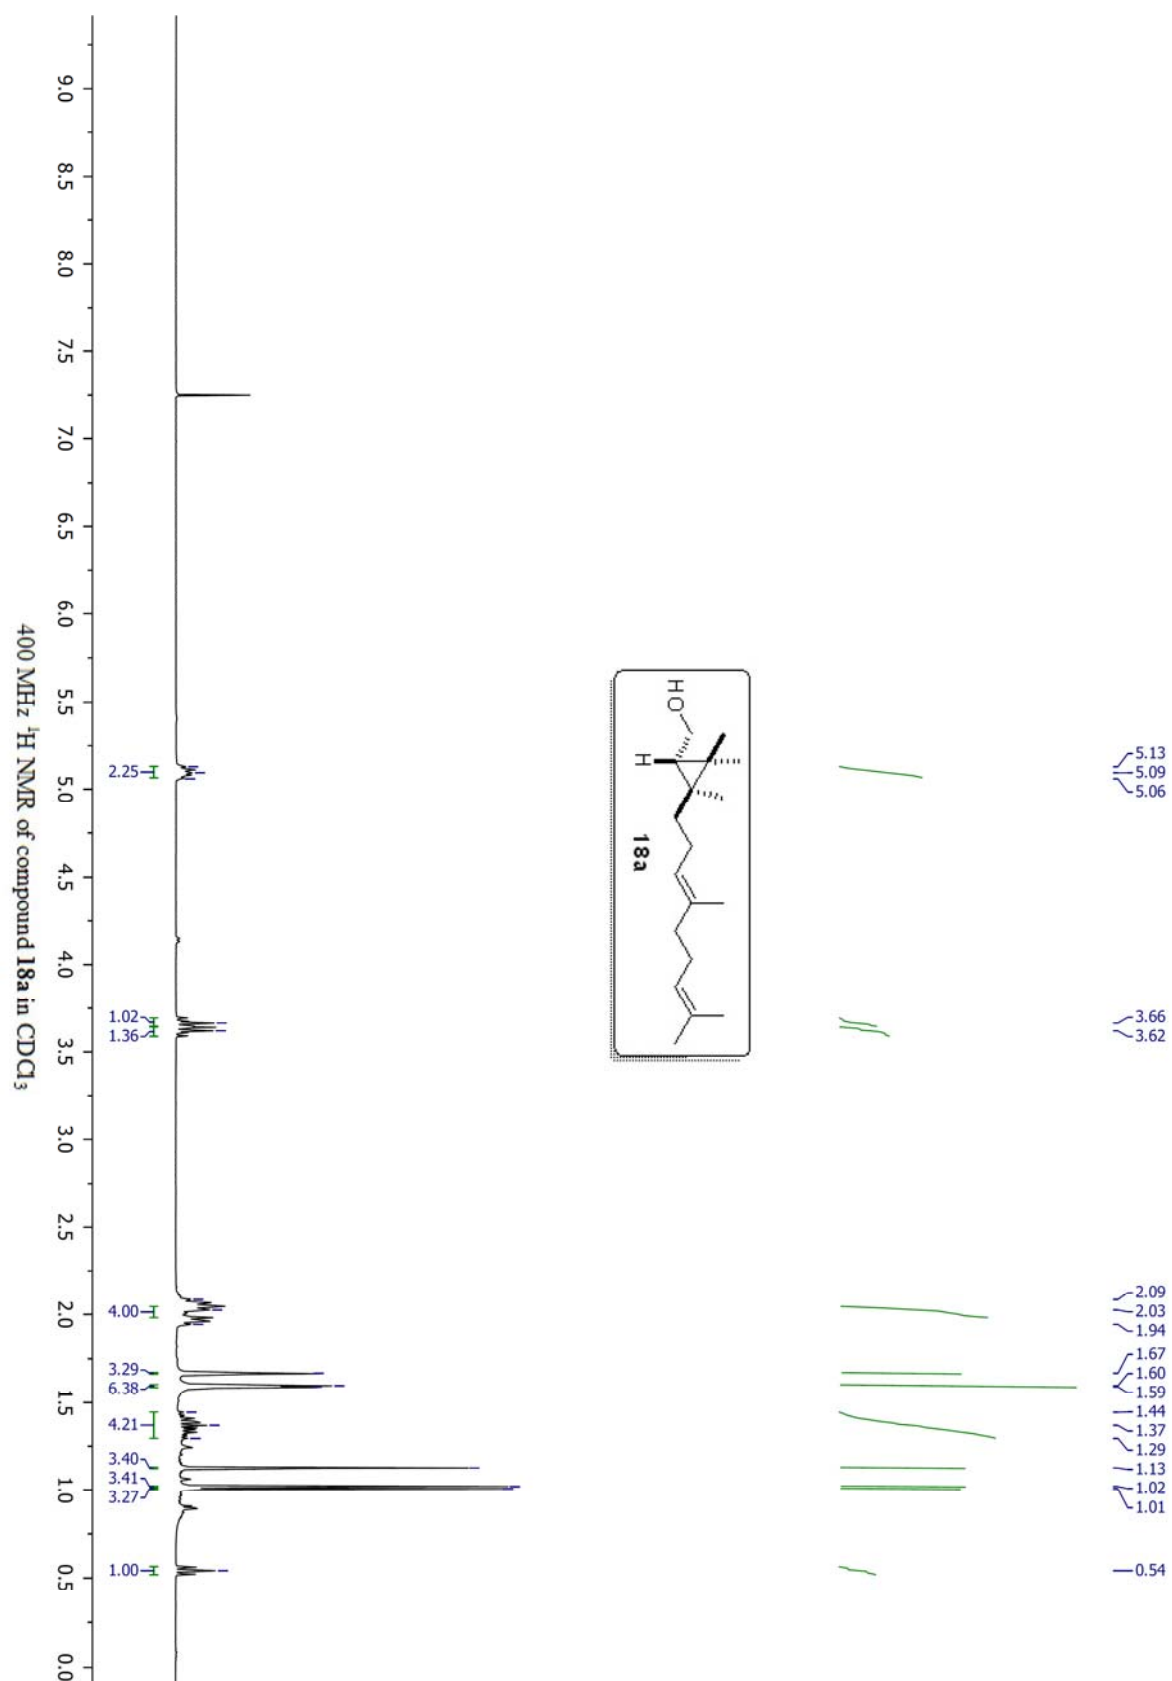

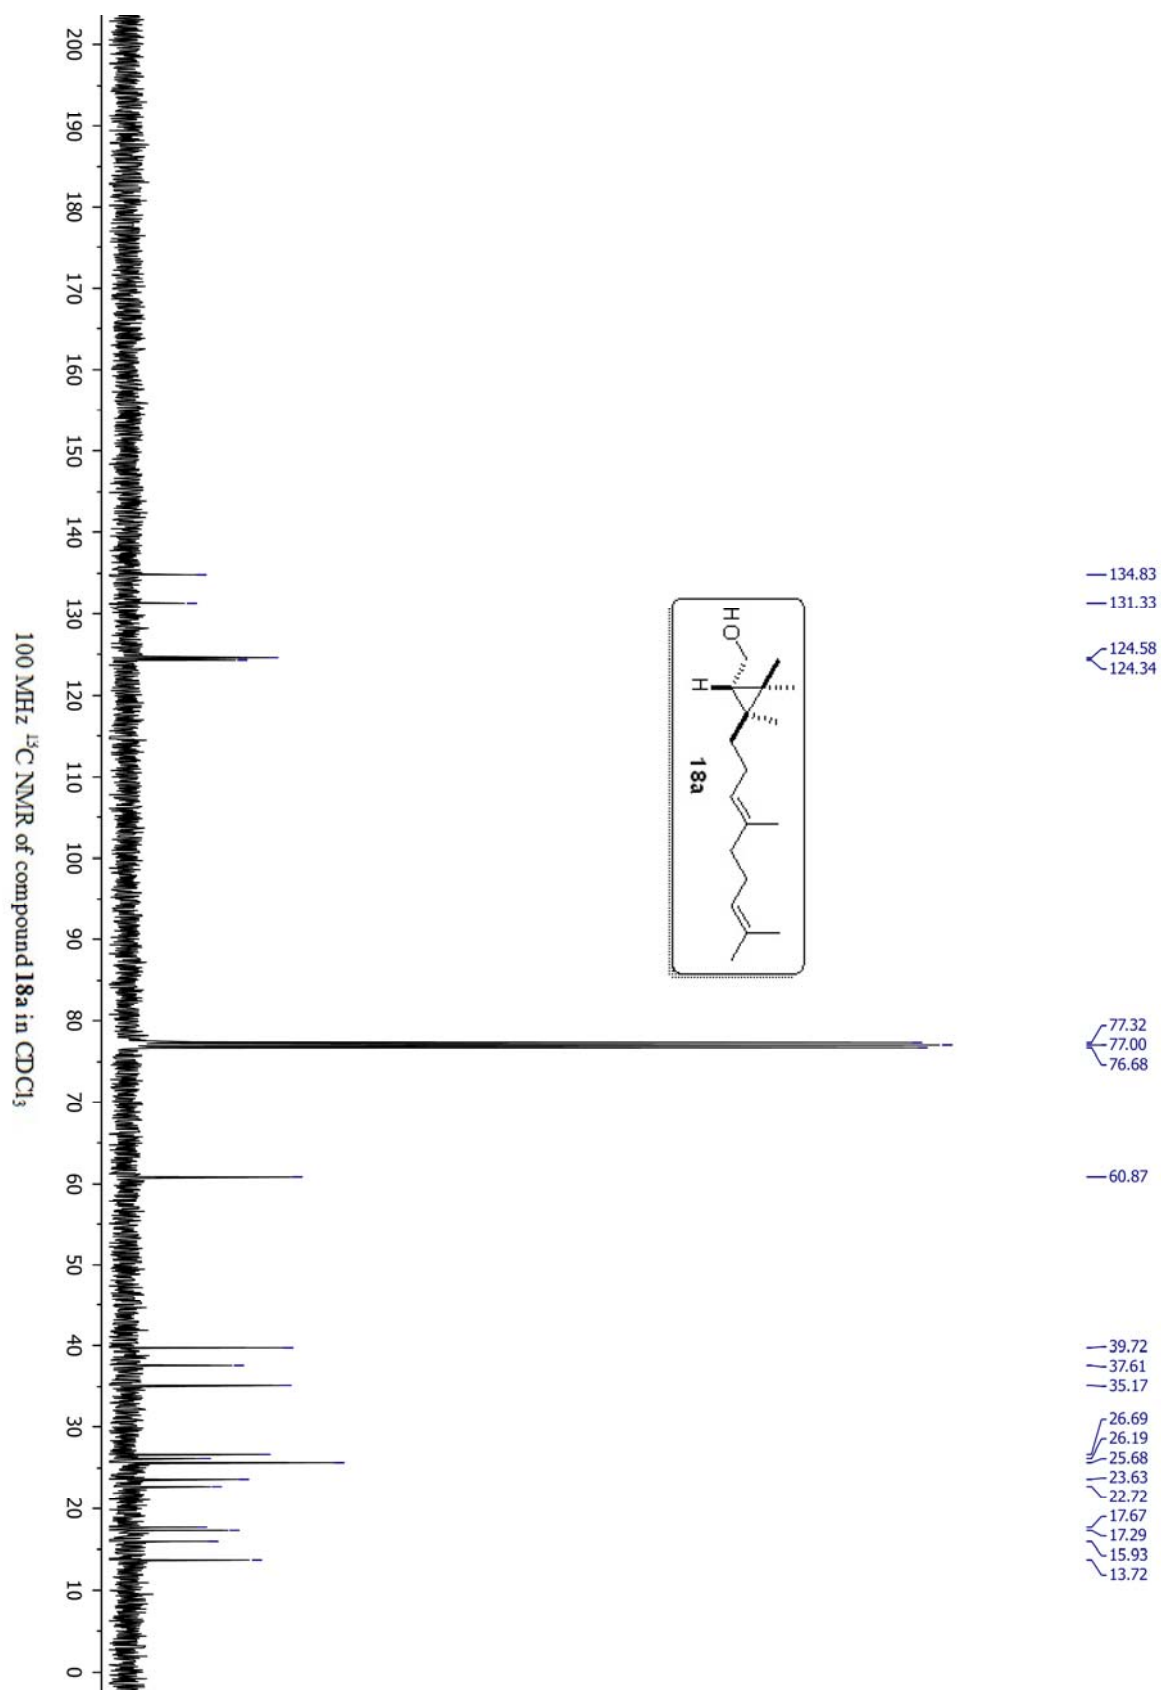

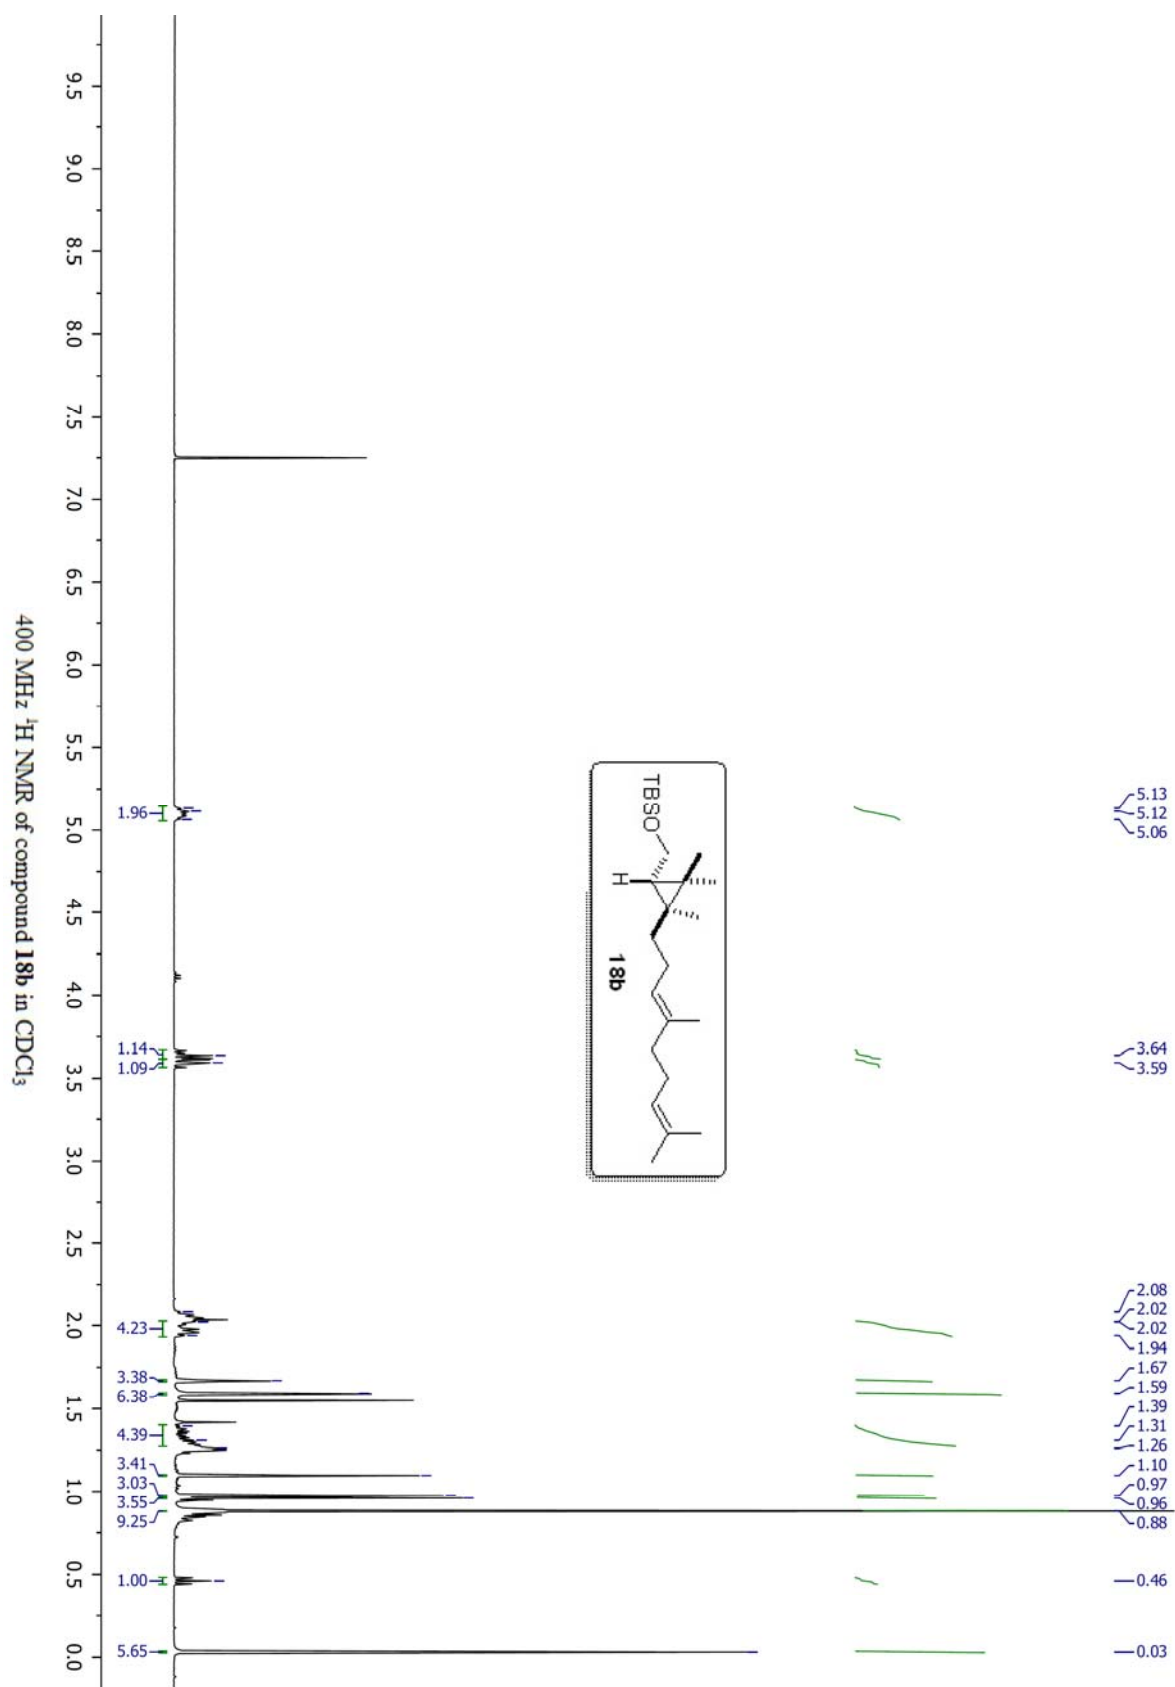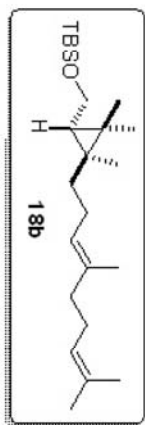



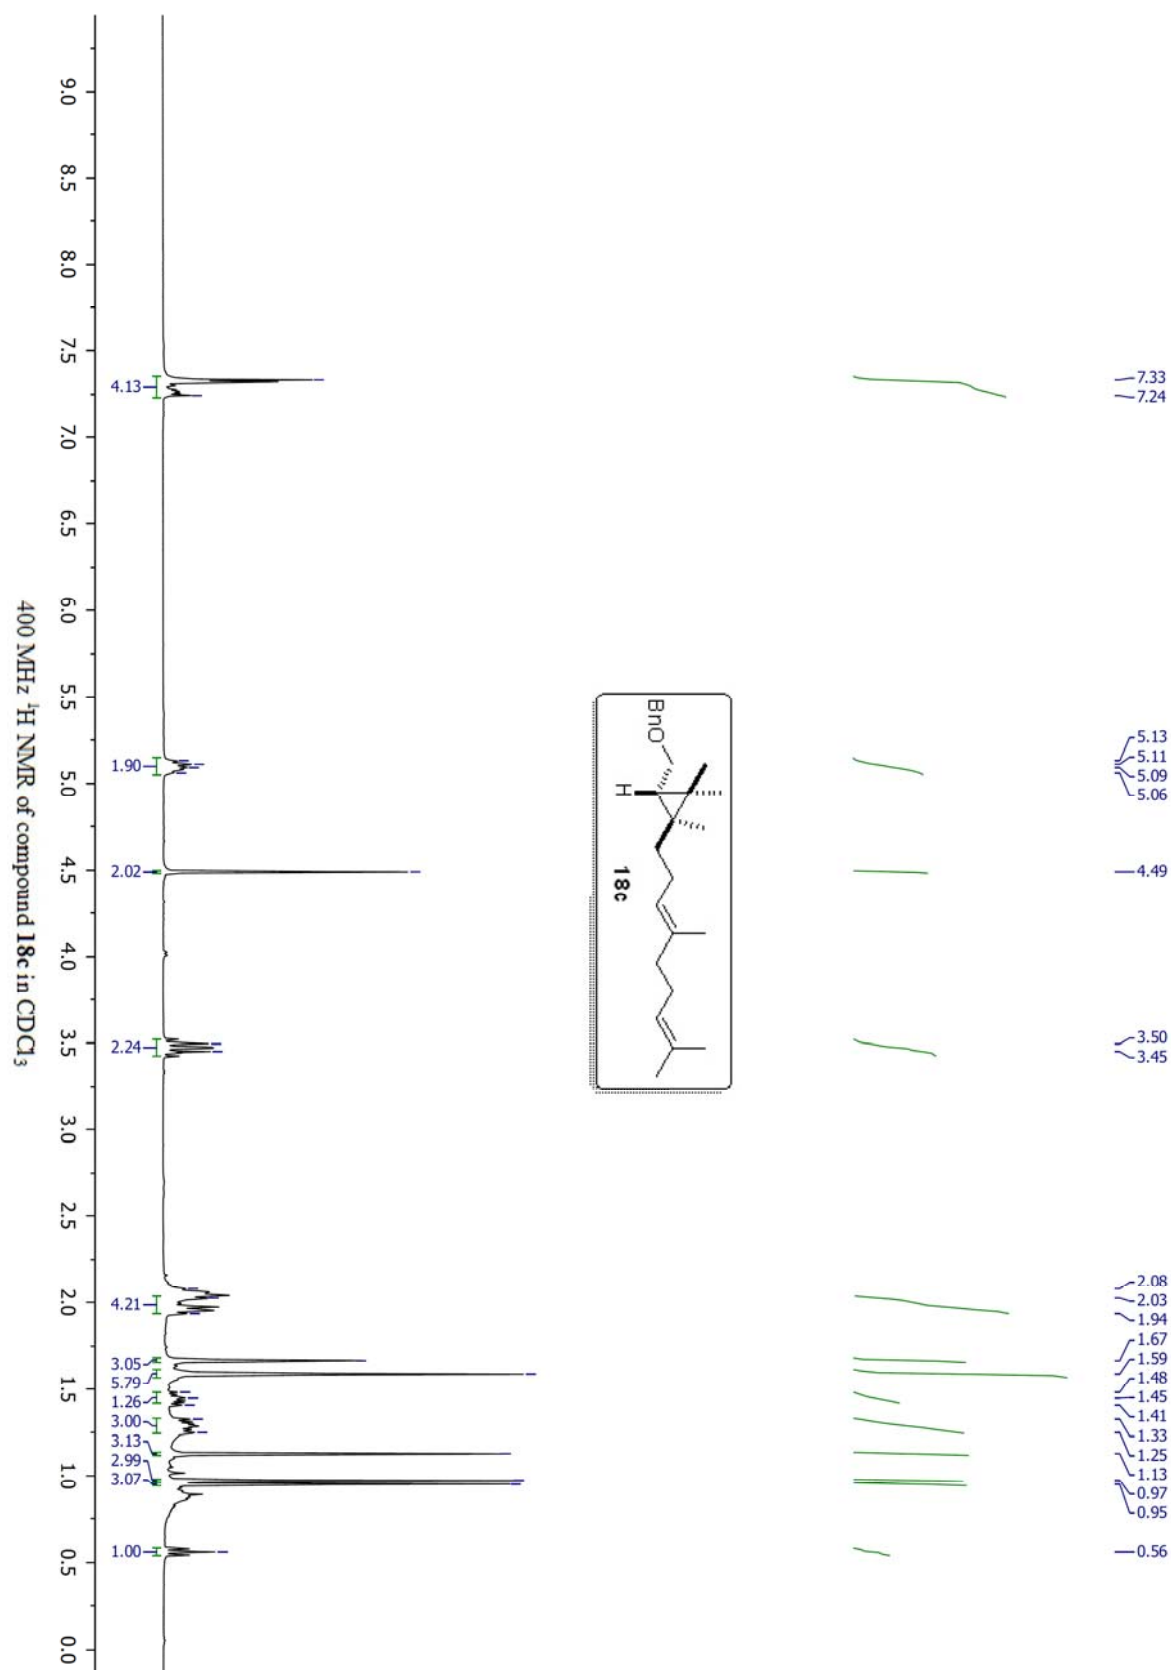

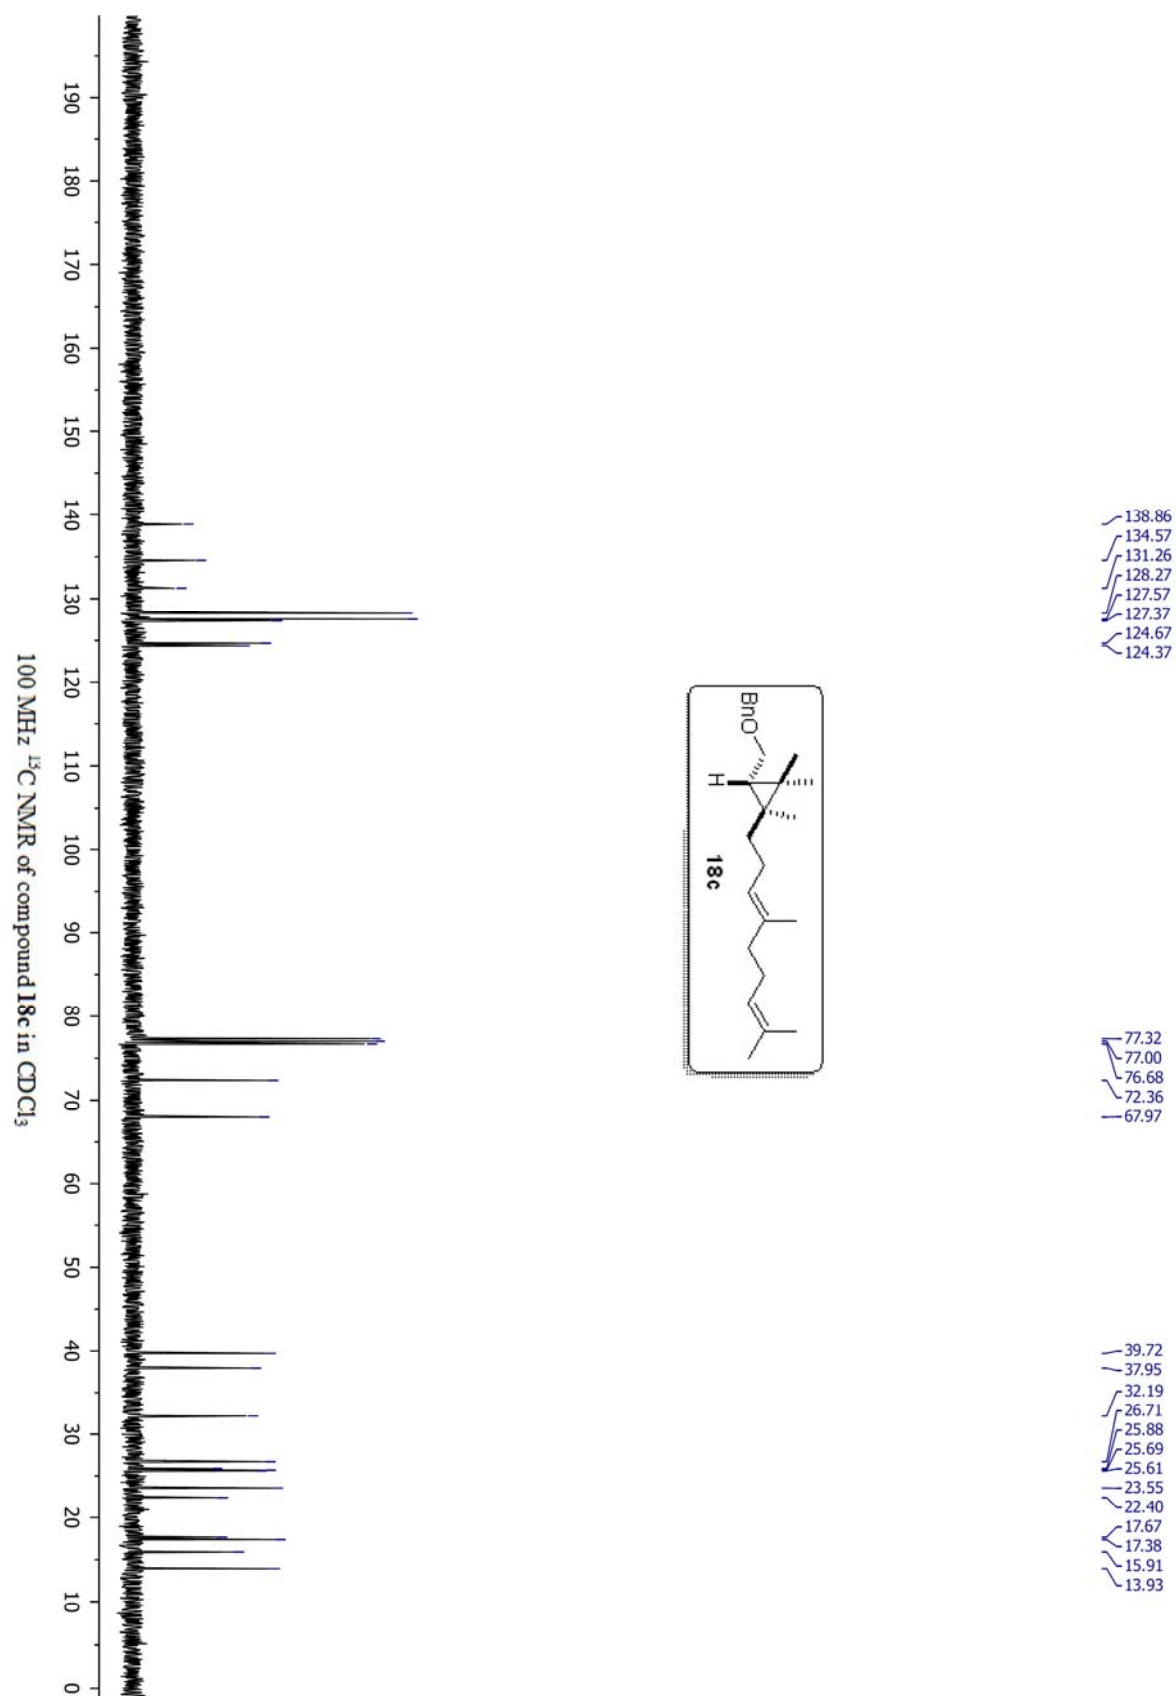

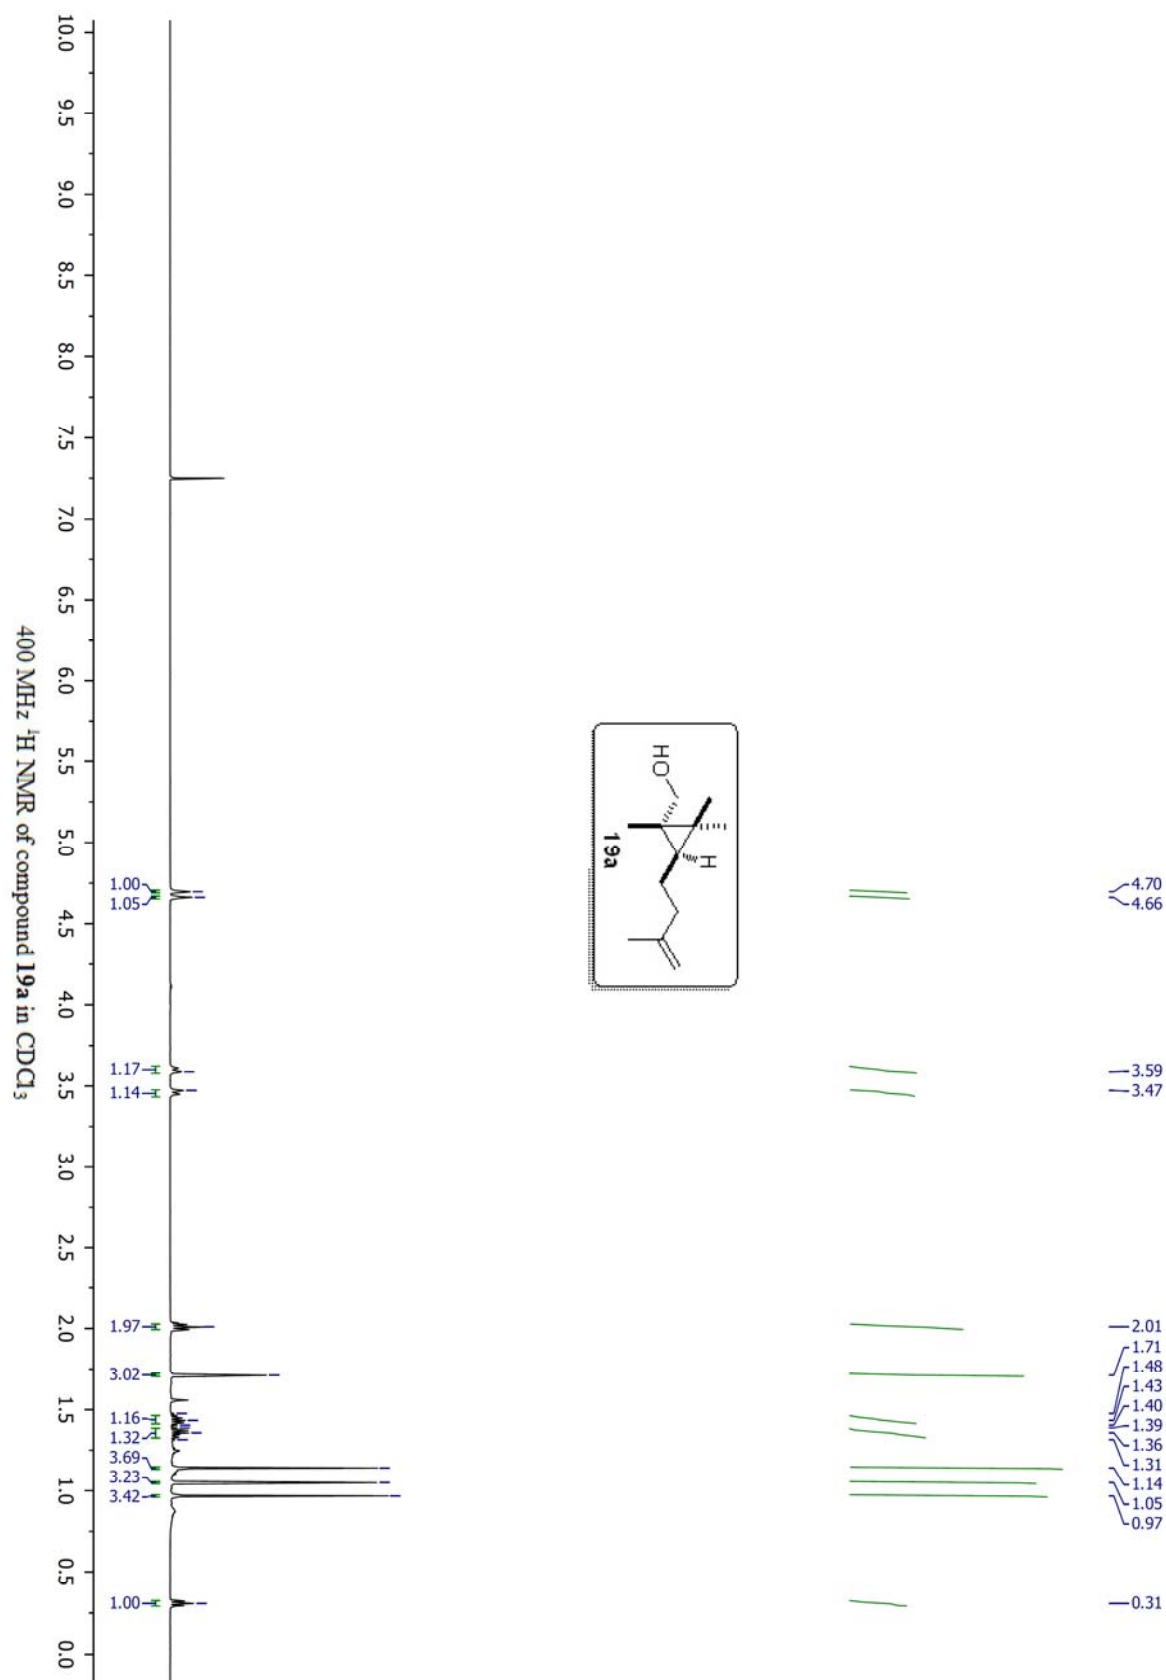

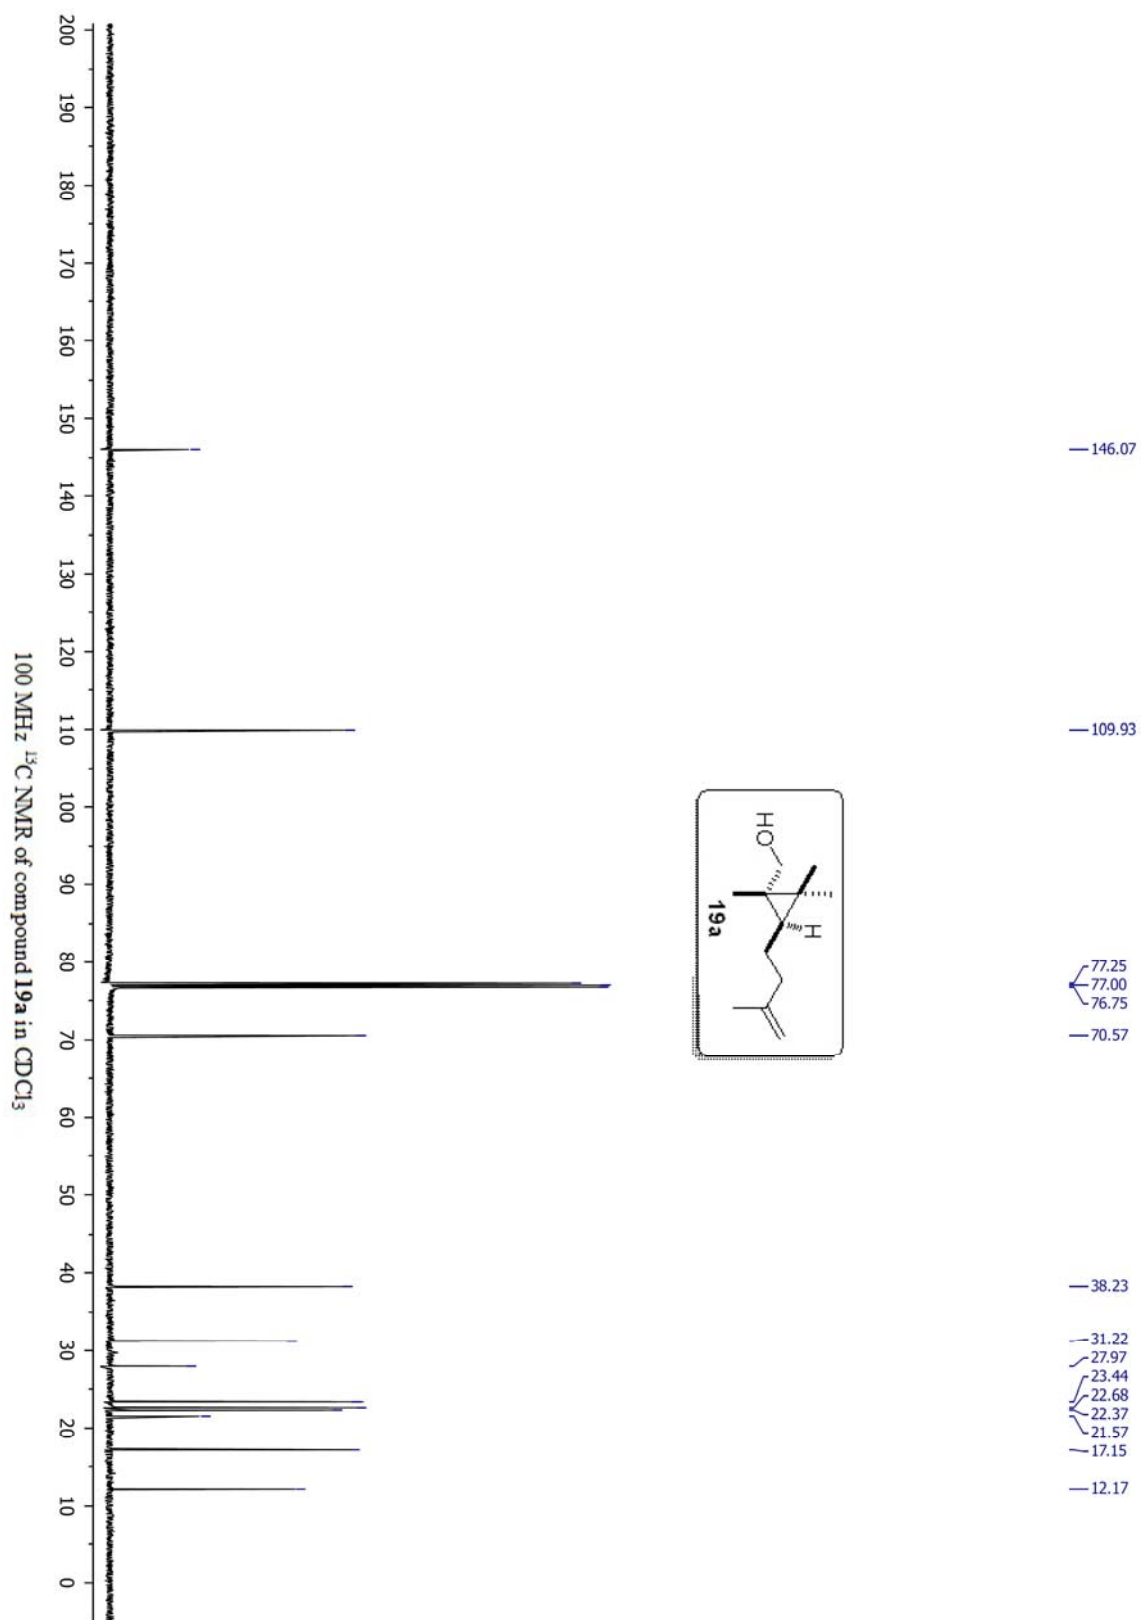

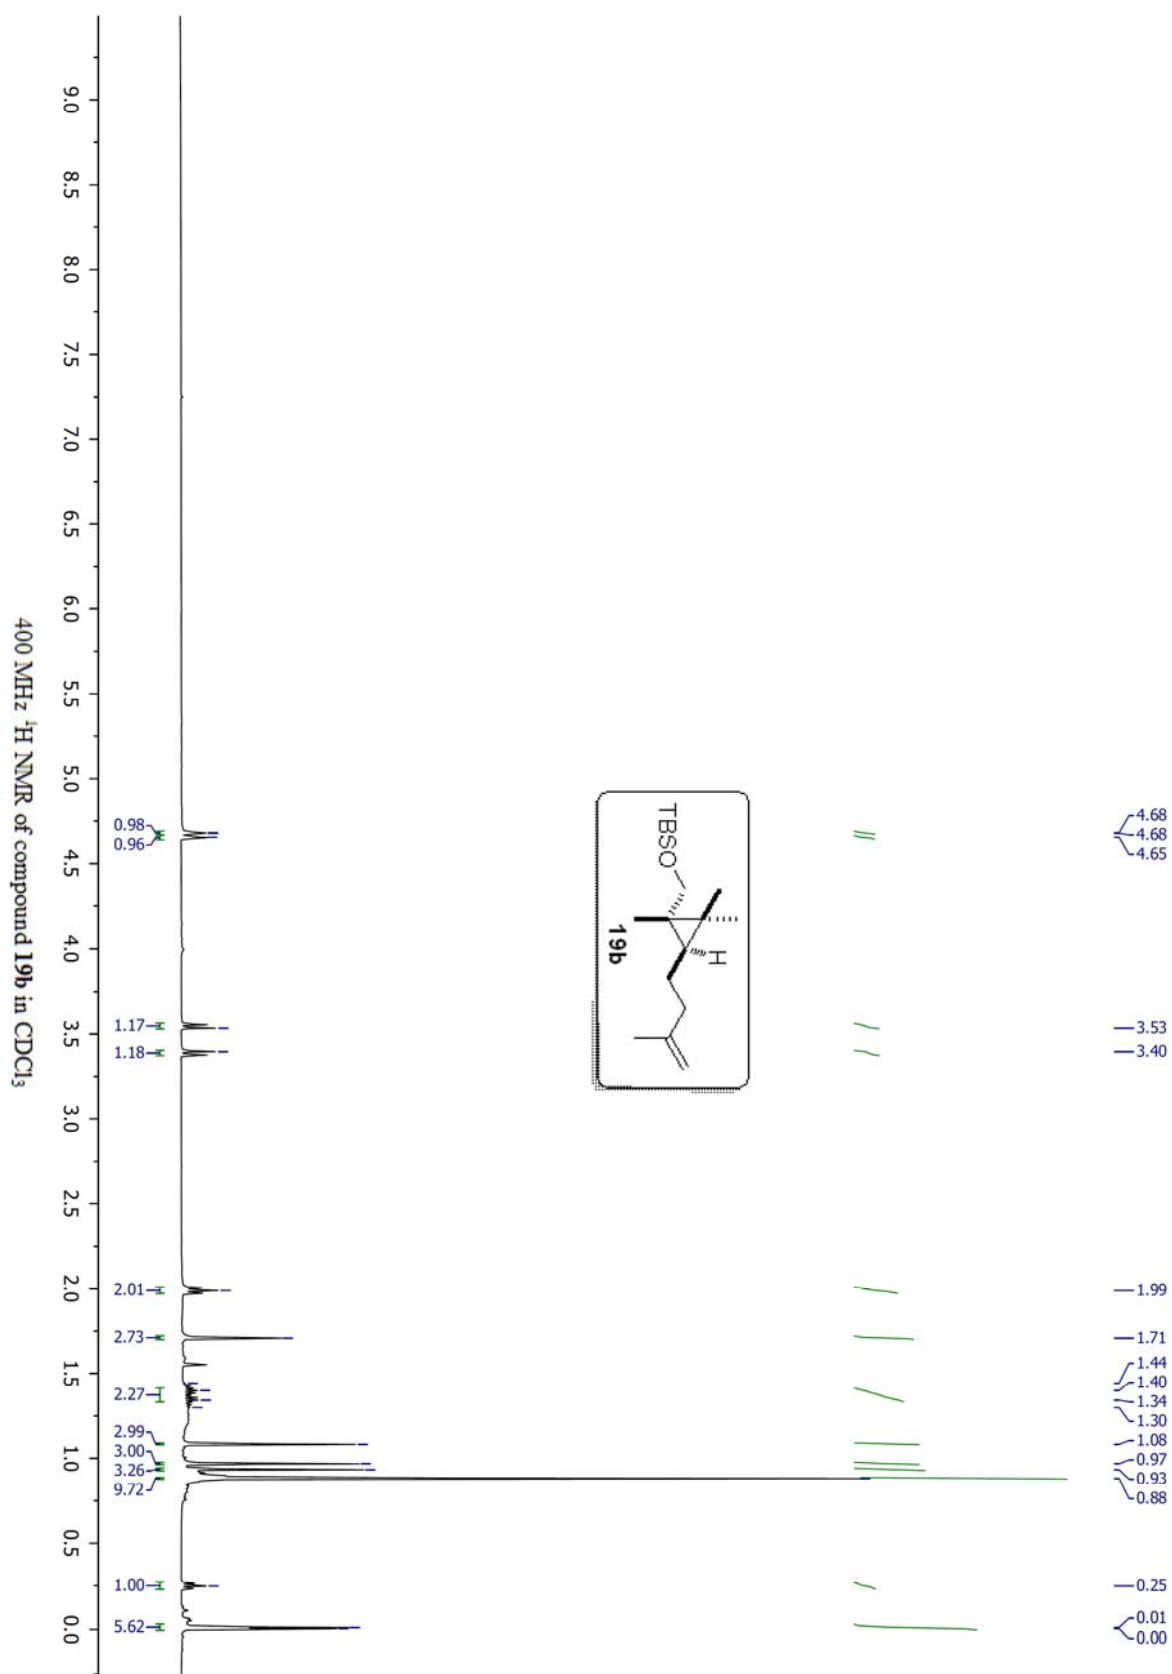

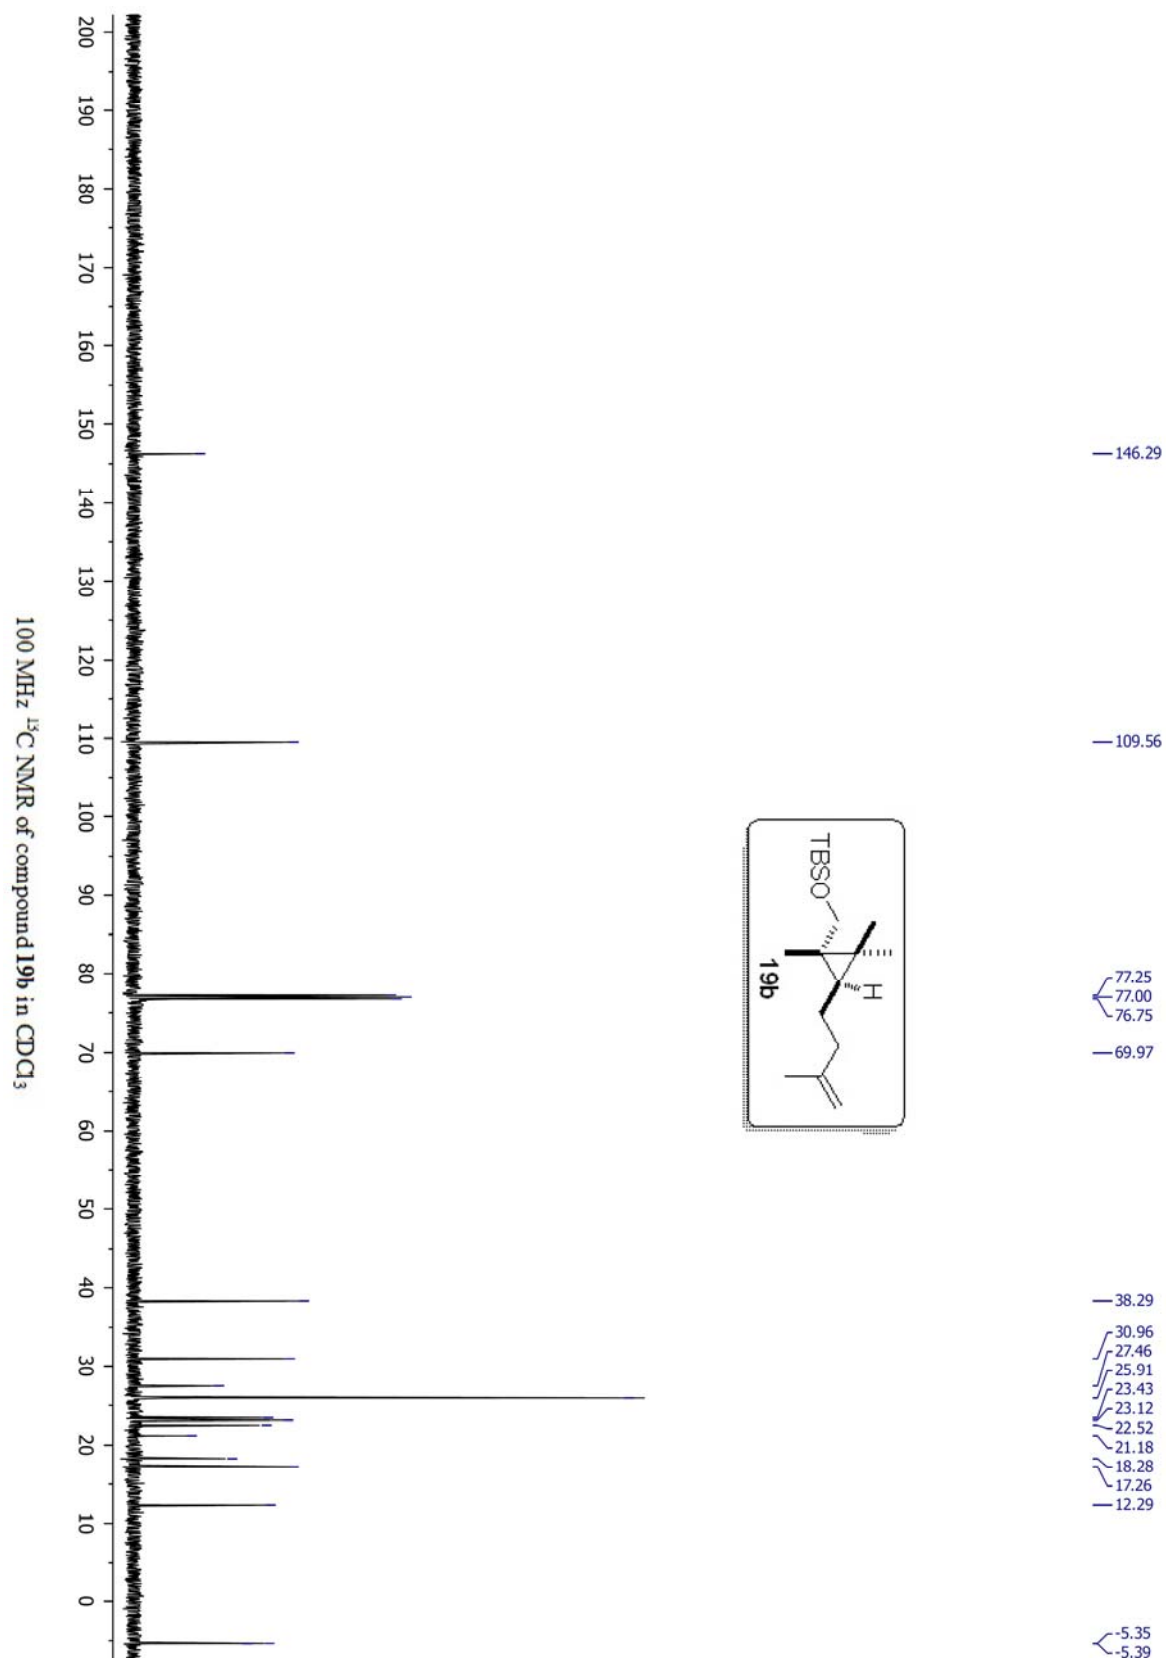

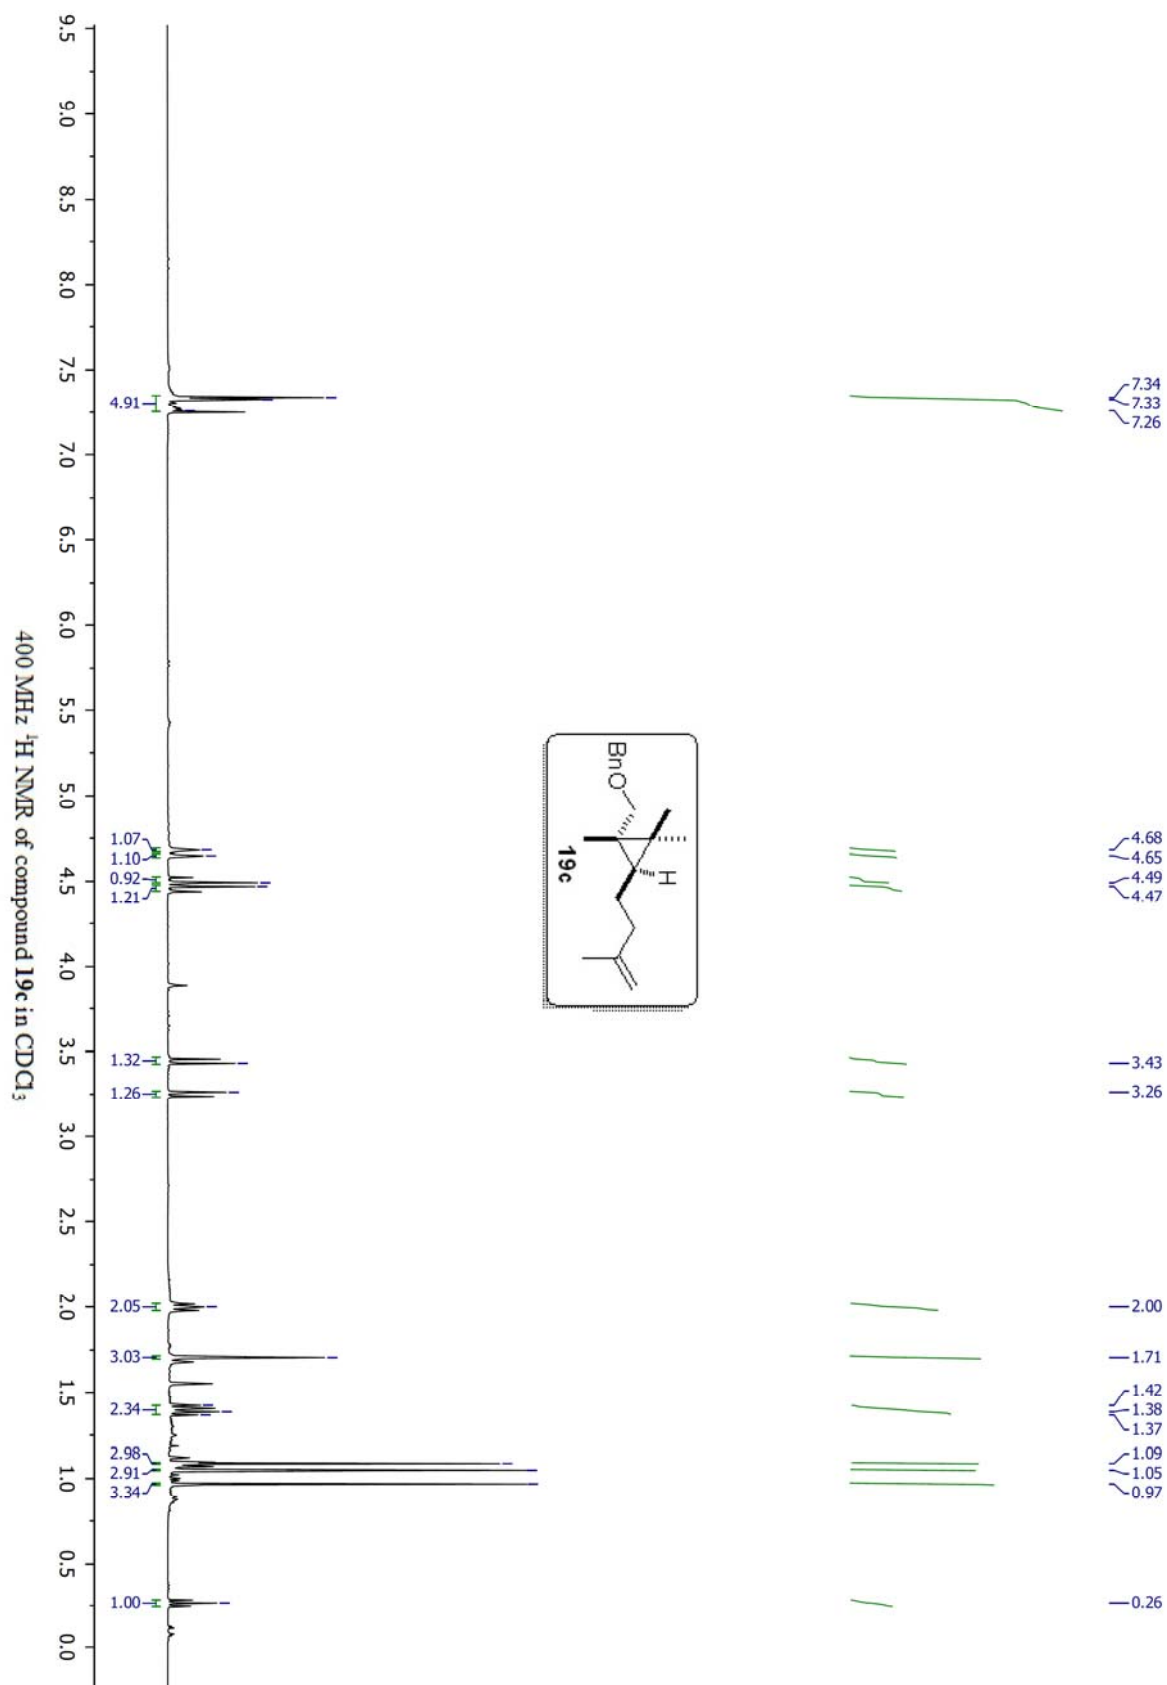

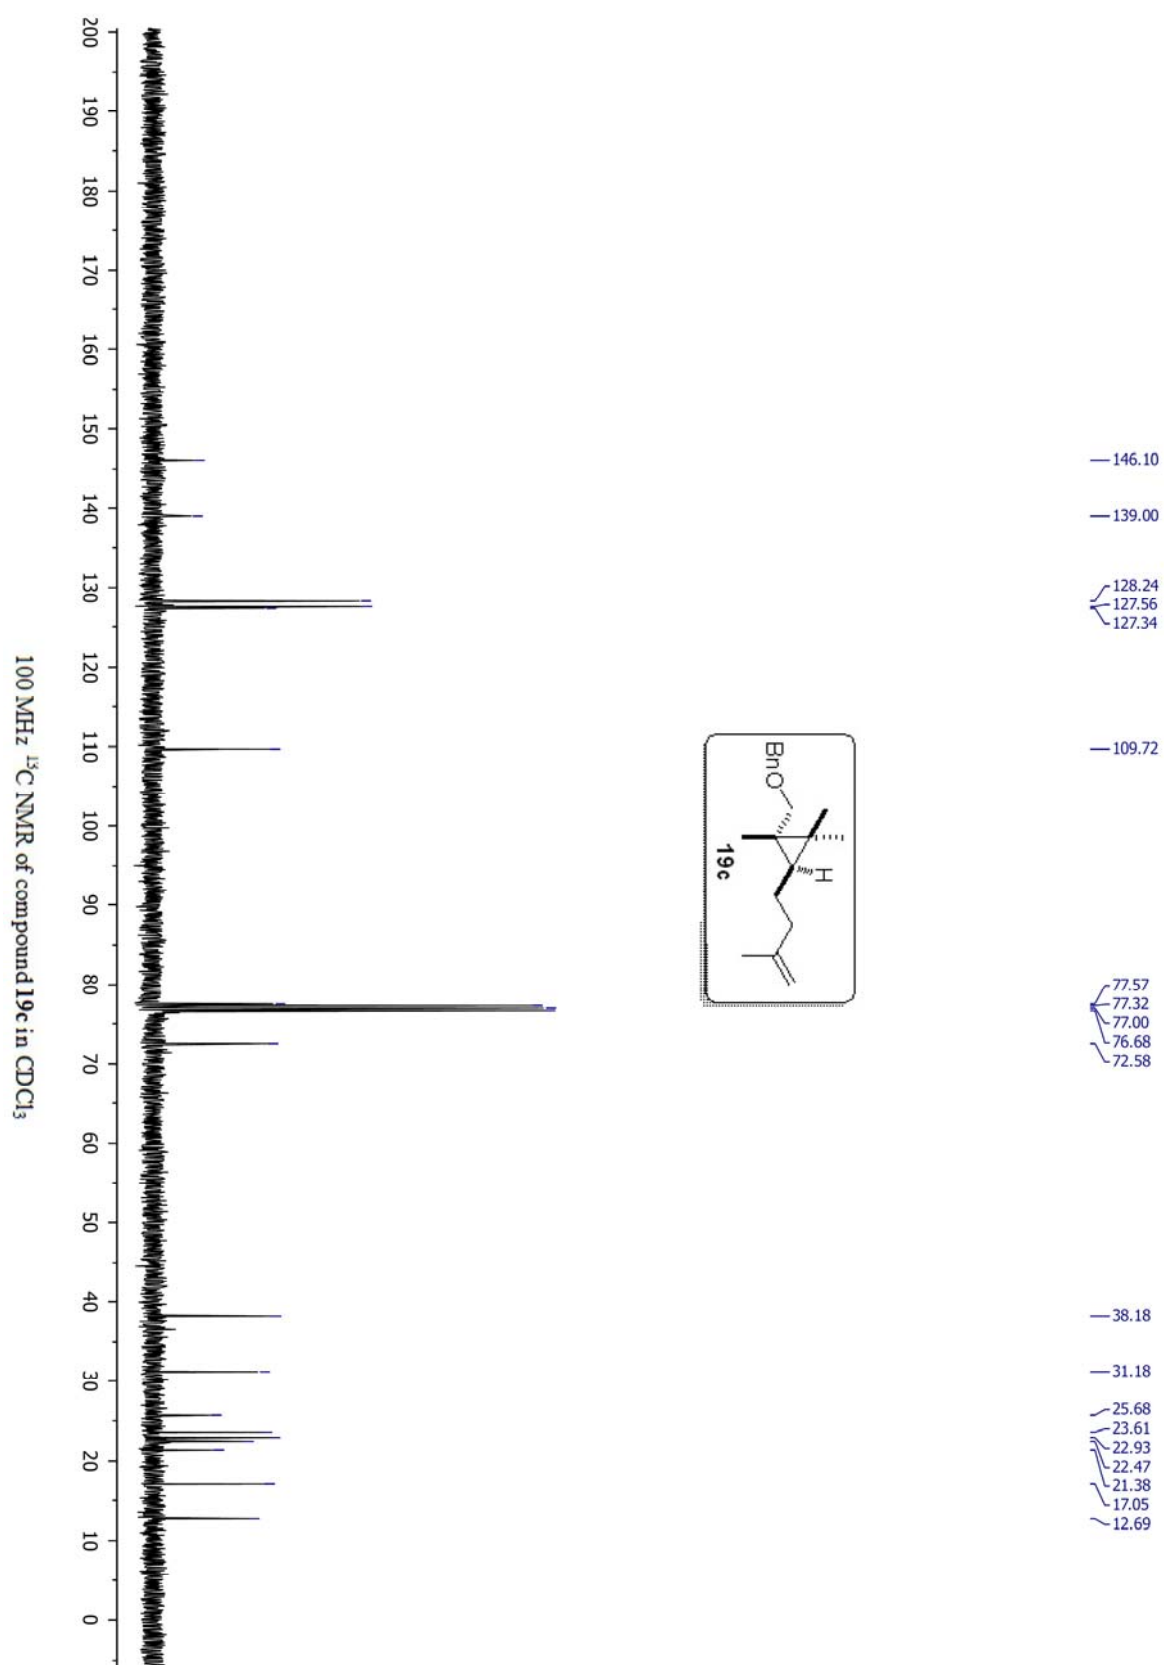

## PART D : SELECTED NOESY SPECTRA

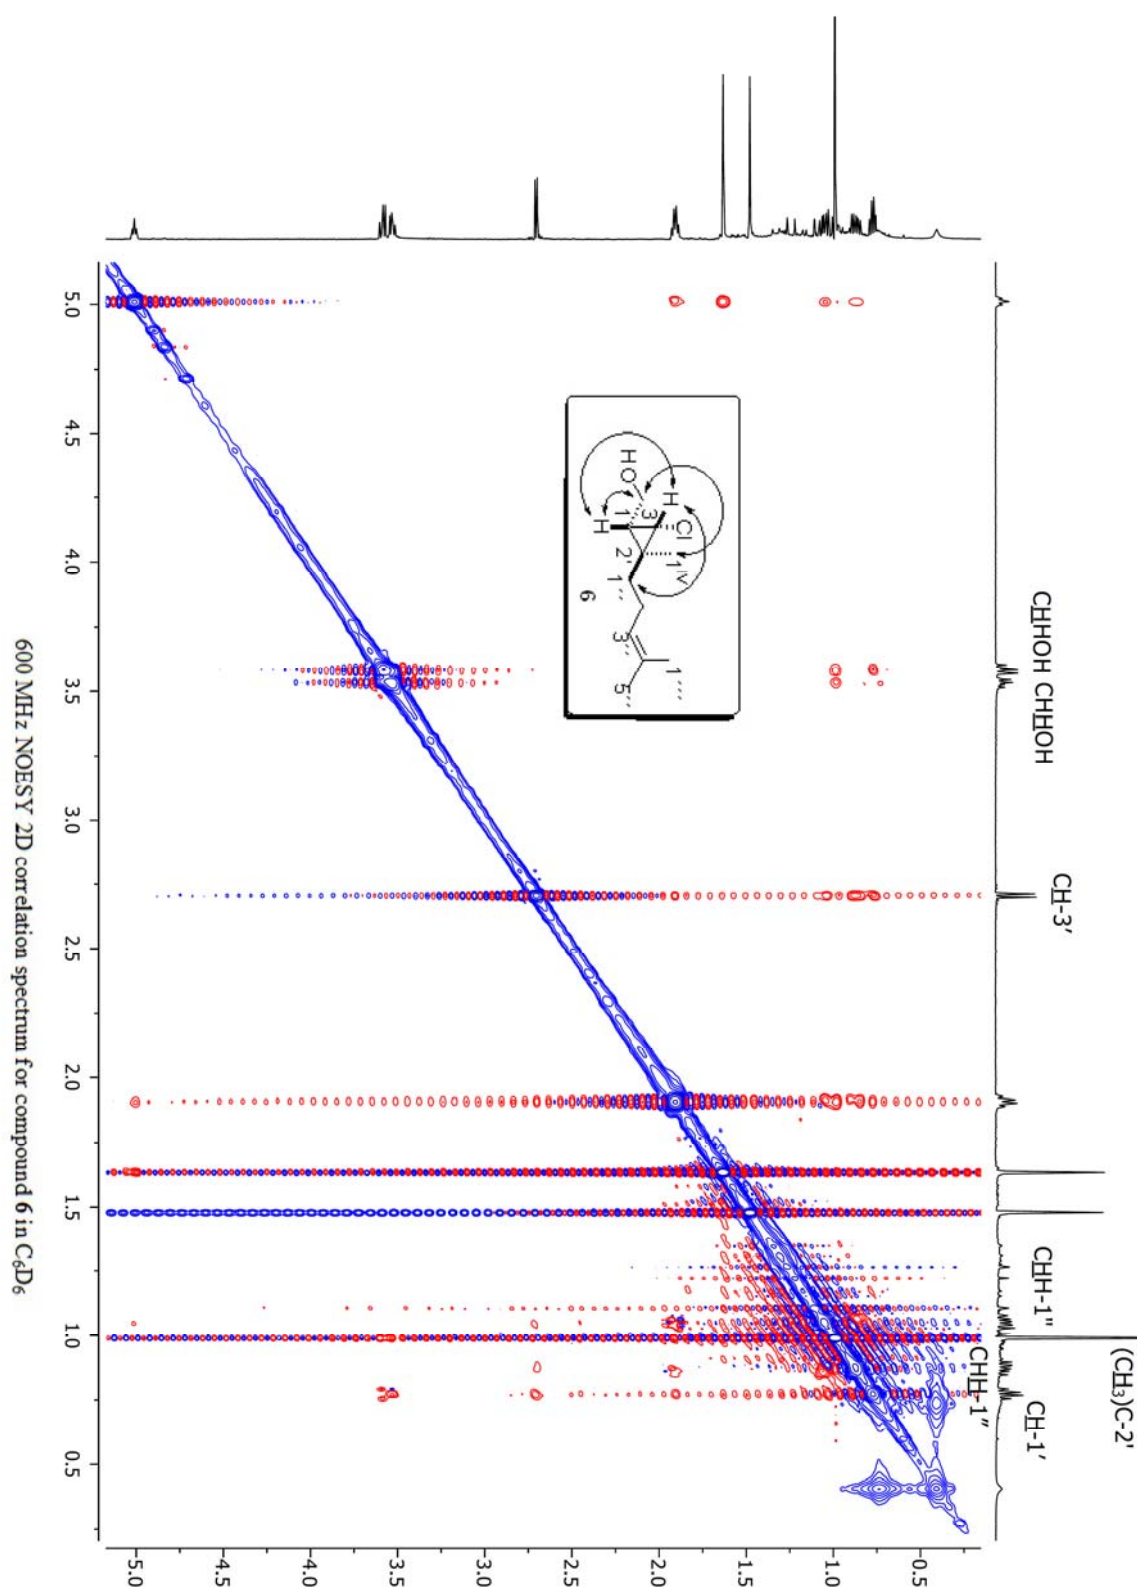

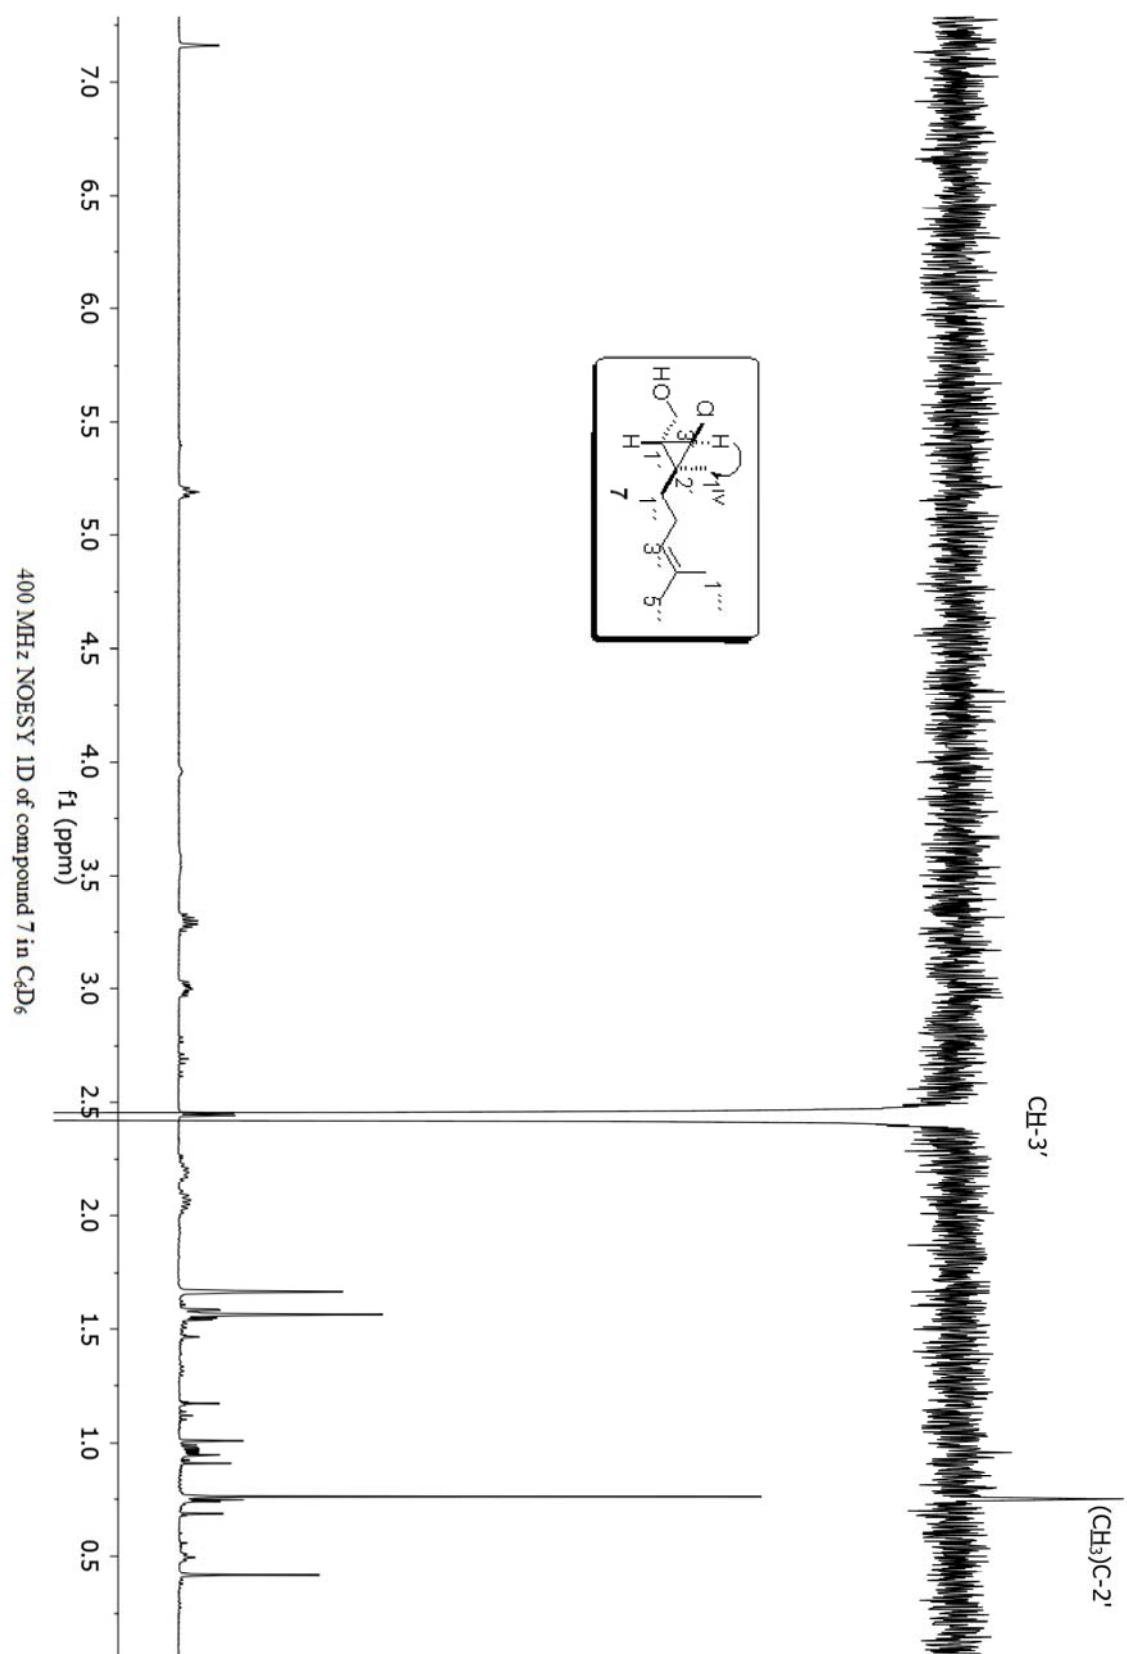



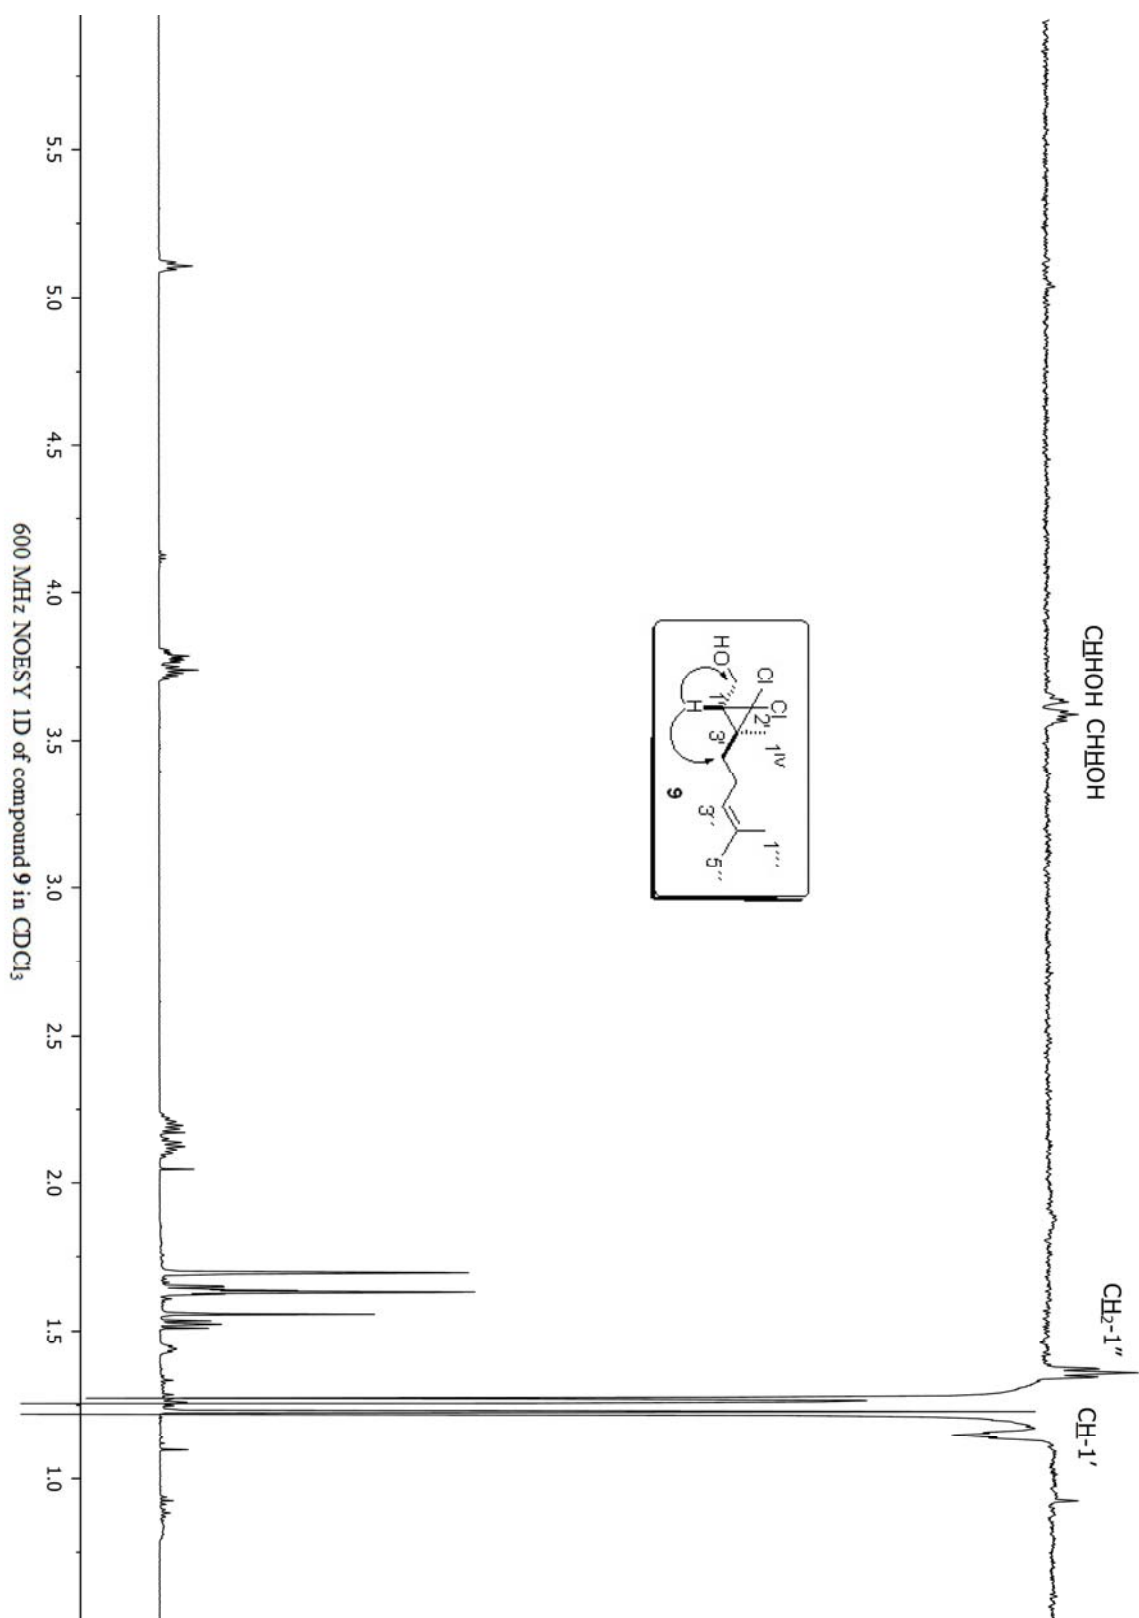

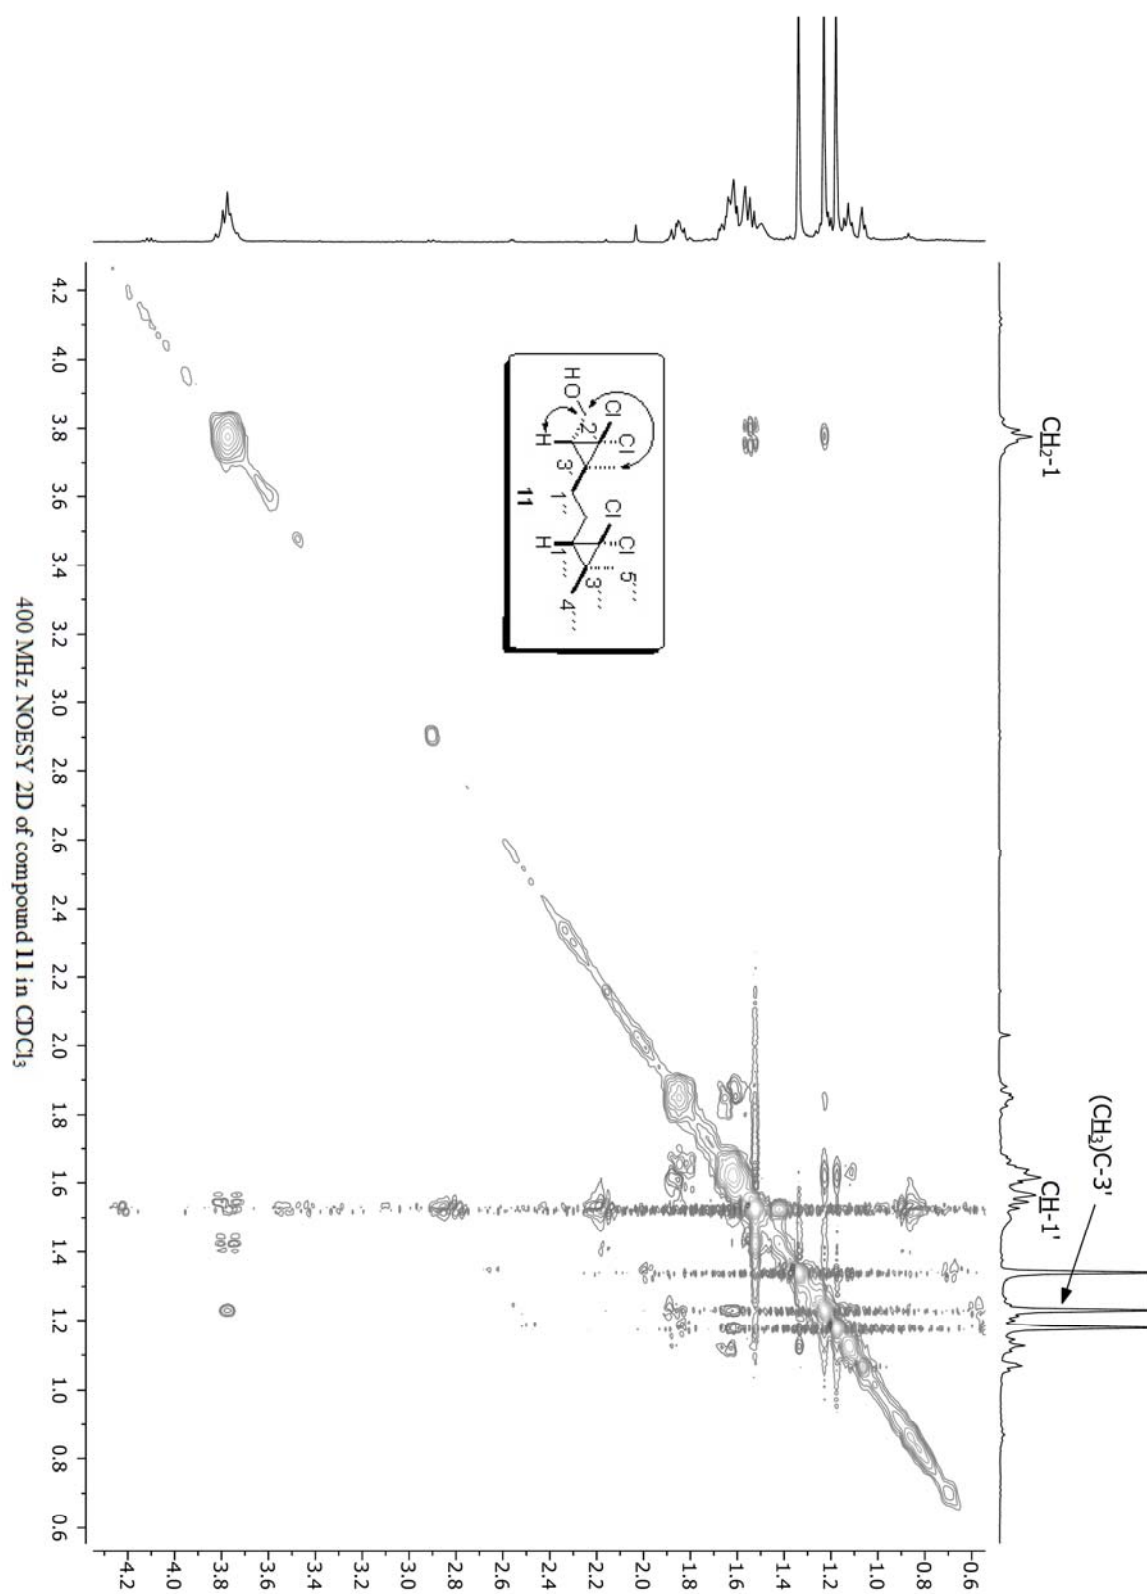

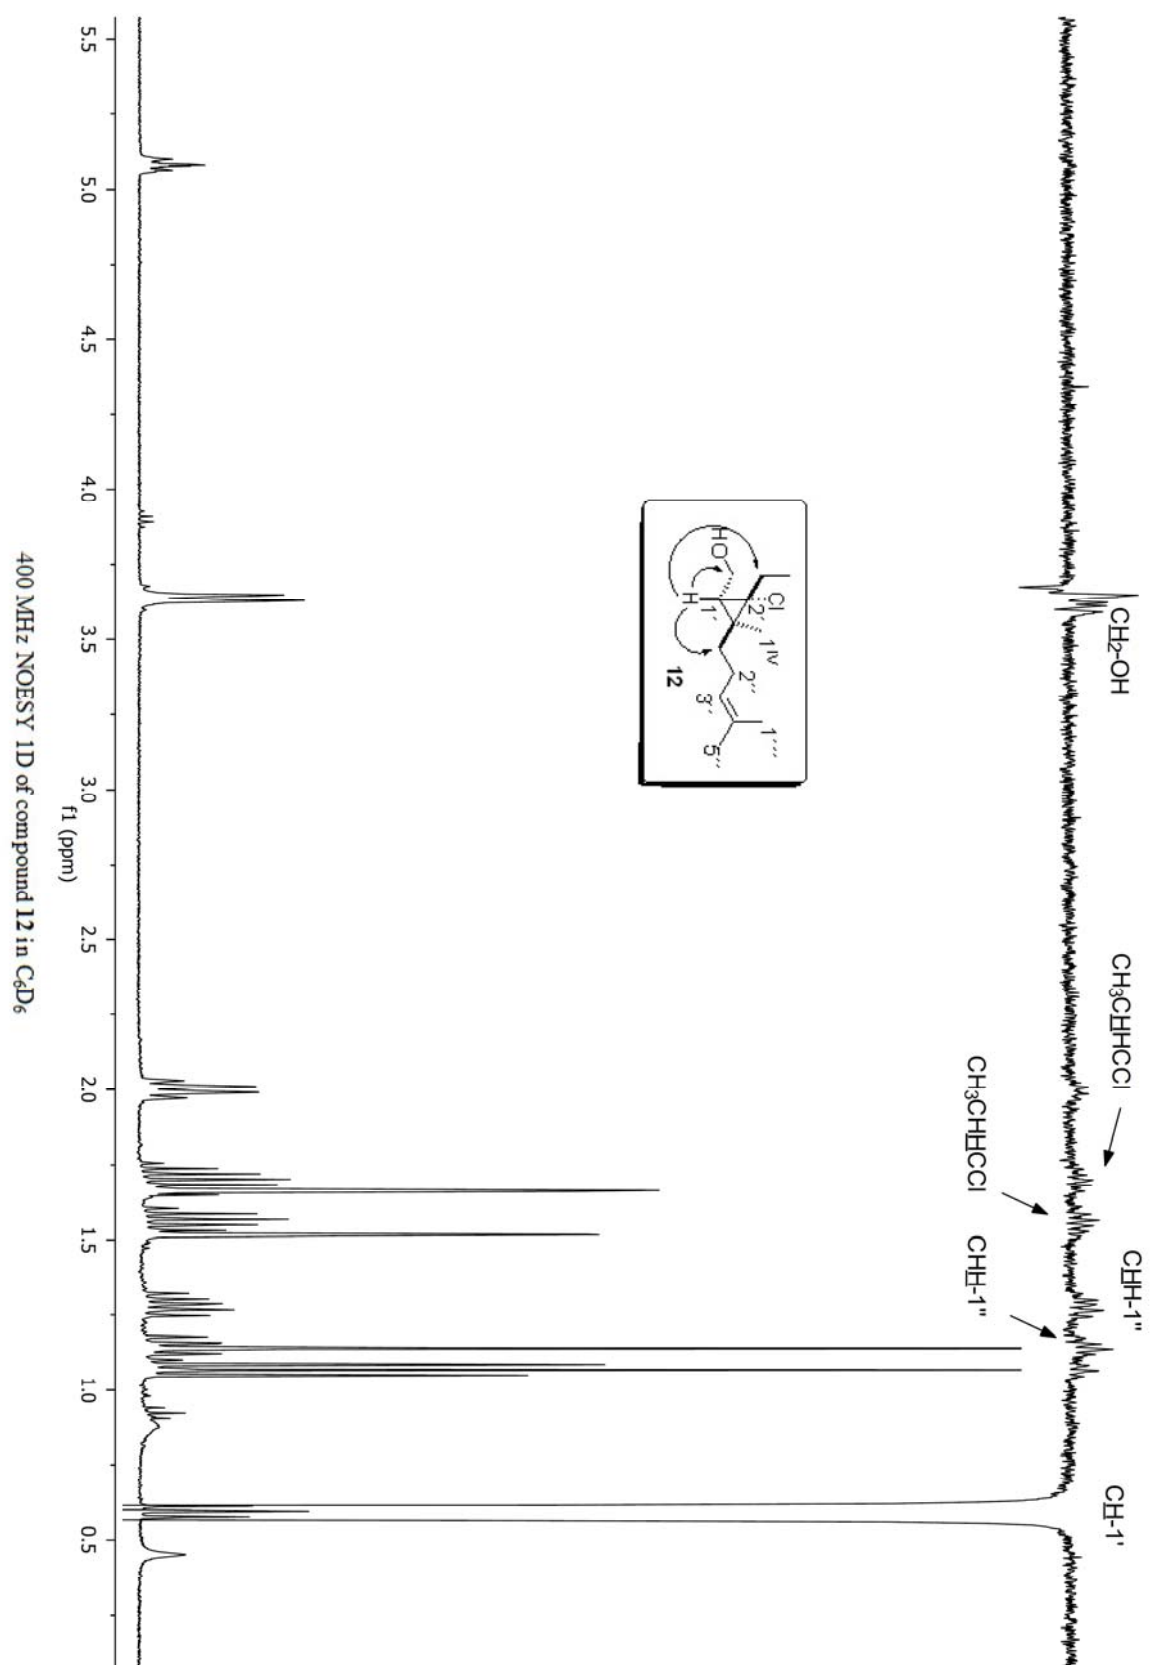

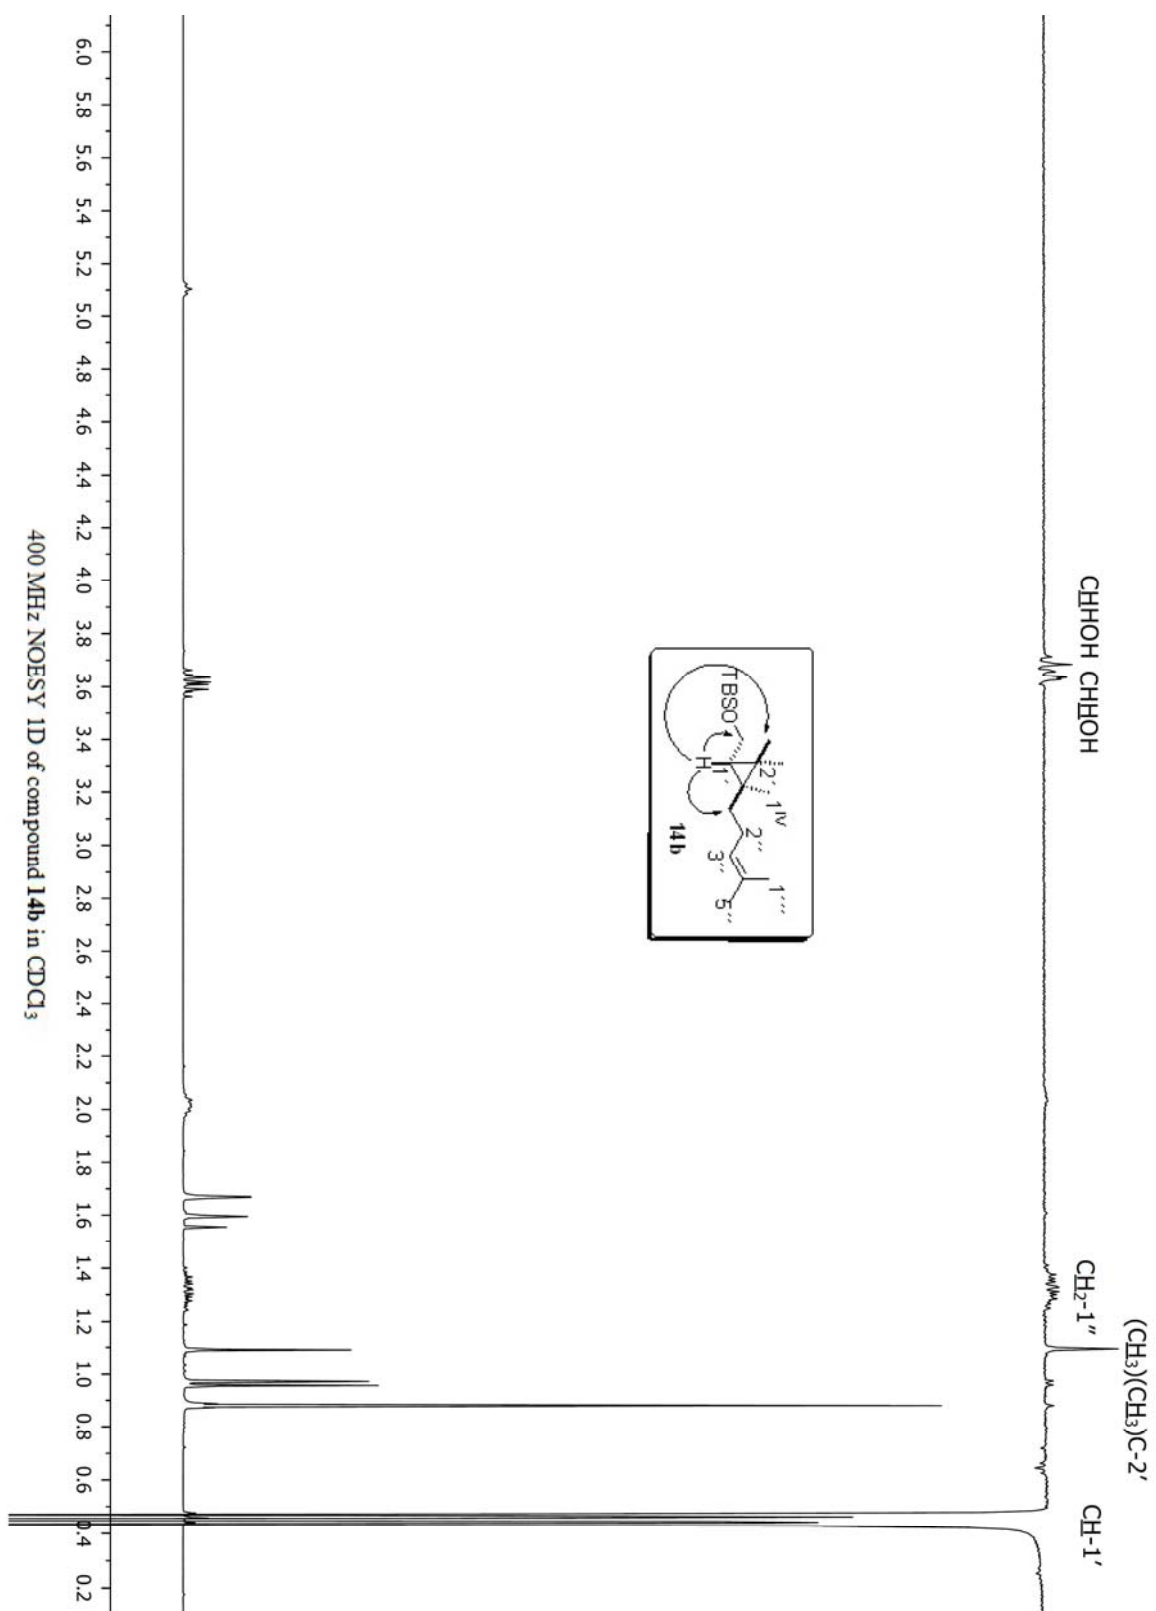

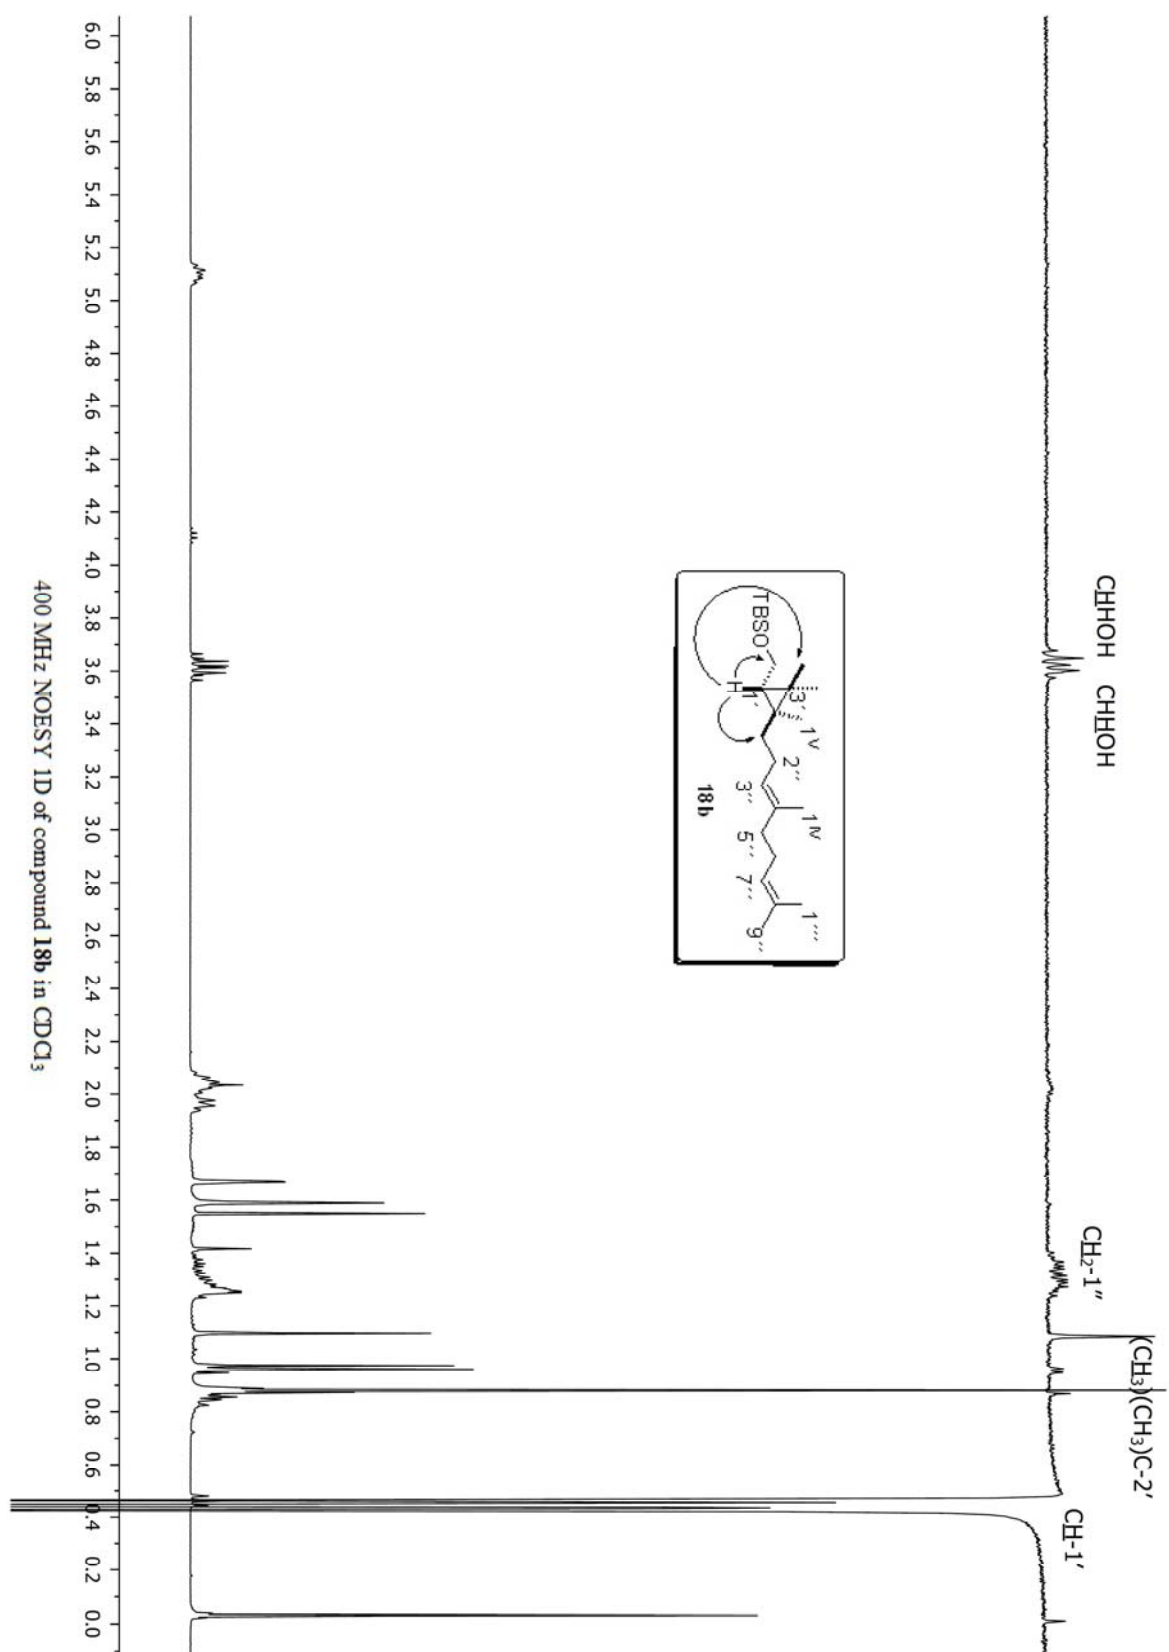

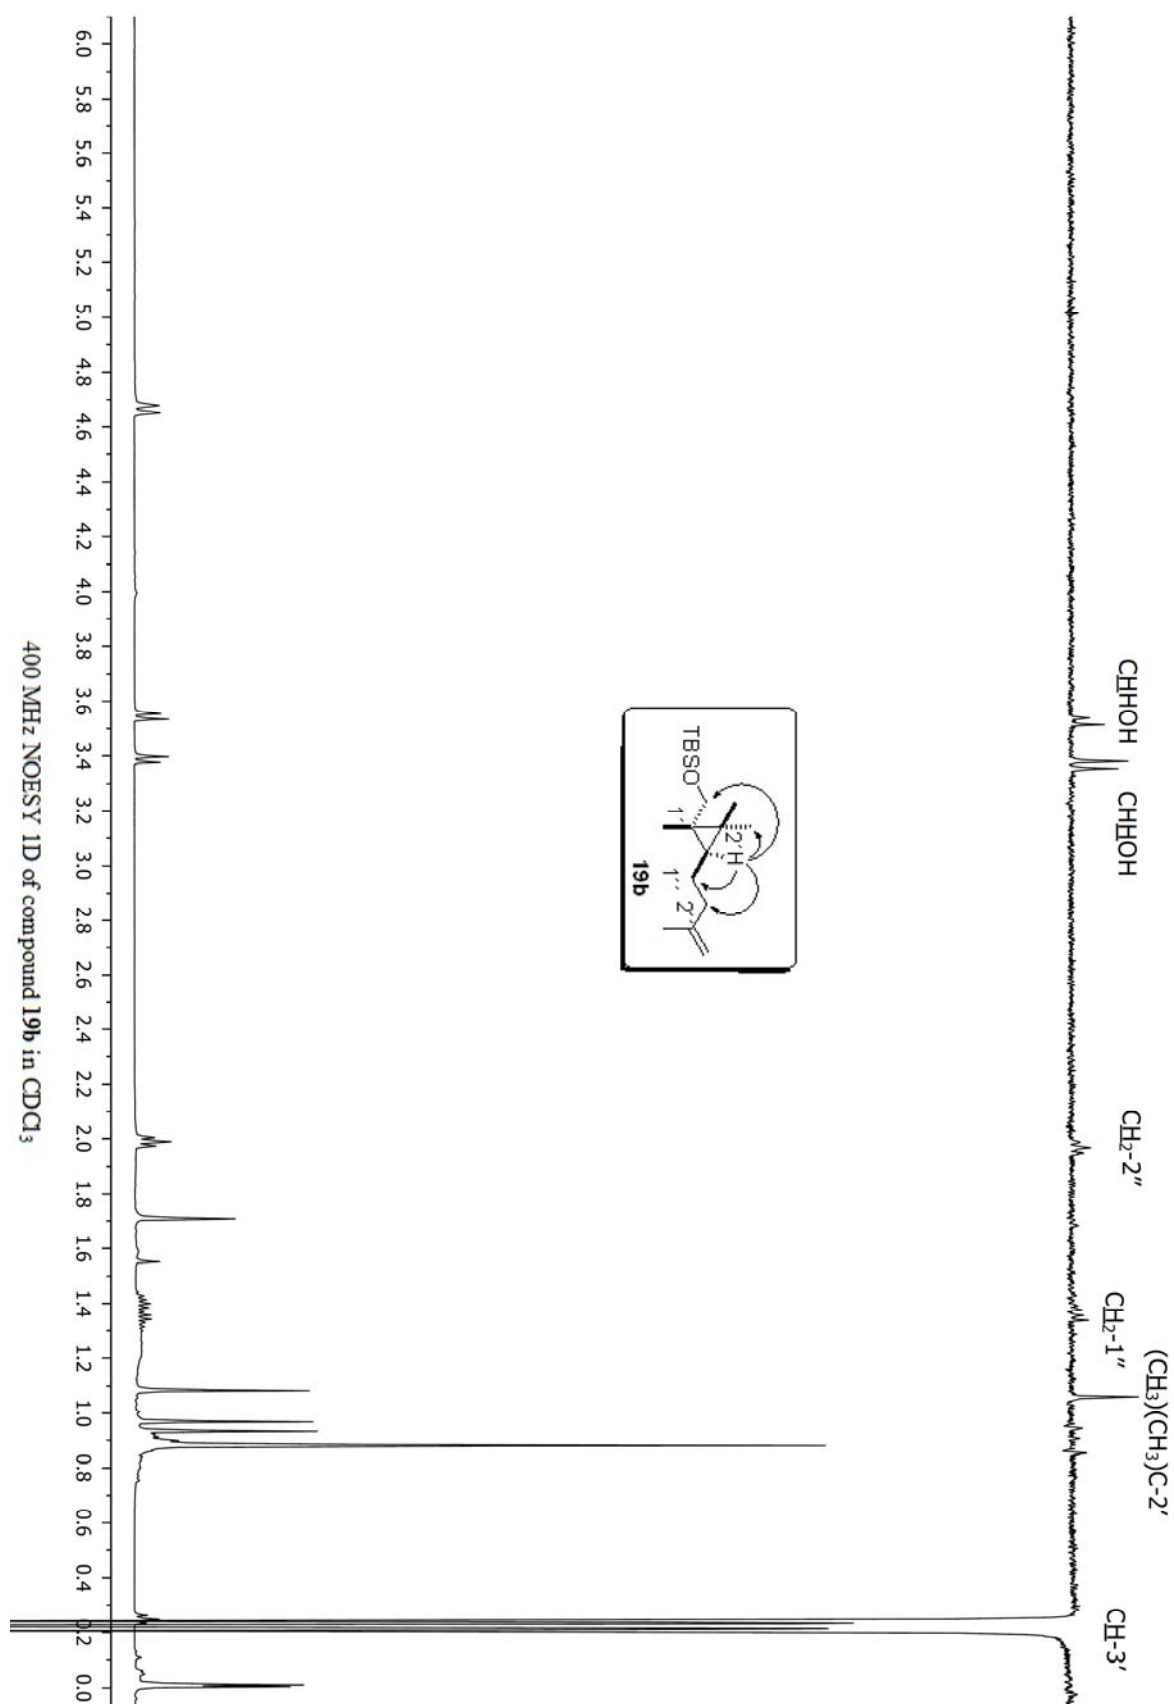

Supplement: c5ob02617b1.pdf [file c5ob02617b1.pdf]
